# Supplementary material for: Low connectivity between shallow, mesophotic and rariphotic zone benthos
Source: R Soc Open Sci. 2019 Sep 18;6(9):190958. doi: 10.1098/rsos.190958 (PMC6774966; doi:10.1098/rsos.190958)
Supplement: Supplementary Data 3 [file rsos190958supp8.xlsx]

## Sheet: Sheet1
SIMPER (Similarity Percentages - species contributions)	Depth
Data type: Presence-Absence
Factor: Depth
Resemblance: Bray-Curtis similarity
Cut off for low contributions: 70.00%
Group 15m
Average similarity: 82.90
Species	Av.Abund	Av.Sim	Sim/SD	Contrib%	Cum.%
Orbicella franksi	1	4.7	11.94	5.67	5.67
Montastraea cavernosa	1	4.7	11.94	5.67	11.35
Diploria labyrinthiformis	1	4.7	11.94	5.67	17.02
Pseudodiploria strigosa	1	4.7	11.94	5.67	22.7
Porites astreoides	1	4.7	11.94	5.67	28.37
Antillogorgia spp.	1	4.7	11.94	5.67	34.04
Eunicea spp.	1	4.7	11.94	5.67	39.72
Plexaurella spp.	1	4.7	11.94	5.67	45.39
Pseudoplexaura spp.	1	4.7	11.94	5.67	51.07
Dictyopteris spp. /Dictyota spp.	1	4.7	11.94	5.67	56.74
Brown fleshy crust	1	4.7	11.94	5.67	62.42
Aplysina fistularis	1	4.7	11.94	5.67	68.09
Yellow-green encrusting sponge	1	4.7	11.94	5.67	73.76
Group 30m
Average similarity: 85.74
Species	Av.Abund	Av.Sim	Sim/SD	Contrib%	Cum.%
Madracis spp.	1	4.63	15.1	5.4	5.4
Orbicella franksi	1	4.63	15.1	5.4	10.8
Montastraea cavernosa	1	4.63	15.1	5.4	16.19
Pseudodiploria strigosa	1	4.63	15.1	5.4	21.59
Porites astreoides	1	4.63	15.1	5.4	26.99
Antillogorgia spp.	1	4.63	15.1	5.4	32.39
Dictyopteris spp. /Dictyota spp.	1	4.63	15.1	5.4	37.78
Lobophora canariensis	1	4.63	15.1	5.4	43.18
Brown fleshy crust	1	4.63	15.1	5.4	48.58
Crustose coralline algae	1	4.63	15.1	5.4	53.98
Aplysina fistularis	1	4.63	15.1	5.4	59.37
Orange-red encrusting sponge	1	4.63	15.1	5.4	64.77
Yellow-green encrusting sponge	1	4.63	15.1	5.4	70.17
Group 60m
Average similarity: 51.14
Species	Av.Abund	Av.Sim	Sim/SD	Contrib%	Cum.%
Crustose coralline algae	0.92	5.59	2.17	10.94	10.94
Orange-red encrusting sponge	0.92	5.59	2.17	10.94	21.88
Yellow-green encrusting sponge	0.92	5.59	2.17	10.94	32.82
Sporochnus bolleanus	0.75	4.04	1.01	7.91	40.73
Caulerpa chemnitzia	0.75	3.64	1.08	7.12	47.85
Dasya spp.	0.75	3.61	1.08	7.06	54.91
Lobophora canariensis	0.75	3.58	1.08	7	61.91
Dictyopteris spp. /Dictyota spp.	0.67	2.72	0.85	5.33	67.23
Green filamentous algae	0.58	2.13	0.67	4.17	71.41
Group 90m
Average similarity: 62.08
Species	Av.Abund	Av.Sim	Sim/SD	Contrib%	Cum.%
Antipathes atlantica	1	5.52	5.83	8.89	8.89
Dictyopteris spp. /Dictyota spp.	1	5.52	5.83	8.89	17.79
Crustose coralline algae	1	5.52	5.83	8.89	26.68
Orange-red encrusting sponge	1	5.52	5.83	8.89	35.58
Yellow-green encrusting sponge	1	5.52	5.83	8.89	44.47
Sporochnus bolleanus	0.91	4.49	1.94	7.23	51.7
Cladophora sp.	0.82	3.62	1.3	5.83	57.53
Tanacetipathes tanacetum	0.73	2.77	0.97	4.47	62
Ellisella atlantica/elongata	0.73	2.66	0.99	4.29	66.29
Hydroid sp. 1	0.73	2.58	0.99	4.15	70.44
Group 150m
Average similarity: 68.72
Species	Av.Abund	Av.Sim	Sim/SD	Contrib%	Cum.%
Stichopathes spp.	1	7.66	9.69	11.14	11.14
Tanacetipathes tanacetum	1	7.66	9.69	11.14	22.29
Crustose coralline algae	1	7.66	9.69	11.14	33.43
Orange-red encrusting sponge	1	7.66	9.69	11.14	44.57
Yellow-green encrusting sponge	1	7.66	9.69	11.14	55.71
Antipathes atlantica	0.9	6.01	1.93	8.75	64.46
Dark green encruster	0.8	4.96	1.26	7.21	71.67
Group 200m
Average similarity: 65.17
Species	Av.Abund	Av.Sim	Sim/SD	Contrib%	Cum.%
Stichopathes spp.	1	7.4	5.12	11.36	11.36
Yellow-green encrusting sponge	1	7.4	5.12	11.36	22.72
Orange-red encrusting sponge	0.94	6.42	2.46	9.86	32.57
Hypnogorgia sp.	0.94	6.42	2.46	9.86	42.43
Parazonanthidae	0.89	5.76	1.77	8.84	51.27
Madracis myriaster	0.89	5.62	1.76	8.62	59.89
Crustose coralline algae	0.83	4.86	1.39	7.46	67.35
Yellow encrusting sponge	0.78	4.09	1.17	6.28	73.62
Group 250m
Average similarity: 68.21
Species	Av.Abund	Av.Sim	Sim/SD	Contrib%	Cum.%
Stichopathes spp.	1	8.01	6.79	11.74	11.74
Distichopathes filix	1	8.01	6.79	11.74	23.48
Hypnogorgia sp.	1	8.01	6.79	11.74	35.22
Orange-red encrusting sponge	1	8.01	6.79	11.74	46.96
Yellow-green encrusting sponge	1	8.01	6.79	11.74	58.7
Madracis myriaster	0.91	6.47	1.99	9.48	68.18
Yellow encrusting sponge	0.82	4.99	1.35	7.32	75.5
Group 300m
Average similarity: 54.69
Species	Av.Abund	Av.Sim	Sim/SD	Contrib%	Cum.%
Stichopathes spp.	1	10.6	3.53	19.38	19.38
Ophiuroidea	1	10.6	3.53	19.38	38.75
Yellow encrusting sponge	0.78	6.11	1.06	11.18	49.93
Yellow-green encrusting sponge	0.78	5.3	1.11	9.69	59.62
Coleopleurus floridanus	0.67	5.27	0.79	9.63	69.25
Madracis myriaster	0.67	3.51	0.81	6.42	75.68
Groups 15m & 30m
Average dissimilarity = 24.14
	Group 15	Group 30
Species	Av.Abund	Av.Abund	Av.Diss	Diss/SD	Contrib%	Cum.%
Pseudoplexaura spp.	1	0	2.33	12.53	9.67	9.67
Plexaurella spp.	1	0.3	1.67	1.51	6.92	16.59
Orange-red encrusting sponge	0.3	1	1.64	1.51	6.78	23.37
Scolymia cubensis	0	0.7	1.62	1.51	6.69	30.06
Lobophora canariensis	0.4	1	1.42	1.21	5.88	35.95
Plexaura homomalla	0.6	0.4	1.22	1.03	5.04	40.98
Eunicea spp.	1	0.5	1.2	0.99	4.96	45.94
Palythoa caribaeorum	0.9	0.5	1.19	0.99	4.95	50.89
Madracis spp.	0.5	1	1.18	0.99	4.88	55.77
Cerithium sp.	0.2	0.5	1.15	0.99	4.77	60.54
Aplysina cauliformis	0.6	0.6	1.13	0.95	4.69	65.23
Meandrina meandrites	0.6	0.7	1.09	0.91	4.51	69.74
Stephanocoeania intersepta/Siderastrea radians	0.6	0.9	1.03	0.84	4.28	74.02
Groups 15m & 60m
Average dissimilarity = 79.51
	Group 15	Group 60
Species	Av.Abund	Av.Abund	Av.Diss	Diss/SD	Contrib%	Cum.%
Orbicella franksi	1	0	2.88	6.12	3.63	3.63
Diploria labyrinthiformis	1	0	2.88	6.12	3.63	7.25
Pseudodiploria strigosa	1	0	2.88	6.12	3.63	10.88
Porites astreoides	1	0	2.88	6.12	3.63	14.51
Antillogorgia spp.	1	0	2.88	6.12	3.63	18.14
Plexaurella spp.	1	0	2.88	6.12	3.63	21.76
Pseudoplexaura spp.	1	0	2.88	6.12	3.63	25.39
Aplysina fistularis	1	0	2.88	6.12	3.63	29.02
Palythoa caribaeorum	0.9	0	2.55	2.69	3.21	32.23
Eunicea spp.	1	0.17	2.41	2.05	3.04	35.27
Brown fleshy crust	1	0.17	2.4	2.05	3.02	38.29
Millepora alcicornis	0.8	0	2.25	1.89	2.83	41.11
Montastraea cavernosa	1	0.25	2.2	1.63	2.77	43.88
Sporochnus bolleanus	0	0.75	2.16	1.62	2.72	46.6
Caulerpa chemnitzia	0	0.75	2.07	1.7	2.61	49.2
Dasya spp.	0	0.75	2.06	1.7	2.6	51.8
Agaricia fragilis	0.7	0	1.96	1.47	2.47	54.27
Orange-red encrusting sponge	0.3	0.92	1.88	1.38	2.37	56.63
Plexaura homomalla	0.6	0	1.71	1.18	2.15	58.78
Meandrina meandrites	0.6	0	1.68	1.19	2.11	60.9
Stephanocoeania intersepta/Siderastrea radians	0.6	0	1.63	1.19	2.05	62.95
Aplysina cauliformis	0.6	0	1.63	1.19	2.05	65
Green filamentous algae	0	0.58	1.62	1.17	2.03	67.03
Lobophora canariensis	0.4	0.75	1.58	1.08	1.98	69.01
Verdigellas peltata	0	0.58	1.57	1.17	1.97	70.98
Groups 30m & 60m
Average dissimilarity = 72.84
	Group 30	Group 60
Species	Av.Abund	Av.Abund	Av.Diss	Diss/SD	Contrib%	Cum.%
Madracis spp.	1	0	2.85	6.53	3.92	3.92
Orbicella franksi	1	0	2.85	6.53	3.92	7.83
Pseudodiploria strigosa	1	0	2.85	6.53	3.92	11.75
Porites astreoides	1	0	2.85	6.53	3.92	15.67
Antillogorgia spp.	1	0	2.85	6.53	3.92	19.58
Aplysina fistularis	1	0	2.85	6.53	3.92	23.5
Millepora alcicornis	1	0	2.85	6.53	3.92	27.41
Stephanocoeania intersepta/Siderastrea radians	0.9	0	2.55	2.69	3.51	30.92
Agaricia fragilis	0.9	0	2.53	2.71	3.48	34.4
Diploria labyrinthiformis	0.9	0	2.53	2.71	3.48	37.88
Brown fleshy crust	1	0.17	2.38	2.07	3.26	41.14
Montastraea cavernosa	1	0.25	2.17	1.64	2.99	44.13
Sporochnus bolleanus	0	0.75	2.14	1.63	2.93	47.06
Caulerpa chemnitzia	0	0.75	2.05	1.7	2.82	49.87
Dasya spp.	0	0.75	2.04	1.7	2.81	52.68
Scolymia cubensis	0.7	0	1.97	1.47	2.7	55.38
Meandrina meandrites	0.7	0	1.96	1.46	2.7	58.08
Aplysina cauliformis	0.6	0	1.75	1.18	2.4	60.48
Green filamentous algae	0	0.58	1.6	1.17	2.2	62.68
Verdigellas peltata	0.1	0.58	1.53	1.13	2.1	64.77
Caulerpa mexicana	0	0.5	1.48	0.96	2.03	66.81
Caulerpa mexicana	0	0.5	1.48	0.96	2.03	68.84
Cerithium sp.	0.5	0.33	1.41	0.98	1.94	70.78
Groups 15m & 90m
Average dissimilarity = 82.59
	Group 15	Group 90
Species	Av.Abund	Av.Abund	Av.Diss	Diss/SD	Contrib%	Cum.%
Orbicella franksi	1	0	2.54	7.37	3.08	3.08
Montastraea cavernosa	1	0	2.54	7.37	3.08	6.16
Diploria labyrinthiformis	1	0	2.54	7.37	3.08	9.24
Pseudodiploria strigosa	1	0	2.54	7.37	3.08	12.32
Porites astreoides	1	0	2.54	7.37	3.08	15.39
Antipathes atlantica	0	1	2.54	7.37	3.08	18.47
Antillogorgia spp.	1	0	2.54	7.37	3.08	21.55
Eunicea spp.	1	0	2.54	7.37	3.08	24.63
Plexaurella spp.	1	0	2.54	7.37	3.08	27.71
Pseudoplexaura spp.	1	0	2.54	7.37	3.08	30.79
Brown fleshy crust	1	0	2.54	7.37	3.08	33.87
Aplysina fistularis	1	0	2.54	7.37	3.08	36.95
Sporochnus bolleanus	0	0.91	2.3	2.86	2.79	39.74
Palythoa caribaeorum	0.9	0	2.26	2.77	2.73	42.47
Cladophora sp.	0	0.82	2.08	2	2.52	44.99
Millepora alcicornis	0.8	0	1.99	1.92	2.41	47.4
Tanacetipathes tanacetum	0	0.73	1.84	1.56	2.23	49.63
Ellisella atlantica/elongata	0	0.73	1.8	1.59	2.18	51.81
Orange-red encrusting sponge	0.3	1	1.78	1.48	2.16	53.97
Hydroid sp. 1	0	0.73	1.78	1.59	2.15	56.12
Agaricia fragilis	0.7	0	1.74	1.48	2.1	58.22
Membranous red blades	0	0.64	1.53	1.29	1.85	60.07
Plexaura homomalla	0.6	0	1.51	1.19	1.83	61.9
Meandrina meandrites	0.6	0	1.49	1.2	1.8	63.7
Stephanocoeania intersepta/Siderastrea radians	0.6	0	1.45	1.2	1.75	65.46
Aplysina cauliformis	0.6	0	1.45	1.2	1.75	67.21
Leptogorgia sp.	0	0.55	1.38	1.06	1.67	68.88
Galaxaura sp.	0	0.55	1.36	1.07	1.65	70.53
Groups 30m & 90m
Average dissimilarity = 77.11
	Group 30	Group 90
Species	Av.Abund	Av.Abund	Av.Diss	Diss/SD	Contrib%	Cum.%
Madracis spp.	1	0	2.52	7.83	3.27	3.27
Orbicella franksi	1	0	2.52	7.83	3.27	6.53
Montastraea cavernosa	1	0	2.52	7.83	3.27	9.8
Pseudodiploria strigosa	1	0	2.52	7.83	3.27	13.07
Porites astreoides	1	0	2.52	7.83	3.27	16.34
Antipathes atlantica	0	1	2.52	7.83	3.27	19.6
Antillogorgia spp.	1	0	2.52	7.83	3.27	22.87
Brown fleshy crust	1	0	2.52	7.83	3.27	26.14
Aplysina fistularis	1	0	2.52	7.83	3.27	29.41
Millepora alcicornis	1	0	2.52	7.83	3.27	32.67
Sporochnus bolleanus	0	0.91	2.28	2.88	2.96	35.64
Stephanocoeania intersepta/Siderastrea radians	0.9	0	2.26	2.77	2.93	38.56
Agaricia fragilis	0.9	0	2.24	2.79	2.91	41.47
Diploria labyrinthiformis	0.9	0	2.24	2.79	2.91	44.38
Cladophora sp.	0	0.82	2.06	2.01	2.68	47.05
Tanacetipathes tanacetum	0	0.73	1.82	1.57	2.36	49.42
Ellisella atlantica/elongata	0	0.73	1.79	1.59	2.32	51.74
Hydroid sp. 1	0	0.73	1.76	1.59	2.28	54.02
Scolymia cubensis	0.7	0	1.74	1.48	2.26	56.28
Meandrina meandrites	0.7	0	1.74	1.48	2.25	58.53
Aplysina cauliformis	0.6	0	1.54	1.19	2	60.53
Membranous red blades	0	0.64	1.52	1.3	1.97	62.5
Lobophora canariensis	1	0.45	1.44	1.08	1.87	64.37
Leptogorgia sp.	0	0.55	1.37	1.06	1.78	66.15
Galaxaura sp.	0	0.55	1.35	1.07	1.75	67.9
Green filamentous algae	0	0.55	1.34	1.07	1.74	69.64
Stichopathes spp.	0	0.55	1.33	1.08	1.72	71.36
Groups 60m & 90m
Average dissimilarity = 56.06
	Group 60	Group 90
Species	Av.Abund	Av.Abund	Av.Diss	Diss/SD	Contrib%	Cum.%
Antipathes atlantica	0.17	1	2.65	1.91	4.73	4.73
Ellisella atlantica/elongata	0	0.73	2.24	1.52	4	8.73
Tanacetipathes tanacetum	0.25	0.73	1.95	1.16	3.48	12.21
Caulerpa chemnitzia	0.75	0.27	1.94	1.22	3.46	15.67
Hydroid sp. 1	0.25	0.73	1.9	1.19	3.38	19.05
Leptogorgia sp.	0	0.55	1.74	1.01	3.1	22.16
Galaxaura sp.	0	0.55	1.7	1.04	3.03	25.18
Lobophora canariensis	0.75	0.45	1.69	1.01	3.01	28.2
Dasya spp.	0.75	0.45	1.69	1.01	3.01	31.21
Caulerpa mexicana	0.5	0	1.67	0.93	2.98	34.19
Caulerpa mexicana	0.5	0	1.67	0.93	2.98	37.17
Cladophora sp.	0.5	0.82	1.66	0.93	2.96	40.13
Stichopathes spp.	0.08	0.55	1.65	1.03	2.94	43.07
Ellisella grandis	0	0.55	1.63	1.05	2.91	45.99
Membranous red blades	0.5	0.64	1.6	0.96	2.85	48.84
Verdigellas peltata	0.58	0.55	1.58	0.95	2.82	51.66
Green filamentous algae	0.58	0.55	1.58	0.94	2.82	54.48
Red sieve encrusting sponge, cf. Phorbas amaranthus	0.5	0	1.51	0.97	2.68	57.16
White-brown encrusting sponge	0.17	0.45	1.45	0.91	2.59	59.75
Antipathes furcata	0	0.45	1.43	0.87	2.54	62.3
Peyssonnelia spp.	0.33	0.36	1.38	0.88	2.47	64.76
Tanacetipathes hirta	0	0.45	1.34	0.88	2.38	67.15
Light-green encrusting sponge	0.33	0.27	1.33	0.83	2.37	69.52
Codium sp.	0.25	0.36	1.29	0.85	2.3	71.82
Groups 15m & 150m
Average dissimilarity = 87.21
	Group 15	Group 150
Species	Av.Abund	Av.Abund	Av.Diss	Diss/SD	Contrib%	Cum.%
Orbicella franksi	1	0	2.92	10.21	3.35	3.35
Montastraea cavernosa	1	0	2.92	10.21	3.35	6.69
Diploria labyrinthiformis	1	0	2.92	10.21	3.35	10.04
Pseudodiploria strigosa	1	0	2.92	10.21	3.35	13.38
Porites astreoides	1	0	2.92	10.21	3.35	16.73
Stichopathes spp.	0	1	2.92	10.21	3.35	20.07
Tanacetipathes tanacetum	0	1	2.92	10.21	3.35	23.42
Antillogorgia spp.	1	0	2.92	10.21	3.35	26.76
Eunicea spp.	1	0	2.92	10.21	3.35	30.11
Plexaurella spp.	1	0	2.92	10.21	3.35	33.45
Pseudoplexaura spp.	1	0	2.92	10.21	3.35	36.8
Dictyopteris spp. /Dictyota spp.	1	0	2.92	10.21	3.35	40.14
Brown fleshy crust	1	0	2.92	10.21	3.35	43.49
Aplysina fistularis	1	0	2.92	10.21	3.35	46.83
Antipathes atlantica	0	0.9	2.61	2.86	2.99	49.82
Palythoa caribaeorum	0.9	0	2.58	2.88	2.96	52.78
Dark green encruster	0	0.8	2.37	1.95	2.72	55.5
Millepora alcicornis	0.8	0	2.27	1.95	2.61	58.11
Orange-red encrusting sponge	0.3	1	2.04	1.5	2.34	60.45
Yellow encrusting sponge	0	0.7	2.03	1.49	2.33	62.78
Parazonanthidae	0	0.7	2.01	1.5	2.31	65.09
Agaricia fragilis	0.7	0	1.99	1.5	2.28	67.37
Antipathes furcata	0	0.6	1.73	1.21	1.98	69.35
Plexaura homomalla	0.6	0	1.73	1.21	1.98	71.33
Groups 30m & 150m
Average dissimilarity = 82.68
	Group 30	Group 150
Species	Av.Abund	Av.Abund	Av.Diss	Diss/SD	Contrib%	Cum.%
Madracis spp.	1	0	2.89	11.78	3.49	3.49
Orbicella franksi	1	0	2.89	11.78	3.49	6.98
Montastraea cavernosa	1	0	2.89	11.78	3.49	10.47
Pseudodiploria strigosa	1	0	2.89	11.78	3.49	13.96
Porites astreoides	1	0	2.89	11.78	3.49	17.45
Stichopathes spp.	0	1	2.89	11.78	3.49	20.94
Tanacetipathes tanacetum	0	1	2.89	11.78	3.49	24.43
Antillogorgia spp.	1	0	2.89	11.78	3.49	27.92
Dictyopteris spp. /Dictyota spp.	1	0	2.89	11.78	3.49	31.41
Lobophora canariensis	1	0	2.89	11.78	3.49	34.9
Brown fleshy crust	1	0	2.89	11.78	3.49	38.39
Aplysina fistularis	1	0	2.89	11.78	3.49	41.88
Millepora alcicornis	1	0	2.89	11.78	3.49	45.37
Stephanocoeania intersepta/Siderastrea radians	0.9	0	2.58	2.88	3.12	48.5
Antipathes atlantica	0	0.9	2.58	2.89	3.12	51.62
Agaricia fragilis	0.9	0	2.56	2.9	3.1	54.72
Diploria labyrinthiformis	0.9	0	2.56	2.9	3.1	57.82
Dark green encruster	0	0.8	2.34	1.96	2.83	60.65
Yellow encrusting sponge	0	0.7	2.01	1.5	2.43	63.08
Scolymia cubensis	0.7	0	1.99	1.51	2.41	65.49
Parazonanthidae	0	0.7	1.99	1.5	2.41	67.9
Meandrina meandrites	0.7	0	1.99	1.5	2.4	70.31
Groups 60m & 150m
Average dissimilarity = 76.65
	Group 60	Group 150
Species	Av.Abund	Av.Abund	Av.Diss	Diss/SD	Contrib%	Cum.%
Stichopathes spp.	0.08	1	3.5	2.58	4.56	4.56
Dark green encruster	0	0.8	3.11	1.79	4.05	8.61
Antipathes atlantica	0.17	0.9	2.89	1.62	3.77	12.38
Tanacetipathes tanacetum	0.25	1	2.86	1.54	3.73	16.11
Sporochnus bolleanus	0.75	0	2.86	1.54	3.73	19.83
Caulerpa chemnitzia	0.75	0	2.68	1.69	3.49	23.33
Dasya spp.	0.75	0	2.67	1.69	3.48	26.8
Lobophora canariensis	0.75	0	2.65	1.69	3.46	30.27
Yellow encrusting sponge	0	0.7	2.65	1.4	3.45	33.72
Parazonanthidae	0	0.7	2.61	1.41	3.41	37.13
Dictyopteris spp. /Dictyota spp.	0.67	0	2.33	1.39	3.04	40.17
Antipathes furcata	0	0.6	2.24	1.16	2.93	43.09
Creamy-white encrusting sponge	0	0.6	2.24	1.15	2.93	46.02
Green filamentous algae	0.58	0	2.09	1.17	2.72	48.75
Caulerpa mexicana	0.5	0	2.01	0.93	2.63	51.37
Caulerpa mexicana	0.5	0	2.01	0.93	2.63	54
Verdigellas peltata	0.58	0	2.01	1.17	2.62	56.62
Viminella sp.	0	0.5	1.86	0.95	2.43	59.05
Placogorgia spp.	0	0.5	1.86	0.95	2.43	61.48
Membranous red blades	0.5	0	1.78	0.99	2.32	63.8
Red sieve encrusting sponge, cf. Phorbas amaranthus	0.5	0	1.77	0.99	2.31	66.11
Cladophora sp.	0.5	0	1.76	0.99	2.29	68.4
Tanacetipathes hirta	0	0.4	1.47	0.78	1.91	70.31
Groups 90m & 150m
Average dissimilarity = 61.85
	Group 90	Group 150
Species	Av.Abund	Av.Abund	Av.Diss	Diss/SD	Contrib%	Cum.%
Dictyopteris spp. /Dictyota spp.	1	0	3.22	6.15	5.21	5.21
Sporochnus bolleanus	0.91	0	2.92	2.75	4.72	9.93
Cladophora sp.	0.82	0	2.64	1.96	4.27	14.21
Dark green encruster	0	0.8	2.62	1.88	4.24	18.45
Yellow encrusting sponge	0	0.7	2.24	1.45	3.63	22.07
Hydroid sp. 1	0.73	0	2.22	1.58	3.59	25.67
Parazonanthidae	0.09	0.7	2.12	1.35	3.43	29.09
Membranous red blades	0.64	0	1.91	1.29	3.09	32.18
Creamy-white encrusting sponge	0	0.6	1.91	1.18	3.08	35.26
Ellisella atlantica/elongata	0.73	0.4	1.77	1.07	2.86	38.12
Leptogorgia sp.	0.55	0	1.75	1.04	2.84	40.96
Galaxaura sp.	0.55	0	1.72	1.07	2.77	43.73
Green filamentous algae	0.55	0	1.71	1.07	2.76	46.49
Ellisella grandis	0.55	0	1.65	1.07	2.67	49.16
Verdigellas peltata	0.55	0	1.64	1.07	2.66	51.82
Antipathes furcata	0.45	0.6	1.64	0.99	2.66	54.48
Viminella sp.	0	0.5	1.58	0.97	2.56	57.03
Placogorgia spp.	0	0.5	1.58	0.97	2.56	59.59
Tanacetipathes hirta	0.45	0.4	1.55	0.96	2.51	62.1
Stichopathes spp.	0.55	1	1.54	0.89	2.5	64.59
White-brown encrusting sponge	0.45	0	1.41	0.9	2.29	66.88
Dasya spp.	0.45	0	1.36	0.89	2.2	69.08
Lobophora canariensis	0.45	0	1.35	0.89	2.18	71.26
Groups 15m & 200m
Average dissimilarity = 88.44
	Group 15	Group 200
Species	Av.Abund	Av.Abund	Av.Diss	Diss/SD	Contrib%	Cum.%
Orbicella franksi	1	0	2.87	7.5	3.25	3.25
Montastraea cavernosa	1	0	2.87	7.5	3.25	6.5
Diploria labyrinthiformis	1	0	2.87	7.5	3.25	9.75
Pseudodiploria strigosa	1	0	2.87	7.5	3.25	13
Porites astreoides	1	0	2.87	7.5	3.25	16.25
Stichopathes spp.	0	1	2.87	7.5	3.25	19.49
Antillogorgia spp.	1	0	2.87	7.5	3.25	22.74
Eunicea spp.	1	0	2.87	7.5	3.25	25.99
Plexaurella spp.	1	0	2.87	7.5	3.25	29.24
Pseudoplexaura spp.	1	0	2.87	7.5	3.25	32.49
Dictyopteris spp. /Dictyota spp.	1	0	2.87	7.5	3.25	35.74
Brown fleshy crust	1	0	2.87	7.5	3.25	38.99
Aplysina fistularis	1	0	2.87	7.5	3.25	42.24
Hypnogorgia sp.	0	0.94	2.69	3.6	3.04	45.28
Parazonanthidae	0	0.89	2.55	2.63	2.88	48.16
Palythoa caribaeorum	0.9	0	2.55	2.78	2.88	51.04
Madracis myriaster	0	0.89	2.52	2.62	2.85	53.89
Millepora alcicornis	0.8	0	2.24	1.92	2.53	56.42
Yellow encrusting sponge	0	0.78	2.17	1.8	2.46	58.88
Distichopathes filix	0	0.72	2.02	1.56	2.28	61.16
Agaricia fragilis	0.7	0	1.96	1.49	2.21	63.37
Orange-red encrusting sponge	0.3	0.94	1.94	1.41	2.19	65.57
Ophiuroidea	0	0.67	1.88	1.37	2.13	67.7
Placogorgia spp.	0	0.67	1.84	1.38	2.08	69.78
Plexaura homomalla	0.6	0	1.7	1.2	1.92	71.71
Groups 30m & 200m
Average dissimilarity = 84.33
	Group 30	Group 200
Species	Av.Abund	Av.Abund	Av.Diss	Diss/SD	Contrib%	Cum.%
Madracis spp.	1	0	2.84	8.12	3.37	3.37
Orbicella franksi	1	0	2.84	8.12	3.37	6.74
Montastraea cavernosa	1	0	2.84	8.12	3.37	10.11
Pseudodiploria strigosa	1	0	2.84	8.12	3.37	13.48
Porites astreoides	1	0	2.84	8.12	3.37	16.85
Stichopathes spp.	0	1	2.84	8.12	3.37	20.23
Antillogorgia spp.	1	0	2.84	8.12	3.37	23.6
Dictyopteris spp. /Dictyota spp.	1	0	2.84	8.12	3.37	26.97
Lobophora canariensis	1	0	2.84	8.12	3.37	30.34
Brown fleshy crust	1	0	2.84	8.12	3.37	33.71
Aplysina fistularis	1	0	2.84	8.12	3.37	37.08
Millepora alcicornis	1	0	2.84	8.12	3.37	40.45
Hypnogorgia sp.	0	0.94	2.66	3.66	3.16	43.61
Stephanocoeania intersepta/Siderastrea radians	0.9	0	2.55	2.79	3.02	46.62
Agaricia fragilis	0.9	0	2.53	2.81	3	49.62
Diploria labyrinthiformis	0.9	0	2.53	2.81	3	52.61
Parazonanthidae	0	0.89	2.52	2.66	2.99	55.6
Madracis myriaster	0	0.89	2.5	2.65	2.96	58.56
Yellow encrusting sponge	0	0.78	2.15	1.81	2.55	61.11
Distichopathes filix	0	0.72	2	1.56	2.37	63.48
Scolymia cubensis	0.7	0	1.96	1.49	2.33	65.81
Meandrina meandrites	0.7	0	1.96	1.49	2.32	68.13
Ophiuroidea	0	0.67	1.87	1.38	2.21	70.34
Groups 60m & 200m
Average dissimilarity = 80.86
	Group 60	Group 200
Species	Av.Abund	Av.Abund	Av.Diss	Diss/SD	Contrib%	Cum.%
Hypnogorgia sp.	0	0.94	3.49	2.79	4.32	4.32
Stichopathes spp.	0.08	1	3.44	2.42	4.26	8.58
Parazonanthidae	0	0.89	3.32	2.24	4.1	12.68
Madracis myriaster	0	0.89	3.27	2.23	4.05	16.72
Sporochnus bolleanus	0.75	0	2.81	1.49	3.48	20.2
Yellow encrusting sponge	0	0.78	2.8	1.66	3.46	23.67
Caulerpa chemnitzia	0.75	0	2.63	1.65	3.26	26.92
Dasya spp.	0.75	0	2.62	1.65	3.24	30.17
Lobophora canariensis	0.75	0	2.61	1.66	3.23	33.4
Distichopathes filix	0	0.72	2.61	1.45	3.22	36.62
Ophiuroidea	0	0.67	2.44	1.29	3.02	39.64
Placogorgia spp.	0	0.67	2.37	1.3	2.93	42.57
Dictyopteris spp. /Dictyota spp.	0.67	0	2.29	1.37	2.84	45.4
Green filamentous algae	0.58	0	2.05	1.15	2.54	47.95
Caulerpa mexicana	0.5	0	1.98	0.91	2.45	50.4
Caulerpa mexicana	0.5	0	1.98	0.91	2.45	52.85
Verdigellas peltata	0.58	0	1.98	1.16	2.45	55.3
Creamy-white encrusting sponge	0	0.56	1.87	1.07	2.32	57.61
Membranous red blades	0.5	0	1.75	0.98	2.16	59.78
Red sieve encrusting sponge, cf. Phorbas amaranthus	0.5	0	1.74	0.98	2.15	61.93
Cladophora sp.	0.5	0	1.73	0.98	2.14	64.07
Nicella sp.	0	0.44	1.52	0.86	1.88	65.94
Antipathes atlantica	0.17	0.33	1.41	0.77	1.75	67.69
Dark green encruster	0	0.39	1.35	0.77	1.67	69.36
Tanacetipathes tanacetum	0.25	0.22	1.31	0.73	1.62	70.98
Groups 90m & 200m
Average dissimilarity = 73.19
	Group 90	Group 200
Species	Av.Abund	Av.Abund	Av.Diss	Diss/SD	Contrib%	Cum.%
Dictyopteris spp. /Dictyota spp.	1	0	3.17	5.18	4.33	4.33
Hypnogorgia sp.	0	0.94	2.97	3.21	4.05	8.39
Sporochnus bolleanus	0.91	0	2.88	2.64	3.93	12.32
Parazonanthidae	0.09	0.89	2.61	1.93	3.56	15.88
Cladophora sp.	0.82	0	2.6	1.91	3.56	19.43
Yellow encrusting sponge	0	0.78	2.39	1.74	3.27	22.7
Distichopathes filix	0	0.72	2.22	1.51	3.03	25.74
Hydroid sp. 1	0.73	0	2.19	1.56	2.99	28.73
Antipathes atlantica	1	0.33	2.16	1.34	2.96	31.68
Madracis myriaster	0.27	0.89	2.11	1.39	2.88	34.56
Ophiuroidea	0	0.67	2.08	1.34	2.84	37.4
Ellisella atlantica/elongata	0.73	0.17	2.04	1.32	2.79	40.19
Placogorgia spp.	0	0.67	2.02	1.35	2.77	42.96
Tanacetipathes tanacetum	0.73	0.22	2.01	1.22	2.74	45.7
Membranous red blades	0.64	0	1.88	1.28	2.57	48.27
Leptogorgia sp.	0.55	0	1.73	1.03	2.36	50.63
Galaxaura sp.	0.55	0	1.69	1.06	2.31	52.94
Green filamentous algae	0.55	0	1.68	1.06	2.3	55.24
Ellisella grandis	0.55	0	1.63	1.06	2.22	57.46
Verdigellas peltata	0.55	0	1.62	1.06	2.21	59.67
Creamy-white encrusting sponge	0	0.56	1.62	1.08	2.21	61.88
Stichopathes spp.	0.55	1	1.52	0.88	2.08	63.95
Antipathes furcata	0.45	0.11	1.45	0.9	1.98	65.93
White-brown encrusting sponge	0.45	0	1.39	0.9	1.9	67.84
Tanacetipathes hirta	0.45	0.06	1.36	0.9	1.85	69.69
Dasya spp.	0.45	0	1.34	0.89	1.83	71.52
Groups 150m & 200m
Average dissimilarity = 45.76
	Group 150	Group 200
Species	Av.Abund	Av.Abund	Av.Diss	Diss/SD	Contrib%	Cum.%
Hypnogorgia sp.	0.1	0.94	3.21	2.24	7.02	7.02
Tanacetipathes tanacetum	1	0.22	3.01	1.77	6.57	13.6
Madracis myriaster	0.1	0.89	2.99	1.94	6.54	20.13
Ophiuroidea	0	0.67	2.46	1.36	5.38	25.51
Antipathes atlantica	0.9	0.33	2.43	1.27	5.31	30.82
Dark green encruster	0.8	0.39	2.22	1.11	4.85	35.67
Distichopathes filix	0.3	0.72	2.19	1.16	4.79	40.46
Antipathes furcata	0.6	0.11	2.16	1.14	4.72	45.19
Placogorgia spp.	0.5	0.67	1.89	0.98	4.14	49.32
Creamy-white encrusting sponge	0.6	0.56	1.88	0.96	4.11	53.43
Viminella sp.	0.5	0.17	1.86	0.97	4.06	57.49
Nicella sp.	0.4	0.44	1.79	0.96	3.91	61.4
Asteroidea sp. 2	0.3	0.33	1.61	0.85	3.51	64.91
Ellisella atlantica/elongata	0.4	0.17	1.54	0.86	3.36	68.27
Yellow encrusting sponge	0.7	0.78	1.52	0.78	3.32	71.59
Groups 15m & 250m
Average dissimilarity = 89.89
	Group 15	Group 250
Species	Av.Abund	Av.Abund	Av.Diss	Diss/SD	Contrib%	Cum.%
Orbicella franksi	1	0	2.97	8.8	3.3	3.3
Montastraea cavernosa	1	0	2.97	8.8	3.3	6.6
Diploria labyrinthiformis	1	0	2.97	8.8	3.3	9.9
Pseudodiploria strigosa	1	0	2.97	8.8	3.3	13.19
Porites astreoides	1	0	2.97	8.8	3.3	16.49
Stichopathes spp.	0	1	2.97	8.8	3.3	19.79
Distichopathes filix	0	1	2.97	8.8	3.3	23.09
Antillogorgia spp.	1	0	2.97	8.8	3.3	26.39
Eunicea spp.	1	0	2.97	8.8	3.3	29.69
Hypnogorgia sp.	0	1	2.97	8.8	3.3	32.99
Plexaurella spp.	1	0	2.97	8.8	3.3	36.29
Pseudoplexaura spp.	1	0	2.97	8.8	3.3	39.58
Dictyopteris spp. /Dictyota spp.	1	0	2.97	8.8	3.3	42.88
Brown fleshy crust	1	0	2.97	8.8	3.3	46.18
Aplysina fistularis	1	0	2.97	8.8	3.3	49.48
Madracis myriaster	0	0.91	2.68	2.94	2.98	52.46
Palythoa caribaeorum	0.9	0	2.63	2.84	2.92	55.39
Yellow encrusting sponge	0	0.82	2.38	2.06	2.65	58.04
Millepora alcicornis	0.8	0	2.31	1.94	2.57	60.61
Orange-red encrusting sponge	0.3	1	2.08	1.49	2.31	62.92
Agaricia fragilis	0.7	0	2.02	1.5	2.24	65.16
Parazonanthidae	0	0.64	1.86	1.29	2.07	67.23
Placogorgia spp.	0	0.64	1.82	1.3	2.02	69.26
Ophiuroidea	0	0.64	1.82	1.3	2.02	71.28
Groups 30m & 250m
Average dissimilarity = 85.60
	Group 30	Group 250
Species	Av.Abund	Av.Abund	Av.Diss	Diss/SD	Contrib%	Cum.%
Madracis spp.	1	0	2.93	9.86	3.43	3.43
Orbicella franksi	1	0	2.93	9.86	3.43	6.85
Montastraea cavernosa	1	0	2.93	9.86	3.43	10.28
Pseudodiploria strigosa	1	0	2.93	9.86	3.43	13.7
Porites astreoides	1	0	2.93	9.86	3.43	17.13
Stichopathes spp.	0	1	2.93	9.86	3.43	20.55
Distichopathes filix	0	1	2.93	9.86	3.43	23.98
Antillogorgia spp.	1	0	2.93	9.86	3.43	27.41
Hypnogorgia sp.	0	1	2.93	9.86	3.43	30.83
Dictyopteris spp. /Dictyota spp.	1	0	2.93	9.86	3.43	34.26
Lobophora canariensis	1	0	2.93	9.86	3.43	37.68
Brown fleshy crust	1	0	2.93	9.86	3.43	41.11
Aplysina fistularis	1	0	2.93	9.86	3.43	44.53
Millepora alcicornis	1	0	2.93	9.86	3.43	47.96
Madracis myriaster	0	0.91	2.65	2.98	3.1	51.06
Stephanocoeania intersepta/Siderastrea radians	0.9	0	2.62	2.84	3.07	54.13
Agaricia fragilis	0.9	0	2.6	2.86	3.04	57.17
Diploria labyrinthiformis	0.9	0	2.6	2.86	3.04	60.21
Yellow encrusting sponge	0	0.82	2.36	2.07	2.76	62.97
Scolymia cubensis	0.7	0	2.02	1.5	2.36	65.33
Meandrina meandrites	0.7	0	2.02	1.49	2.36	67.69
Parazonanthidae	0	0.64	1.84	1.29	2.15	69.84
Placogorgia spp.	0	0.64	1.8	1.31	2.1	71.94
Groups 60m & 250m
Average dissimilarity = 82.56
	Group 60	Group 250
Species	Av.Abund	Av.Abund	Av.Diss	Diss/SD	Contrib%	Cum.%
Distichopathes filix	0	1	3.9	3.96	4.72	4.72
Hypnogorgia sp.	0	1	3.9	3.96	4.72	9.44
Stichopathes spp.	0.08	1	3.58	2.45	4.34	13.78
Madracis myriaster	0	0.91	3.52	2.41	4.27	18.05
Yellow encrusting sponge	0	0.82	3.11	1.88	3.76	21.81
Sporochnus bolleanus	0.75	0	2.93	1.5	3.55	25.36
Caulerpa chemnitzia	0.75	0	2.73	1.67	3.31	28.67
Dasya spp.	0.75	0	2.72	1.67	3.3	31.97
Lobophora canariensis	0.75	0	2.71	1.68	3.28	35.25
Parazonanthidae	0	0.64	2.44	1.21	2.95	38.2
Dictyopteris spp. /Dictyota spp.	0.67	0	2.38	1.38	2.88	41.08
Placogorgia spp.	0	0.64	2.35	1.25	2.85	43.93
Ophiuroidea	0	0.64	2.35	1.25	2.85	46.78
Creamy-white encrusting sponge	0	0.64	2.33	1.25	2.82	49.6
Green filamentous algae	0.58	0	2.13	1.16	2.58	52.18
Crustose coralline algae	0.92	0.45	2.07	1.02	2.51	54.7
Caulerpa mexicana	0.5	0	2.07	0.91	2.51	57.2
Caulerpa mexicana	0.5	0	2.07	0.91	2.51	59.71
Verdigellas peltata	0.58	0	2.05	1.16	2.49	62.19
Membranous red blades	0.5	0	1.82	0.98	2.2	64.39
Red sieve encrusting sponge, cf. Phorbas amaranthus	0.5	0	1.81	0.98	2.19	66.58
Cladophora sp.	0.5	0	1.79	0.98	2.17	68.75
Nicella sp.	0	0.45	1.63	0.88	1.97	70.73
Groups 90m & 250m
Average dissimilarity = 75.80
	Group 90	Group 250
Species	Av.Abund	Av.Abund	Av.Diss	Diss/SD	Contrib%	Cum.%
Distichopathes filix	0	1	3.28	5.59	4.33	4.33
Hypnogorgia sp.	0	1	3.28	5.59	4.33	8.66
Dictyopteris spp. /Dictyota spp.	1	0	3.28	5.59	4.33	13
Sporochnus bolleanus	0.91	0	2.98	2.68	3.93	16.92
Cladophora sp.	0.82	0	2.69	1.93	3.55	20.48
Yellow encrusting sponge	0	0.82	2.63	1.98	3.47	23.95
Antipathes atlantica	1	0.27	2.38	1.53	3.14	27.09
Tanacetipathes tanacetum	0.73	0	2.38	1.52	3.14	30.23
Hydroid sp. 1	0.73	0	2.26	1.57	2.98	33.21
Madracis myriaster	0.27	0.91	2.22	1.44	2.93	36.14
Ellisella atlantica/elongata	0.73	0.18	2.06	1.3	2.72	38.87
Placogorgia spp.	0	0.64	2	1.28	2.64	41.51
Ophiuroidea	0	0.64	2	1.28	2.64	44.16
Parazonanthidae	0.09	0.64	1.99	1.2	2.62	46.78
Creamy-white encrusting sponge	0	0.64	1.99	1.28	2.62	49.4
Membranous red blades	0.64	0	1.94	1.28	2.56	51.96
Crustose coralline algae	1	0.45	1.79	1.05	2.36	54.32
Leptogorgia sp.	0.55	0	1.79	1.04	2.36	56.68
Galaxaura sp.	0.55	0	1.75	1.06	2.31	58.99
Green filamentous algae	0.55	0	1.74	1.06	2.29	61.28
Ellisella grandis	0.55	0	1.68	1.07	2.22	63.5
Verdigellas peltata	0.55	0	1.67	1.06	2.21	65.7
Stichopathes spp.	0.55	1	1.58	0.88	2.08	67.78
Antipathes furcata	0.45	0	1.47	0.89	1.94	69.72
White-brown encrusting sponge	0.45	0	1.44	0.9	1.9	71.62
Groups 150m & 250m
Average dissimilarity = 50.67
	Group 150	Group 250
Species	Av.Abund	Av.Abund	Av.Diss	Diss/SD	Contrib%	Cum.%
Tanacetipathes tanacetum	1	0	3.92	7.42	7.74	7.74
Hypnogorgia sp.	0.1	1	3.56	2.75	7.02	14.76
Madracis myriaster	0.1	0.91	3.2	2.07	6.31	21.08
Dark green encruster	0.8	0.18	2.79	1.45	5.51	26.59
Distichopathes filix	0.3	1	2.77	1.48	5.48	32.06
Antipathes atlantica	0.9	0.27	2.65	1.41	5.23	37.3
Ophiuroidea	0	0.64	2.37	1.3	4.69	41.98
Antipathes furcata	0.6	0	2.31	1.2	4.57	46.55
Crustose coralline algae	1	0.45	2.14	1.06	4.22	50.77
Placogorgia spp.	0.5	0.64	1.97	0.98	3.88	54.65
Viminella sp.	0.5	0	1.92	0.98	3.78	58.44
Creamy-white encrusting sponge	0.6	0.64	1.89	0.93	3.73	62.17
Nicella sp.	0.4	0.45	1.87	0.97	3.7	65.86
Parazonanthidae	0.7	0.64	1.78	0.88	3.51	69.37
Ellisella atlantica/elongata	0.4	0.18	1.64	0.86	3.24	72.62
Groups 200m & 250m
Average dissimilarity = 33.70
	Group 200	Group 250
Species	Av.Abund	Av.Abund	Av.Diss	Diss/SD	Contrib%	Cum.%
Crustose coralline algae	0.83	0.45	2.04	1.02	6.05	6.05
Creamy-white encrusting sponge	0.56	0.64	1.91	0.95	5.67	11.72
Nicella sp.	0.44	0.45	1.86	0.97	5.51	17.24
Placogorgia spp.	0.67	0.64	1.81	0.89	5.38	22.61
Ophiuroidea	0.67	0.64	1.8	0.89	5.34	27.96
Antipathes atlantica	0.33	0.27	1.61	0.84	4.77	32.73
Asteroidea sp. 4	0.33	0.27	1.59	0.83	4.72	37.45
Asteroidea sp. 2	0.33	0.27	1.58	0.83	4.69	42.14
Dark green encruster	0.39	0.18	1.56	0.85	4.64	46.78
Parazonanthidae	0.89	0.64	1.56	0.79	4.62	51.4
Yellow encrusting sponge	0.78	0.82	1.35	0.68	4.01	55.41
Purple encruster	0.22	0.27	1.32	0.76	3.91	59.31
Copidaster schismochilus	0.22	0.18	1.22	0.68	3.61	62.92
Distichopathes filix	0.72	1	1.17	0.61	3.48	66.4
Madrepora oculata	0.06	0.27	1.15	0.64	3.4	69.81
Callogorgia spp.	0.28	0.09	1.07	0.68	3.16	72.97
Groups 15m & 300m
Average dissimilarity = 93.65
	Group 15	Group 300
Species	Av.Abund	Av.Abund	Av.Diss	Diss/SD	Contrib%	Cum.%
Orbicella franksi	1	0	3.24	6.55	3.46	3.46
Montastraea cavernosa	1	0	3.24	6.55	3.46	6.93
Diploria labyrinthiformis	1	0	3.24	6.55	3.46	10.39
Pseudodiploria strigosa	1	0	3.24	6.55	3.46	13.86
Porites astreoides	1	0	3.24	6.55	3.46	17.32
Stichopathes spp.	0	1	3.24	6.55	3.46	20.79
Antillogorgia spp.	1	0	3.24	6.55	3.46	24.25
Eunicea spp.	1	0	3.24	6.55	3.46	27.71
Plexaurella spp.	1	0	3.24	6.55	3.46	31.18
Pseudoplexaura spp.	1	0	3.24	6.55	3.46	34.64
Dictyopteris spp. /Dictyota spp.	1	0	3.24	6.55	3.46	38.11
Brown fleshy crust	1	0	3.24	6.55	3.46	41.57
Aplysina fistularis	1	0	3.24	6.55	3.46	45.04
Ophiuroidea	0	1	3.24	6.55	3.46	48.5
Palythoa caribaeorum	0.9	0	2.87	2.72	3.06	51.56
Crustose coralline algae	0.9	0.11	2.66	1.96	2.84	54.4
Millepora alcicornis	0.8	0	2.52	1.9	2.69	57.09
Yellow encrusting sponge	0	0.78	2.52	1.76	2.69	59.78
Coleopleurus floridanus	0	0.67	2.28	1.36	2.43	62.21
Agaricia fragilis	0.7	0	2.2	1.47	2.35	64.56
Madracis myriaster	0	0.67	2.02	1.37	2.15	66.71
Hypnogorgia sp.	0	0.67	2.02	1.37	2.15	68.86
Plexaura homomalla	0.6	0	1.92	1.19	2.05	70.91
Groups 30m & 300m
Average dissimilarity = 91.36
	Group 30	Group 300
Species	Av.Abund	Av.Abund	Av.Diss	Diss/SD	Contrib%	Cum.%
Madracis spp.	1	0	3.2	7.12	3.51	3.51
Orbicella franksi	1	0	3.2	7.12	3.51	7.01
Montastraea cavernosa	1	0	3.2	7.12	3.51	10.52
Pseudodiploria strigosa	1	0	3.2	7.12	3.51	14.03
Porites astreoides	1	0	3.2	7.12	3.51	17.54
Stichopathes spp.	0	1	3.2	7.12	3.51	21.04
Antillogorgia spp.	1	0	3.2	7.12	3.51	24.55
Dictyopteris spp. /Dictyota spp.	1	0	3.2	7.12	3.51	28.06
Lobophora canariensis	1	0	3.2	7.12	3.51	31.56
Brown fleshy crust	1	0	3.2	7.12	3.51	35.07
Aplysina fistularis	1	0	3.2	7.12	3.51	38.58
Millepora alcicornis	1	0	3.2	7.12	3.51	42.09
Ophiuroidea	0	1	3.2	7.12	3.51	45.59
Crustose coralline algae	1	0.11	2.91	2.62	3.18	48.78
Stephanocoeania intersepta/Siderastrea radians	0.9	0	2.87	2.73	3.14	51.91
Agaricia fragilis	0.9	0	2.84	2.75	3.11	55.02
Diploria labyrinthiformis	0.9	0	2.84	2.75	3.11	58.13
Yellow encrusting sponge	0	0.78	2.48	1.78	2.72	60.85
Coleopleurus floridanus	0	0.67	2.25	1.37	2.46	63.31
Scolymia cubensis	0.7	0	2.21	1.48	2.42	65.73
Meandrina meandrites	0.7	0	2.2	1.47	2.41	68.14
Madracis myriaster	0	0.67	1.99	1.38	2.18	70.32
Groups 60m & 300m
Average dissimilarity = 88.88
	Group 60	Group 300
Species	Av.Abund	Av.Abund	Av.Diss	Diss/SD	Contrib%	Cum.%
Ophiuroidea	0	1	4.45	2.89	5.01	5.01
Stichopathes spp.	0.08	1	4.1	2.08	4.61	9.62
Crustose coralline algae	0.92	0.11	3.48	2.01	3.91	13.54
Yellow encrusting sponge	0	0.78	3.45	1.49	3.89	17.42
Sporochnus bolleanus	0.75	0	3.36	1.37	3.78	21.2
Coleopleurus floridanus	0	0.67	3.2	1.2	3.6	24.8
Caulerpa chemnitzia	0.75	0	3.07	1.62	3.45	28.25
Dasya spp.	0.75	0	3.05	1.63	3.43	31.68
Lobophora canariensis	0.75	0	3.03	1.63	3.41	35.09
Madracis myriaster	0	0.67	2.67	1.27	3.01	38.1
Hypnogorgia sp.	0	0.67	2.67	1.27	3.01	41.11
Dictyopteris spp. /Dictyota spp.	0.67	0	2.66	1.36	2.99	44.1
Caulerpa mexicana	0.5	0	2.4	0.86	2.7	46.8
Caulerpa mexicana	0.5	0	2.4	0.86	2.7	49.5
Green filamentous algae	0.58	0	2.39	1.14	2.69	52.19
Verdigellas peltata	0.58	0	2.29	1.14	2.58	54.77
Placogorgia spp.	0	0.56	2.19	1.03	2.47	57.23
Orange-red encrusting sponge	0.92	0.56	2.19	0.87	2.46	59.7
Distichopathes filix	0	0.56	2.11	1.05	2.38	62.08
Membranous red blades	0.5	0	2.04	0.97	2.29	64.37
Red sieve encrusting sponge, cf. Phorbas amaranthus	0.5	0	2.02	0.97	2.28	66.64
Cladophora sp.	0.5	0	2	0.97	2.25	68.9
Parazonanthidae	0	0.44	1.86	0.83	2.09	70.99
Groups 90m & 300m
Average dissimilarity = 83.11
	Group 90	Group 300
Species	Av.Abund	Av.Abund	Av.Diss	Diss/SD	Contrib%	Cum.%
Dictyopteris spp. /Dictyota spp.	1	0	3.64	4.42	4.38	4.38
Ophiuroidea	0	1	3.64	4.42	4.38	8.77
Crustose coralline algae	1	0.11	3.32	2.35	3.99	12.76
Sporochnus bolleanus	0.91	0	3.3	2.49	3.97	16.73
Cladophora sp.	0.82	0	2.99	1.85	3.6	20.33
Antipathes atlantica	1	0.22	2.95	1.68	3.55	23.87
Yellow encrusting sponge	0	0.78	2.82	1.67	3.4	27.27
Coleopleurus floridanus	0	0.67	2.58	1.31	3.1	30.37
Ellisella atlantica/elongata	0.73	0	2.55	1.53	3.06	33.43
Hydroid sp. 1	0.73	0	2.49	1.53	3	36.43
Tanacetipathes tanacetum	0.73	0.11	2.48	1.32	2.99	39.42
Hypnogorgia sp.	0	0.67	2.24	1.34	2.69	42.11
Membranous red blades	0.64	0	2.13	1.26	2.57	44.68
Madracis myriaster	0.27	0.67	2.01	1.09	2.42	47.1
Leptogorgia sp.	0.55	0	1.99	1.01	2.39	49.49
Galaxaura sp.	0.55	0	1.93	1.05	2.32	51.82
Green filamentous algae	0.55	0	1.92	1.05	2.31	54.13
Ellisella grandis	0.55	0	1.85	1.05	2.22	56.35
Placogorgia spp.	0	0.56	1.84	1.07	2.21	58.56
Verdigellas peltata	0.55	0	1.84	1.05	2.21	60.78
Orange-red encrusting sponge	1	0.56	1.8	0.86	2.17	62.95
Distichopathes filix	0	0.56	1.79	1.08	2.15	65.1
Stichopathes spp.	0.55	1	1.76	0.86	2.12	67.22
Antipathes furcata	0.45	0	1.62	0.88	1.95	69.17
Parazonanthidae	0.09	0.44	1.59	0.88	1.91	71.08
Groups 150m & 300m
Average dissimilarity = 62.00
	Group 150	Group 300
Species	Av.Abund	Av.Abund	Av.Diss	Diss/SD	Contrib%	Cum.%
Ophiuroidea	0	1	4.44	5.24	7.17	7.17
Crustose coralline algae	1	0.11	4.06	2.49	6.55	13.72
Tanacetipathes tanacetum	1	0.11	4.03	2.46	6.51	20.23
Dark green encruster	0.8	0.11	3.38	1.55	5.45	25.67
Antipathes atlantica	0.9	0.22	3.31	1.52	5.34	31.02
Coleopleurus floridanus	0	0.67	3.18	1.35	5.13	36.14
Antipathes furcata	0.6	0	2.61	1.18	4.22	40.36
Hypnogorgia sp.	0.1	0.67	2.6	1.27	4.19	44.55
Madracis myriaster	0.1	0.67	2.59	1.25	4.18	48.72
Creamy-white encrusting sponge	0.6	0.11	2.54	1.12	4.1	52.82
Parazonanthidae	0.7	0.44	2.35	1	3.79	56.62
Orange-red encrusting sponge	1	0.56	2.24	0.88	3.61	60.23
Placogorgia spp.	0.5	0.56	2.22	0.97	3.57	63.81
Distichopathes filix	0.3	0.56	2.18	1.01	3.52	67.32
Viminella sp.	0.5	0.11	2.18	0.96	3.51	70.83
Groups 200m & 300m
Average dissimilarity = 47.61
	Group 200	Group 300
Species	Av.Abund	Av.Abund	Av.Diss	Diss/SD	Contrib%	Cum.%
Crustose coralline algae	0.83	0.11	3.31	1.6	6.96	6.96
Coleopleurus floridanus	0	0.67	3.13	1.31	6.57	13.53
Parazonanthidae	0.89	0.44	2.46	1.02	5.16	18.69
Distichopathes filix	0.72	0.56	2.2	0.91	4.63	23.32
Orange-red encrusting sponge	0.94	0.56	2.2	0.87	4.61	27.93
Placogorgia spp.	0.67	0.56	2.17	0.93	4.56	32.49
Creamy-white encrusting sponge	0.56	0.11	2.14	1.05	4.5	37
Nicella sp.	0.44	0.33	1.96	0.94	4.12	41.12
Madracis myriaster	0.89	0.67	1.84	0.74	3.86	44.98
Hypnogorgia sp.	0.94	0.67	1.79	0.71	3.75	48.73
Dark green encruster	0.39	0.11	1.67	0.81	3.5	52.23
Antipathes atlantica	0.33	0.22	1.66	0.8	3.49	55.72
Yellow encrusting sponge	0.78	0.78	1.6	0.69	3.36	59.08
Asteroidea sp. 4	0.33	0.11	1.55	0.73	3.25	62.33
Ophiuroidea	0.67	1	1.53	0.68	3.21	65.54
Asteroidea sp. 1	0	0.33	1.45	0.68	3.06	68.6
Asteroidea sp. 2	0.33	0	1.38	0.67	2.91	71.5
Groups 250m & 300m
Average dissimilarity = 43.61
	Group 250	Group 300
Species	Av.Abund	Av.Abund	Av.Diss	Diss/SD	Contrib%	Cum.%
Coleopleurus floridanus	0.27	0.67	2.76	1.09	6.34	6.34
Creamy-white encrusting sponge	0.64	0.11	2.62	1.2	6.01	12.35
Distichopathes filix	1	0.56	2.39	0.87	5.49	17.84
Parazonanthidae	0.64	0.44	2.38	0.97	5.45	23.29
Orange-red encrusting sponge	1	0.56	2.32	0.87	5.31	28.6
Placogorgia spp.	0.64	0.56	2.27	0.94	5.21	33.81
Crustose coralline algae	0.45	0.11	2.11	0.89	4.84	38.65
Nicella sp.	0.45	0.33	2.08	0.95	4.77	43.42
Madracis myriaster	0.91	0.67	1.91	0.73	4.38	47.8
Ophiuroidea	0.64	1	1.84	0.72	4.21	52
Hypnogorgia sp.	1	0.67	1.82	0.69	4.18	56.18
Antipathes atlantica	0.27	0.22	1.63	0.75	3.75	59.93
Yellow encrusting sponge	0.82	0.78	1.55	0.66	3.55	63.48
Asteroidea sp. 1	0	0.33	1.52	0.68	3.49	66.97
Madrepora oculata	0.27	0.11	1.46	0.67	3.35	70.31

## Sheet: Sheet2
SIMPER (Similarity Percentages - species contributions)
Data type: Abundance
Factor: Depth
Resemblance: Bray-Curtis similarity
Cut off for low contributions: 70.00%
Group 15m
Average similarity: 71.08
Species	Av.Abund	Av.Sim	Sim/SD	Contrib%	Cum.%
Pseudodiploria strigosa	48.03	26.71	3.41	37.57	37.57
Diploria labyrinthiformis	19.6	11.39	4.96	16.03	53.6
Orbicella franksi	13.75	7.74	4.4	10.9	64.5
Montastraea cavernosa	14.06	7.5	4.25	10.55	75.05
Group 30m
Average similarity: 62.65
Species	Av.Abund	Av.Sim	Sim/SD	Contrib%	Cum.%
Montastraea cavernosa	15.28	16.75	3.2	26.74	26.74
Orbicella franksi	12.3	12.94	2.99	20.65	47.39
Porites astreoides	6.66	7.64	2.01	12.2	59.59
Pseudodiploria strigosa	6.73	6.78	2.28	10.82	70.41
Group 60m
Average similarity: 8.84
Species	Av.Abund	Av.Sim	Sim/SD	Contrib%	Cum.%
Montastraea cavernosa	0.18	3.43	0.28	38.82	38.82
Tanacetipathes tanacetum	0.86	3.13	0.3	35.43	74.25
Group 90m
Average similarity: 41.91
Species	Av.Abund	Av.Sim	Sim/SD	Contrib%	Cum.%
Antipathes atlantica	5.07	27.18	2.53	64.84	64.84
Ellisella atlantica/elongata	2.29	5.62	0.67	13.4	78.24
Group 150m
Average similarity: 56.88
Species	Av.Abund	Av.Sim	Sim/SD	Contrib%	Cum.%
Stichopathes spp.	1.47	38.86	4.11	68.32	68.32
Tanacetipathes tanacetum	0.64	11.42	1.36	20.08	88.4
Group 200m
Average similarity: 60.76
Species	Av.Abund	Av.Sim	Sim/SD	Contrib%	Cum.%
Stichopathes spp.	4.17	50.2	2.43	82.62	82.62
Group 250m
Average similarity: 73.40
Species	Av.Abund	Av.Sim	Sim/SD	Contrib%	Cum.%
Stichopathes spp.	6.55	64.72	5.53	88.18	88.18
Group 300m
Average similarity: 55.73
Species	Av.Abund	Av.Sim	Sim/SD	Contrib%	Cum.%
Stichopathes spp.	5.4	52.4	1.95	94.03	94.03
Groups 15m & 30m
Average dissimilarity = 54.22
	Group 15	Group 30
Species	Av.Abund	Av.Abund	Av.Diss	Diss/SD	Contrib%	Cum.%
Pseudodiploria strigosa	48.03	6.73	20.98	2.59	38.7	38.7
Diploria labyrinthiformis	19.6	2.38	8.7	3.26	16.04	54.75
Montastraea cavernosa	14.06	15.28	4.32	1.33	7.97	62.71
Porites astreoides	14.22	6.66	4.02	1.22	7.41	70.12
Groups 15m & 60m
Average dissimilarity = 99.47
	Group 15	Group 60
Species	Av.Abund	Av.Abund	Av.Diss	Diss/SD	Contrib%	Cum.%
Pseudodiploria strigosa	48.03	0	35.57	4.59	35.76	35.76
Diploria labyrinthiformis	19.6	0	14.57	7.52	14.64	50.4
Orbicella franksi	13.75	0	10.29	3.93	10.35	60.75
Porites astreoides	14.22	0	9.97	3.07	10.02	70.77
Groups 30m & 60m
Average dissimilarity = 99.19
	Group 30	Group 60
Species	Av.Abund	Av.Abund	Av.Diss	Diss/SD	Contrib%	Cum.%
Montastraea cavernosa	15.28	0.18	23.6	3.5	23.79	23.79
Orbicella franksi	12.3	0	18.62	4.26	18.77	42.56
Porites astreoides	6.66	0	11.62	1.61	11.71	54.27
Pseudodiploria strigosa	6.73	0	10.12	2.97	10.2	64.48
Antillogorgia spp.	6.03	0	8.82	2.44	8.89	73.37
Groups 15m & 90m
Average dissimilarity = 100.00
	Group 15	Group 90
Species	Av.Abund	Av.Abund	Av.Diss	Diss/SD	Contrib%	Cum.%
Pseudodiploria strigosa	48.03	0	32.67	4.36	32.67	32.67
Diploria labyrinthiformis	19.6	0	13.36	6.84	13.36	46.03
Orbicella franksi	13.75	0	9.43	3.86	9.43	55.46
Montastraea cavernosa	14.06	0	9.26	3.87	9.26	64.72
Porites astreoides	14.22	0	9.18	2.9	9.18	73.9
Groups 30m & 90m
Average dissimilarity = 100.00
	Group 30	Group 90
Species	Av.Abund	Av.Abund	Av.Diss	Diss/SD	Contrib%	Cum.%
Montastraea cavernosa	15.28	0	20.05	3.37	20.05	20.05
Orbicella franksi	12.3	0	15.75	3.48	15.75	35.8
Porites astreoides	6.66	0	9.63	1.65	9.63	45.42
Pseudodiploria strigosa	6.73	0	8.59	2.65	8.59	54.02
Antillogorgia spp.	6.03	0	7.48	2.25	7.48	61.5
Antipathes atlantica	0	5.07	7.42	1.73	7.42	68.92
Agaricia fragilis	3.13	0	4.62	1.4	4.62	73.53
Groups 60m & 90m
Average dissimilarity = 94.45
	Group 60	Group 90
Species	Av.Abund	Av.Abund	Av.Diss	Diss/SD	Contrib%	Cum.%
Antipathes atlantica	0.11	5.07	35.63	3.01	37.73	37.73
Ellisella atlantica/elongata	0	2.29	13.5	1.03	14.3	52.02
Tanacetipathes tanacetum	0.86	1.11	10.66	0.82	11.28	63.31
Leptogorgia sp.	0	0.73	6.77	0.78	7.17	70.48
Groups 15m & 150m
Average dissimilarity = 100.00
	Group 15	Group 150
Species	Av.Abund	Av.Abund	Av.Diss	Diss/SD	Contrib%	Cum.%
Pseudodiploria strigosa	48.03	0	35.14	4.58	35.14	35.14
Diploria labyrinthiformis	19.6	0	14.38	7.52	14.38	49.52
Orbicella franksi	13.75	0	10.16	3.94	10.16	59.68
Montastraea cavernosa	14.06	0	9.96	4.12	9.96	69.64
Porites astreoides	14.22	0	9.85	3.05	9.85	79.49
Groups 30m & 150m
Average dissimilarity = 100.00
	Group 30	Group 150
Species	Av.Abund	Av.Abund	Av.Diss	Diss/SD	Contrib%	Cum.%
Montastraea cavernosa	15.28	0	23.26	3.6	23.26	23.26
Orbicella franksi	12.3	0	18.13	4.16	18.13	41.39
Porites astreoides	6.66	0	11.27	1.63	11.27	52.67
Pseudodiploria strigosa	6.73	0	9.87	2.93	9.87	62.54
Antillogorgia spp.	6.03	0	8.6	2.42	8.6	71.13
Groups 60m & 150m
Average dissimilarity = 89.57
	Group 60	Group 150
Species	Av.Abund	Av.Abund	Av.Diss	Diss/SD	Contrib%	Cum.%
Stichopathes spp.	0.05	1.47	35.9	2.34	40.08	40.08
Tanacetipathes tanacetum	0.86	0.64	20.75	1.41	23.17	63.25
Antipathes atlantica	0.11	0.27	6.02	1.21	6.72	69.96
Placogorgia spp.	0	0.19	4.78	0.49	5.33	75.3
Groups 90m & 150m
Average dissimilarity = 84.67
	Group 90	Group 150
Species	Av.Abund	Av.Abund	Av.Diss	Diss/SD	Contrib%	Cum.%
Antipathes atlantica	5.07	0.27	30.09	2.79	35.54	35.54
Ellisella atlantica/elongata	2.29	0.1	12.13	1.05	14.32	49.86
Stichopathes spp.	0.59	1.47	8.85	1.24	10.46	60.32
Tanacetipathes tanacetum	1.11	0.64	7.39	0.88	8.73	69.05
Leptogorgia sp.	0.73	0	5.77	0.78	6.82	75.86
Groups 15m & 200m
Average dissimilarity = 100.00
	Group 15	Group 200
Species	Av.Abund	Av.Abund	Av.Diss	Diss/SD	Contrib%	Cum.%
Pseudodiploria strigosa	48.03	0	34.47	4.55	34.47	34.47
Diploria labyrinthiformis	19.6	0	14.11	7.44	14.11	48.58
Orbicella franksi	13.75	0	9.96	3.94	9.96	58.54
Montastraea cavernosa	14.06	0	9.77	4.08	9.77	68.31
Porites astreoides	14.22	0	9.67	3.02	9.67	77.97
Groups 30m & 200m
Average dissimilarity = 100.00
	Group 30	Group 200
Species	Av.Abund	Av.Abund	Av.Diss	Diss/SD	Contrib%	Cum.%
Montastraea cavernosa	15.28	0	22.31	3.6	22.31	22.31
Orbicella franksi	12.3	0	17.43	3.97	17.43	39.75
Porites astreoides	6.66	0	10.79	1.64	10.79	50.54
Pseudodiploria strigosa	6.73	0	9.5	2.86	9.5	60.03
Antillogorgia spp.	6.03	0	8.27	2.38	8.27	68.3
Stichopathes spp.	0	4.17	7.09	1.51	7.09	75.39
Groups 60m & 200m
Average dissimilarity = 98.55
	Group 60	Group 200
Species	Av.Abund	Av.Abund	Av.Diss	Diss/SD	Contrib%	Cum.%
Stichopathes spp.	0.05	4.17	58.5	2.7	59.36	59.36
Tanacetipathes tanacetum	0.86	0.01	9.69	0.62	9.84	69.2
Hypnogorgia sp.	0	0.37	6.59	1.23	6.68	75.89
Groups 90m & 200m
Average dissimilarity = 93.27
	Group 90	Group 200
Species	Av.Abund	Av.Abund	Av.Diss	Diss/SD	Contrib%	Cum.%
Antipathes atlantica	5.07	0.01	27.45	2.96	29.43	29.43
Stichopathes spp.	0.59	4.17	22.28	1.48	23.88	53.31
Ellisella atlantica/elongata	2.29	0.01	10.81	1.03	11.59	64.9
Tanacetipathes tanacetum	1.11	0.01	6	0.72	6.43	71.33
Groups 150m & 200m
Average dissimilarity = 62.08
	Group 150	Group 200
Species	Av.Abund	Av.Abund	Av.Diss	Diss/SD	Contrib%	Cum.%
Stichopathes spp.	1.47	4.17	31.55	1.62	50.81	50.81
Tanacetipathes tanacetum	0.64	0.01	7.55	1.47	12.17	62.98
Hypnogorgia sp.	0	0.37	4.96	1.33	7.99	70.97
Groups 15m & 250m
Average dissimilarity = 100.00
	Group 15	Group 250
Species	Av.Abund	Av.Abund	Av.Diss	Diss/SD	Contrib%	Cum.%
Pseudodiploria strigosa	48.03	0	33.8	4.51	33.8	33.8
Diploria labyrinthiformis	19.6	0	13.83	7.37	13.83	47.62
Orbicella franksi	13.75	0	9.76	3.94	9.76	57.38
Montastraea cavernosa	14.06	0	9.58	4.02	9.58	66.96
Porites astreoides	14.22	0	9.48	2.98	9.48	76.44
Groups 30m & 250m
Average dissimilarity = 100.00
	Group 30	Group 250
Species	Av.Abund	Av.Abund	Av.Diss	Diss/SD	Contrib%	Cum.%
Montastraea cavernosa	15.28	0	21.39	3.59	21.39	21.39
Orbicella franksi	12.3	0	16.75	3.82	16.75	38.14
Stichopathes spp.	0	6.55	10.69	2	10.69	48.83
Porites astreoides	6.66	0	10.31	1.65	10.31	59.14
Pseudodiploria strigosa	6.73	0	9.13	2.8	9.13	68.28
Antillogorgia spp.	6.03	0	7.95	2.35	7.95	76.23
Groups 60m & 250m
Average dissimilarity = 99.04
	Group 60	Group 250
Species	Av.Abund	Av.Abund	Av.Diss	Diss/SD	Contrib%	Cum.%
Stichopathes spp.	0.05	6.55	69.19	4.87	69.86	69.86
Tanacetipathes tanacetum	0.86	0	7.4	0.6	7.47	77.33
Groups 90m & 250m
Average dissimilarity = 93.94
	Group 90	Group 250
Species	Av.Abund	Av.Abund	Av.Diss	Diss/SD	Contrib%	Cum.%
Stichopathes spp.	0.59	6.55	31.71	2.18	33.76	33.76
Antipathes atlantica	5.07	0.01	23.78	2.86	25.31	59.07
Ellisella atlantica/elongata	2.29	0.02	9.55	1.03	10.16	69.23
Tanacetipathes tanacetum	1.11	0	5.19	0.75	5.53	74.76
Groups 150m & 250m
Average dissimilarity = 70.73
	Group 150	Group 250
Species	Av.Abund	Av.Abund	Av.Diss	Diss/SD	Contrib%	Cum.%
Stichopathes spp.	1.47	6.55	45.44	2.96	64.25	64.25
Tanacetipathes tanacetum	0.64	0	5.82	1.48	8.23	72.48
Groups 200m & 250m
Average dissimilarity = 36.40
	Group 200	Group 250
Species	Av.Abund	Av.Abund	Av.Diss	Diss/SD	Contrib%	Cum.%
Stichopathes spp.	4.17	6.55	24.78	1.43	68.07	68.07
Placogorgia spp.	0.32	0.16	2.72	0.86	7.49	75.56
Groups 15m & 300m
Average dissimilarity = 100.00
	Group 15	Group 300
Species	Av.Abund	Av.Abund	Av.Diss	Diss/SD	Contrib%	Cum.%
Pseudodiploria strigosa	48.03	0	34.2	4.49	34.2	34.2
Diploria labyrinthiformis	19.6	0	13.99	7.27	13.99	48.2
Orbicella franksi	13.75	0	9.88	3.91	9.88	58.08
Montastraea cavernosa	14.06	0	9.69	4.03	9.69	67.77
Porites astreoides	14.22	0	9.59	2.99	9.59	77.37
Groups 30m & 300m
Average dissimilarity = 100.00
	Group 30	Group 300
Species	Av.Abund	Av.Abund	Av.Diss	Diss/SD	Contrib%	Cum.%
Montastraea cavernosa	15.28	0	21.98	3.52	21.98	21.98
Orbicella franksi	12.3	0	17.18	3.85	17.18	39.16
Porites astreoides	6.66	0	10.61	1.63	10.61	49.77
Pseudodiploria strigosa	6.73	0	9.36	2.81	9.36	59.14
Stichopathes spp.	0	5.4	8.88	1.56	8.88	68.02
Antillogorgia spp.	6.03	0	8.15	2.35	8.15	76.17
Groups 60m & 300m
Average dissimilarity = 98.59
	Group 60	Group 300
Species	Av.Abund	Av.Abund	Av.Diss	Diss/SD	Contrib%	Cum.%
Stichopathes spp.	0.05	5.4	65.95	3.15	66.89	66.89
Tanacetipathes tanacetum	0.86	0.05	9.75	0.58	9.89	76.78
Groups 90m & 300m
Average dissimilarity = 94.03
	Group 90	Group 300
Species	Av.Abund	Av.Abund	Av.Diss	Diss/SD	Contrib%	Cum.%
Stichopathes spp.	0.59	5.4	27.25	1.72	28.98	28.98
Antipathes atlantica	5.07	0.01	26.7	2.56	28.39	57.38
Ellisella atlantica/elongata	2.29	0	10.5	1	11.17	68.55
Tanacetipathes tanacetum	1.11	0.05	5.79	0.69	6.16	74.71
Groups 150m & 300m
Average dissimilarity = 68.17
	Group 150	Group 300
Species	Av.Abund	Av.Abund	Av.Diss	Diss/SD	Contrib%	Cum.%
Stichopathes spp.	1.47	5.4	42.23	2.67	61.95	61.95
Tanacetipathes tanacetum	0.64	0.05	7.62	1.17	11.17	73.12
Groups 200m & 300m
Average dissimilarity = 42.65
	Group 200	Group 300
Species	Av.Abund	Av.Abund	Av.Diss	Diss/SD	Contrib%	Cum.%
Stichopathes spp.	4.17	5.4	28.24	1.36	66.21	66.21
Distichopathes filix	0.17	0.4	3.23	1.04	7.57	73.78
Groups 250m & 300m
Average dissimilarity = 34.91
	Group 250	Group 300
Species	Av.Abund	Av.Abund	Av.Diss	Diss/SD	Contrib%	Cum.%
Stichopathes spp.	6.55	5.4	23.47	1.08	67.24	67.24
Hypnogorgia sp.	0.56	0.23	3.41	1.23	9.78	77.02

## Sheet: Sheet3
Two-way crossed SIMPER (Similarity Percentages - species contributions)
Data type: Presence-Absence
Factor: Depth x Site
Resemblance: Bray-Curtis similarity
Cut off for low contributions: 70.00%
Examines Depth groups						Examines Site groups
(across all Site groups)						(across all Depth groups)
Group 60m						Group SP
Average similarity: 69.31						Average similarity: 72.50
Species	Av.Abund	Av.Sim	Sim/SD	Contrib%	Cum.%	Species	Av.Abund	Av.Sim	Sim/SD	Contrib%	Cum.%
Sporochnus bolleanus	0.75	5.72	1.38	8.25	8.25	Yellow-green encrusting sponge	0.96	7.09	2.64	9.78	9.78
Crustose coralline algae	0.92	5.56	2.07	8.02	16.28	Orange-red encrusting sponge	0.81	5.54	1.52	7.64	17.41
Orange-red encrusting sponge	0.92	5.56	2.07	8.02	24.3	Stichopathes spp.	0.62	5.43	1.26	7.49	24.9
Yellow-green encrusting sponge	0.92	5.56	2.07	8.02	32.32	Crustose coralline algae	0.65	3.83	1.13	5.28	30.18
Lobophora canariensis	0.75	4.94	1.62	7.13	39.45	Parazonanthidae	0.46	3.64	0.81	5.02	35.2
Caulerpa mexicana	0.5	4.22	0.87	6.09	45.54	Antipathes atlantica	0.46	3.47	0.94	4.79	39.99
Caulerpa mexicana	0.5	4.22	0.87	6.09	51.62	Madracis myriaster	0.35	2.91	0.62	4.01	44
Dasya spp.	0.75	3.68	1.12	5.31	56.94	Hypnogorgia sp.	0.35	2.91	0.62	4.01	48.01
Caulerpa chemnitzia	0.75	3.3	0.95	4.76	61.7	Tanacetipathes tanacetum	0.31	2.52	0.72	3.48	51.49
Green filamentous algae	0.58	2.71	0.8	3.92	65.61	Creamy-white encrusting sponge	0.19	2.33	0.67	3.21	54.7
Dictyopteris spp. /Dictyota spp.	0.67	2.62	0.81	3.78	69.39	Yellow encrusting sponge	0.35	1.92	0.57	2.65	57.35
Red sieve encrusting sponge, cf. Phorbas amaranthus	0.5	2.2	0.67	3.18	72.57	Dark green encruster	0.23	1.76	0.53	2.43	59.78
						Sporochnus bolleanus	0.23	1.62	0.45	2.23	62.01
Group 30m						Dictyopteris spp. /Dictyota spp.	0.38	1.62	0.63	2.23	64.24
Average similarity: 86.70						Antipathes furcata	0.23	1.3	0.48	1.79	66.03
						Distichopathes filix	0.23	1.27	0.38	1.75	67.79
Species	Av.Abund	Av.Sim	Sim/SD	Contrib%	Cum.%	Caulerpa mexicana	0.12	1.03	0.31	1.42	69.21
Madracis spp.	1	4.58	12.73	5.28	5.28	Caulerpa mexicana	0.12	1.03	0.31	1.42	70.62
Orbicella franksi	1	4.58	12.73	5.28	10.56
Montastraea cavernosa	1	4.58	12.73	5.28	15.84	Group NNE
Pseudodiploria strigosa	1	4.58	12.73	5.28	21.13	Average similarity: 79.65
Porites astreoides	1	4.58	12.73	5.28	26.41
Antillogorgia spp.	1	4.58	12.73	5.28	31.69	Species	Av.Abund	Av.Sim	Sim/SD	Contrib%	Cum.%
Dictyopteris spp. /Dictyota spp.	1	4.58	12.73	5.28	36.97	Yellow-green encrusting sponge	1	5.64	6.1	7.08	7.08
Lobophora canariensis	1	4.58	12.73	5.28	42.25	Orange-red encrusting sponge	0.92	5.15	2.57	6.47	13.55
Brown fleshy crust	1	4.58	12.73	5.28	47.53	Crustose coralline algae	0.83	4.19	1.79	5.26	18.81
Crustose coralline algae	1	4.58	12.73	5.28	52.81	Madracis myriaster	0.5	3.53	1.12	4.43	23.24
Aplysina fistularis	1	4.58	12.73	5.28	58.1	Stichopathes spp.	0.54	3.53	1.12	4.43	27.67
Orange-red encrusting sponge	1	4.58	12.73	5.28	63.38	Distichopathes filix	0.46	3.53	1.12	4.43	32.09
Yellow-green encrusting sponge	1	4.58	12.73	5.28	68.66	Nicella sp.	0.46	3.53	1.12	4.43	36.52
Millepora alcicornis	1	4.58	12.73	5.28	73.94	Hypnogorgia sp.	0.46	3.53	1.12	4.43	40.95
						Placogorgia spp.	0.46	3.53	1.12	4.43	45.38
Group 15m						Creamy-white encrusting sponge	0.38	2.8	0.91	3.51	48.89
Average similarity: 87.09						Yellow encrusting sponge	0.46	2.65	0.84	3.33	52.22
						Ophiuroidea	0.38	2.07	0.67	2.59	54.82
Species	Av.Abund	Av.Sim	Sim/SD	Contrib%	Cum.%	Parazonanthidae	0.38	1.98	0.67	2.48	57.3
Orbicella franksi	1	4.66	8.12	5.35	5.35	Lobophora canariensis	0.46	1.78	0.71	2.23	59.53
Montastraea cavernosa	1	4.66	8.12	5.35	10.69	Dictyopteris spp. /Dictyota spp.	0.46	1.66	0.72	2.09	61.62
Diploria labyrinthiformis	1	4.66	8.12	5.35	16.04	Callogorgia spp.	0.21	1.21	0.51	1.52	63.14
Pseudodiploria strigosa	1	4.66	8.12	5.35	21.39	Codium sp.	0.25	1.12	0.5	1.41	64.55
Porites astreoides	1	4.66	8.12	5.35	26.73	Dasya spp.	0.25	1.12	0.5	1.41	65.95
Antillogorgia spp.	1	4.66	8.12	5.35	32.08	Verdigellas peltata	0.25	1.12	0.5	1.41	67.36
Eunicea spp.	1	4.66	8.12	5.35	37.43	Sporochnus bolleanus	0.25	1.12	0.5	1.41	68.77
Plexaurella spp.	1	4.66	8.12	5.35	42.77	Orbicella franksi	0.25	0.99	0.51	1.24	70.01
Pseudoplexaura spp.	1	4.66	8.12	5.35	48.12
Dictyopteris spp. /Dictyota spp.	1	4.66	8.12	5.35	53.46	Group PL
Brown fleshy crust	1	4.66	8.12	5.35	58.81	Average similarity: 67.76
Aplysina fistularis	1	4.66	8.12	5.35	64.16
Yellow-green encrusting sponge	1	4.66	8.12	5.35	69.5	Species	Av.Abund	Av.Sim	Sim/SD	Contrib%	Cum.%
Crustose coralline algae	0.9	3.74	2.08	4.3	73.8	Stichopathes spp.	0.72	7.69	1.46	11.35	11.35
						Ophiuroidea	0.56	6.5	1.08	9.6	20.95
Group 90m						Orange-red encrusting sponge	0.89	6.39	2.11	9.42	30.37
Average similarity: 75.78						Yellow-green encrusting sponge	0.89	6.39	2.11	9.42	39.8
						Crustose coralline algae	0.78	5.6	1.56	8.27	48.07
Species	Av.Abund	Av.Sim	Sim/SD	Contrib%	Cum.%	Distichopathes filix	0.44	3.86	0.91	5.7	53.76
Antipathes atlantica	1	5.42	4.99	7.15	7.15	Coleopleurus floridanus	0.33	3.83	0.6	5.66	59.42
Dictyopteris spp. /Dictyota spp.	1	5.42	4.99	7.15	14.31	Yellow encrusting sponge	0.44	3.42	0.54	5.05	64.47
Crustose coralline algae	1	5.42	4.99	7.15	21.46	Parazonanthidae	0.39	3.05	0.73	4.5	68.97
Orange-red encrusting sponge	1	5.42	4.99	7.15	28.61	Hypnogorgia sp.	0.39	2.41	0.66	3.56	72.53
Yellow-green encrusting sponge	1	5.42	4.99	7.15	35.77
Sporochnus bolleanus	0.91	4.68	2.54	6.18	41.94	Group TIG
Ellisella atlantica/elongata	0.73	3.82	1.41	5.04	46.98	Average similarity: 75.67
Hydroid sp. 1	0.73	3.6	1.38	4.75	51.73
Cladophora sp.	0.82	3.16	1.09	4.17	55.9	Species	Av.Abund	Av.Sim	Sim/SD	Contrib%	Cum.%
Tanacetipathes tanacetum	0.73	2.57	0.93	3.39	59.3	Yellow-green encrusting sponge	1	6.06	3.5	8.01	8.01
Membranous red blades	0.64	2.37	0.92	3.12	62.42	Crustose coralline algae	0.91	4.59	1.83	6.07	14.08
Galaxaura sp.	0.55	2.24	0.76	2.95	65.37	Orange-red encrusting sponge	0.83	4.08	1.32	5.39	19.47
Stichopathes spp.	0.55	2.19	0.77	2.89	68.26	Stichopathes spp.	0.57	3.89	1.06	5.14	24.61
Leptogorgia sp.	0.55	2	0.73	2.64	70.9	Madracis myriaster	0.39	3.42	0.9	4.52	29.13
						Hypnogorgia sp.	0.35	3.42	0.9	4.52	33.66
Group 150m						Yellow encrusting sponge	0.39	3.42	0.9	4.52	38.18
Average similarity: 71.10						Placogorgia spp.	0.35	2.29	0.66	3.03	41.21
						Dictyopteris spp. /Dictyota spp.	0.57	2.19	0.91	2.89	44.1
Species	Av.Abund	Av.Sim	Sim/SD	Contrib%	Cum.%	Parazonanthidae	0.3	1.95	0.63	2.58	46.68
Antipathes atlantica	0.9	7.28	10.56	10.24	10.24	Tanacetipathes tanacetum	0.43	1.63	0.58	2.16	48.84
Stichopathes spp.	1	7.28	10.56	10.24	20.49	Agaricia fragilis	0.35	1.51	0.73	2	50.84
Tanacetipathes tanacetum	1	7.28	10.56	10.24	30.73	Orbicella franksi	0.35	1.51	0.73	2	52.83
Crustose coralline algae	1	7.28	10.56	10.24	40.98	Montastraea cavernosa	0.39	1.51	0.73	2	54.83
Orange-red encrusting sponge	1	7.28	10.56	10.24	51.22	Diploria labyrinthiformis	0.35	1.51	0.73	2	56.83
Yellow-green encrusting sponge	1	7.28	10.56	10.24	61.47	Pseudodiploria strigosa	0.35	1.51	0.73	2	58.83
Creamy-white encrusting sponge	0.6	5.55	1.72	7.81	69.27	Porites astreoides	0.35	1.51	0.73	2	60.82
Dark green encruster	0.8	4.13	1.03	5.81	75.08	Stephanocoeania intersepta/Siderastrea radians	0.35	1.51	0.73	2	62.82
						Antillogorgia spp.	0.35	1.51	0.73	2	64.82
Group 200m						Brown fleshy crust	0.39	1.51	0.73	2	66.81
Average similarity: 69.93						Aplysina fistularis	0.35	1.51	0.73	2	68.81
						Millepora alcicornis	0.35	1.51	0.73	2	70.81
Species	Av.Abund	Av.Sim	Sim/SD	Contrib%	Cum.%
Stichopathes spp.	1	7.23	4.6	10.34	10.34	Groups SP & NNE
Yellow-green encrusting sponge	1	7.23	4.6	10.34	20.68	Average dissimilarity = 33.32
Hypnogorgia sp.	0.94	6.42	2.59	9.18	29.86
Orange-red encrusting sponge	0.94	6	2.07	8.57	38.43		Group SP	Group NNE
Madracis myriaster	0.89	5.95	2.07	8.51	46.94	Species	Av.Abund	Av.Abund	Av.Diss	Diss/SD	Contrib%
Parazonanthidae	0.89	5.32	1.52	7.61	54.56	Nicella sp.	0.12	0.46	1.89	0.96	5.66
Crustose coralline algae	0.83	5.16	1.65	7.38	61.94	Creamy-white encrusting sponge	0.19	0.38	1.66	0.86	4.97
Yellow encrusting sponge	0.78	4.64	1.35	6.63	68.57	Antipathes atlantica	0.46	0.29	1.31	0.7	3.93
Distichopathes filix	0.72	4.41	1.26	6.3	74.87	Crustose coralline algae	0.65	0.83	1.15	0.65	3.46
						Placogorgia spp.	0.27	0.46	1.12	0.6	3.36
Group 250m						Asteroidea sp. 2	0.04	0.25	1	0.58	3
Average similarity: 73.90						Distichopathes filix	0.23	0.46	0.97	0.58	2.9
						Lobophora canariensis	0.15	0.46	0.96	0.63	2.89
Species	Av.Abund	Av.Sim	Sim/SD	Contrib%	Cum.%	Yellow encrusting sponge	0.35	0.46	0.89	0.52	2.67
Stichopathes spp.	1	8.09	5.05	10.95	10.95	Codium sp.	0	0.25	0.79	0.53	2.38
Distichopathes filix	1	8.09	5.05	10.95	21.91	Ophiuroidea	0.19	0.38	0.74	0.48	2.21
Hypnogorgia sp.	1	8.09	5.05	10.95	32.86	Callogorgia spp.	0	0.21	0.73	0.5	2.19
Orange-red encrusting sponge	1	8.09	5.05	10.95	43.81	Dark green encruster	0.23	0.25	0.72	0.48	2.17
Yellow-green encrusting sponge	1	8.09	5.05	10.95	54.76	Asteroidea sp. 4	0.04	0.21	0.71	0.48	2.12
Madracis myriaster	0.91	6.52	1.72	8.83	63.59	Orange-red encrusting sponge	0.81	0.92	0.7	0.44	2.1
Yellow encrusting sponge	0.82	4.44	1.15	6.01	69.6	Parazonanthidae	0.46	0.38	0.7	0.46	2.1
Ophiuroidea	0.64	4.26	1.15	5.77	75.37	Chironephthya	0.08	0.08	0.61	0.43	1.82
						Udotea cyanthiformis	0	0.17	0.58	0.41	1.75
Group 300m						Caryophyllidae	0.12	0.08	0.56	0.41	1.69
Average similarity: 69.11						Verdigellas peltata	0.08	0.25	0.56	0.41	1.68
						Tanacetipathes hirta	0.08	0.17	0.54	0.42	1.62
Species	Av.Abund	Av.Sim	Sim/SD	Contrib%	Cum.%	Tanacetipathes tanacetum	0.31	0.17	0.54	0.43	1.61
Stichopathes spp.	1	11.34	2.55	16.41	16.41	Antipathes furcata	0.23	0.08	0.52	0.43	1.57
Ophiuroidea	1	11.34	2.55	16.41	32.83	Chladophoropsis macromeres	0.04	0.17	0.5	0.44	1.5
Yellow encrusting sponge	0.78	7.86	1.07	11.37	44.2	Green filamentous algae	0.19	0.04	0.49	0.43	1.48
Coleopleurus floridanus	0.67	6.89	0.83	9.97	54.16	Red sieve encrusting sponge, cf. Phorbas amaranthus	0	0.13	0.49	0.36	1.47
Madracis myriaster	0.67	5.76	1.24	8.34	62.5	Purple encruster	0	0.13	0.47	0.37	1.42
Hypnogorgia sp.	0.67	5.76	1.24	8.34	70.84	Peyssonnelia spp.	0.08	0.17	0.47	0.42	1.41
						Copidaster schismochilus	0	0.13	0.44	0.37	1.33
Groups 60m & 30m						Caulerpa chemnitzia	0.08	0.21	0.41	0.34	1.22
Average dissimilarity = 74.47						Plexaura homomalla	0.08	0.08	0.39	0.44	1.18
	Group 60	Group 30				Groups SP & PL
Species	Av.Abund	Av.Abund	Av.Diss	Diss/SD	Contrib%	Average dissimilarity = 42.95
Madracis spp.	0	1	2.94	5.55	3.95
Orbicella franksi	0	1	2.94	5.55	3.95		Group SP	Group PL
Pseudodiploria strigosa	0	1	2.94	5.55	3.95	Species	Av.Abund	Av.Abund	Av.Diss	Diss/SD	Contrib%
Porites astreoides	0	1	2.94	5.55	3.95	Madracis myriaster	0.35	0.33	2.04	0.76	4.75
Antillogorgia spp.	0	1	2.94	5.55	3.95	Yellow encrusting sponge	0.35	0.44	1.98	0.79	4.62
Aplysina fistularis	0	1	2.94	5.55	3.95	Distichopathes filix	0.23	0.44	1.86	0.78	4.32
Millepora alcicornis	0	1	2.94	5.55	3.95	Placogorgia spp.	0.27	0.17	1.73	0.78	4.03
Stephanocoeania intersepta/Siderastrea radians	0	0.9	2.66	2.55	3.57	Parazonanthidae	0.46	0.39	1.73	0.66	4.03
Montastraea cavernosa	0.25	1	2.58	2.24	3.46	Hypnogorgia sp.	0.35	0.39	1.52	0.59	3.55
Agaricia fragilis	0	0.9	2.57	2.69	3.45	Ellisella atlantica/elongata	0.19	0.28	1.48	0.77	3.44
Diploria labyrinthiformis	0	0.9	2.57	2.69	3.45	Copidaster schismochilus	0	0.28	1.37	0.6	3.18
Brown fleshy crust	0.17	1	2.56	2.23	3.44	Creamy-white encrusting sponge	0.19	0.22	1.2	0.67	2.79
Caulerpa chemnitzia	0.75	0	2.14	1.76	2.88	Crustose coralline algae	0.65	0.78	1.19	0.59	2.76
Meandrina meandrites	0	0.7	2.02	1.42	2.72	Dark green encruster	0.23	0.22	1.09	0.59	2.53
Scolymia cubensis	0	0.7	2.02	1.44	2.71	Ophiuroidea	0.19	0.56	1.09	0.54	2.53
Caulerpa mexicana	0.5	0	1.84	1.15	2.47	Asteroidea sp. 2	0.04	0.22	1.07	0.56	2.5
Caulerpa mexicana	0.5	0	1.84	1.15	2.47	Viminella sp.	0.15	0.11	0.99	0.53	2.3
Sporochnus bolleanus	0.75	0	1.84	1.15	2.47	Antipathes atlantica	0.46	0.28	0.97	0.54	2.25
Aplysina cauliformis	0	0.6	1.79	1.15	2.4	Coleopleurus floridanus	0.08	0.33	0.93	0.49	2.17
Dasya spp.	0.75	0	1.78	1.28	2.4	Yellow-green encrusting sponge	0.96	0.89	0.93	0.41	2.16
Eunicea spp.	0.17	0.5	1.6	1.1	2.15	Lobophora canariensis	0.15	0.22	0.74	0.48	1.72
Verdigellas peltata	0.58	0.1	1.54	1.12	2.07	Caryophyllidae	0.12	0.06	0.73	0.46	1.71
Red sieve encrusting sponge, cf. Phorbas amaranthus	0.5	0	1.54	1.12	2.07	Nicella sp.	0.12	0.11	0.7	0.47	1.62
						White fluffy sponge	0.12	0	0.69	0.41	1.61
Groups 60m & 15m						Hydroid sp. 1	0.19	0	0.67	0.49	1.57
Average dissimilarity = 81.04						Tanacetipathes hirta	0.08	0.11	0.67	0.47	1.55
						Madrepora oculata	0.08	0.06	0.67	0.41	1.55
	Group 60	Group 15				Orange-red encrusting sponge	0.81	0.89	0.66	0.36	1.54
Species	Av.Abund	Av.Abund	Av.Diss	Diss/SD	Contrib%	Isostichopus badionotus	0.08	0.11	0.65	0.44	1.51
Orbicella franksi	0	1	2.99	4.6	3.69	Asteroidea sp. 1	0.08	0.06	0.61	0.34	1.43
Diploria labyrinthiformis	0	1	2.99	4.6	3.69	Asteroidea sp. 4	0.04	0.11	0.59	0.38	1.37
Pseudodiploria strigosa	0	1	2.99	4.6	3.69
Porites astreoides	0	1	2.99	4.6	3.69	Groups NNE & PL
Antillogorgia spp.	0	1	2.99	4.6	3.69	Average dissimilarity = 40.93
Plexaurella spp.	0	1	2.99	4.6	3.69
Pseudoplexaura spp.	0	1	2.99	4.6	3.69		Group NNE	Group PL
Aplysina fistularis	0	1	2.99	4.6	3.69	Species	Av.Abund	Av.Abund	Av.Diss	Diss/SD	Contrib%
Montastraea cavernosa	0.25	1	2.64	2.14	3.25	Nicella sp.	0.46	0.11	2.47	1.28	6.03
Brown fleshy crust	0.17	1	2.62	2.13	3.23	Placogorgia spp.	0.46	0.17	2.23	1.15	5.46
Palythoa caribaeorum	0	0.9	2.61	2.55	3.22	Madracis myriaster	0.5	0.33	1.84	0.89	4.51
Eunicea spp.	0.17	1	2.4	1.75	2.96	Creamy-white encrusting sponge	0.38	0.22	1.49	0.79	3.65
Millepora alcicornis	0	0.8	2.25	1.85	2.78	Dark green encruster	0.25	0.22	1.28	0.7	3.13
Caulerpa chemnitzia	0.75	0	2.16	1.75	2.66	Antipathes atlantica	0.29	0.28	1.25	0.64	3.04
Agaricia fragilis	0	0.7	1.98	1.45	2.44	Copidaster schismochilus	0.13	0.28	1.23	0.67	3
Orange-red encrusting sponge	0.92	0.3	1.95	1.33	2.4	Hypnogorgia sp.	0.46	0.39	1.19	0.59	2.91
Caulerpa mexicana	0.5	0	1.9	1.12	2.35	Asteroidea sp. 4	0.21	0.11	1.18	0.67	2.88
Caulerpa mexicana	0.5	0	1.9	1.12	2.35	Callogorgia spp.	0.21	0	1.15	0.71	2.81
Sporochnus bolleanus	0.75	0	1.9	1.12	2.35	Coleopleurus floridanus	0.04	0.33	1.11	0.59	2.7
Plexaura homomalla	0	0.6	1.82	1.15	2.24	Asteroidea sp. 2	0.25	0.22	1.07	0.65	2.62
Dasya spp.	0.75	0	1.8	1.28	2.23	Ellisella atlantica/elongata	0.08	0.28	0.99	0.64	2.43
Meandrina meandrites	0	0.6	1.68	1.17	2.07	Yellow encrusting sponge	0.46	0.44	0.98	0.6	2.39
Stephanocoeania intersepta/Siderastrea radians	0	0.6	1.6	1.2	1.98	Parazonanthidae	0.38	0.39	0.95	0.57	2.33
Aplysina cauliformis	0	0.6	1.6	1.2	1.98	Distichopathes filix	0.46	0.44	0.85	0.46	2.09
						Purple encruster	0.13	0.11	0.73	0.51	1.78
Groups 30m & 15m						Caryophyllidae	0.08	0.06	0.71	0.45	1.75
Average dissimilarity = 23.98						Codium sp.	0.25	0.06	0.65	0.52	1.6
						Green filamentous algae	0.04	0.22	0.63	0.52	1.54
	Group 30	Group 15				Isostichopus badionotus	0.04	0.11	0.63	0.43	1.53
Species	Av.Abund	Av.Abund	Av.Diss	Diss/SD	Contrib%	Antipathes furcata	0.08	0.22	0.6	0.45	1.46
Pseudoplexaura spp.	0	1	2.32	9.92	9.67	Crustose coralline algae	0.83	0.78	0.56	0.4	1.37
Orange-red encrusting sponge	1	0.3	1.64	1.51	6.83	Orange-red encrusting sponge	0.92	0.89	0.53	0.34	1.3
Scolymia cubensis	0.7	0	1.62	1.51	6.74	Yellow-green encrusting sponge	1	0.89	0.53	0.34	1.3
Plexaurella spp.	0.3	1	1.58	1.32	6.57	Chrysogorgia sp.	0.08	0	0.52	0.37	1.26
Aplysina cauliformis	0.6	0.6	1.45	1.23	6.05	Tanacetipathes hirta	0.17	0.11	0.51	0.42	1.25
Lobophora canariensis	1	0.4	1.44	1.23	6.02	Peyssonnelia spp.	0.17	0.06	0.51	0.46	1.24
Plexaura homomalla	0.4	0.6	1.37	1.17	5.73	Membranous red blades	0.21	0.11	0.51	0.46	1.24
Cerithium sp.	0.5	0.2	1.21	1.04	5.03
Eunicea spp.	0.5	1	1.14	0.92	4.77	Groups SP & TIG
Madracis spp.	1	0.5	1.12	0.92	4.66	Average dissimilarity = 33.60
Meandrina meandrites	0.7	0.6	1.11	0.92	4.63
Palythoa caribaeorum	0.5	0.9	1.06	0.87	4.41		Group SP	Group TIG
						Species	Av.Abund	Av.Abund	Av.Diss	Diss/SD	Contrib%
Groups 60m & 90m						Creamy-white encrusting sponge	0.19	0.26	1.32	0.67	3.92
Average dissimilarity = 52.42						Crustose coralline algae	0.65	0.91	1.2	0.6	3.56
						Tanacetipathes tanacetum	0.31	0.43	1.19	0.62	3.54
	Group 60	Group 90				Antipathes atlantica	0.46	0.39	1.16	0.58	3.45
Species	Av.Abund	Av.Abund	Av.Diss	Diss/SD	Contrib%	Distichopathes filix	0.23	0.3	0.92	0.52	2.73
Antipathes atlantica	0.17	1	2.66	1.8	5.07	Lobophora canariensis	0.15	0.39	0.87	0.52	2.59
Ellisella atlantica/elongata	0	0.73	2.38	1.45	4.54	Nicella sp.	0.12	0.17	0.86	0.51	2.55
Galaxaura sp.	0	0.55	1.8	0.99	3.44	Placogorgia spp.	0.27	0.35	0.82	0.46	2.45
Caulerpa mexicana	0.5	0	1.77	0.99	3.38	Light-green encrusting sponge	0	0.22	0.81	0.48	2.41
Caulerpa mexicana	0.5	0	1.77	0.99	3.38	Parazonanthidae	0.46	0.3	0.75	0.45	2.24
Caulerpa chemnitzia	0.75	0.27	1.75	1.07	3.34	Ophiuroidea	0.19	0.17	0.7	0.44	2.08
Membranous red blades	0.5	0.64	1.7	0.96	3.24	Dark green encruster	0.23	0.09	0.67	0.44	1.99
Cladophora sp.	0.5	0.82	1.69	1	3.22	Antipathes furcata	0.23	0.04	0.67	0.51	1.99
Leptogorgia sp.	0	0.55	1.67	1.01	3.18	Peyssonnelia spp.	0.08	0.13	0.66	0.46	1.96
Ellisella grandis	0	0.55	1.66	1.03	3.17	Orange-red encrusting sponge	0.81	0.83	0.65	0.39	1.93
Hydroid sp. 1	0.25	0.73	1.63	0.93	3.1	Aplysina cauliformis	0.08	0.22	0.64	0.6	1.9
Peyssonnelia spp.	0.33	0.36	1.57	0.97	3	Asteroidea sp. 4	0.04	0.09	0.62	0.4	1.83
Antipathes furcata	0	0.45	1.55	0.84	2.96	Yellow encrusting sponge	0.35	0.39	0.6	0.37	1.77
Tanacetipathes tanacetum	0.25	0.73	1.49	0.84	2.85	Caulerpa mexicana	0.12	0	0.58	0.36	1.71
Stichopathes spp.	0.08	0.55	1.48	0.85	2.83	Caulerpa mexicana	0.12	0	0.58	0.36	1.71
Green filamentous algae	0.58	0.55	1.48	0.79	2.83	Sporochnus bolleanus	0.23	0.13	0.58	0.36	1.71
Red sieve encrusting sponge, cf. Phorbas amaranthus	0.5	0	1.45	0.99	2.78	Cerithium sp.	0.04	0.26	0.57	0.45	1.69
Dasya spp.	0.75	0.45	1.42	0.77	2.71	Caryophyllidae	0.12	0.09	0.54	0.4	1.62
White-brown encrusting sponge	0.17	0.45	1.4	0.89	2.67	Dasya spp.	0.15	0.04	0.54	0.4	1.6
Tanacetipathes hirta	0	0.45	1.37	0.85	2.61	Green filamentous algae	0.19	0.13	0.52	0.38	1.56
Dictyopteris spp. /Dictyota spp.	0.67	1	1.32	0.7	2.51	Verdigellas peltata	0.08	0.13	0.49	0.4	1.47
Verdigellas peltata	0.58	0.55	1.15	0.68	2.19	Cladophora sp.	0.12	0.17	0.48	0.36	1.44
Sporochnus bolleanus	0.75	0.91	1.12	0.74	2.13	Viminella sp.	0.15	0.09	0.48	0.37	1.43
						Membranous red blades	0.15	0.09	0.48	0.4	1.43
Groups 30m & 90m						Chironephthya	0.08	0	0.44	0.35	1.3
Average dissimilarity = 78.09						Hydroid sp. 1	0.19	0.13	0.42	0.34	1.26
						Agaricia fragilis	0.12	0.35	0.41	0.45	1.23
	Group 30	Group 90				Stephanocoeania intersepta/Siderastrea radians	0.12	0.35	0.41	0.45	1.21
Species	Av.Abund	Av.Abund	Av.Diss	Diss/SD	Contrib%	Aspagaropsis taxiformis	0.12	0	0.41	0.45	1.21
Madracis spp.	1	0	2.45	9.02	3.13	Eunicea spp.	0.19	0.3	0.4	0.39	1.18
Orbicella franksi	1	0	2.45	9.02	3.13	Red sieve encrusting sponge, cf. Phorbas amaranthus	0	0.09	0.39	0.29	1.16
Montastraea cavernosa	1	0	2.45	9.02	3.13
Pseudodiploria strigosa	1	0	2.45	9.02	3.13	Groups NNE & TIG
Porites astreoides	1	0	2.45	9.02	3.13	Average dissimilarity = 29.00
Antipathes atlantica	0	1	2.45	9.02	3.13
Antillogorgia spp.	1	0	2.45	9.02	3.13		Group NNE	Group TIG
Sporochnus bolleanus	0	0.91	2.45	9.02	3.13	Species	Av.Abund	Av.Abund	Av.Diss	Diss/SD	Contrib%
Brown fleshy crust	1	0	2.45	9.02	3.13	Tanacetipathes tanacetum	0.17	0.43	1.04	0.71	3.58
Aplysina fistularis	1	0	2.45	9.02	3.13	Antipathes atlantica	0.29	0.39	1.02	0.65	3.5
Millepora alcicornis	1	0	2.45	9.02	3.13	Callogorgia spp.	0.21	0.04	0.95	0.63	3.29
Stephanocoeania intersepta/Siderastrea radians	0.9	0	2.22	2.79	2.84	Asteroidea sp. 2	0.25	0.04	0.95	0.61	3.26
Ellisella atlantica/elongata	0	0.73	2.21	2.78	2.84	Ophiuroidea	0.38	0.17	0.86	0.57	2.95
Agaricia fragilis	0.9	0	2.15	2.82	2.76	Asteroidea sp. 4	0.21	0.09	0.83	0.57	2.85
Diploria labyrinthiformis	0.9	0	2.15	2.82	2.76	Dark green encruster	0.25	0.09	0.8	0.55	2.74
Hydroid sp. 1	0	0.73	2.11	2.39	2.71	Nicella sp.	0.46	0.17	0.77	0.53	2.65
Tanacetipathes tanacetum	0	0.73	1.92	1.91	2.46	Parazonanthidae	0.38	0.3	0.68	0.49	2.33
Cladophora sp.	0	0.82	1.87	1.74	2.39	Codium sp.	0.25	0	0.66	0.53	2.27
Membranous red blades	0	0.64	1.84	1.74	2.35	Purple encruster	0.13	0.09	0.64	0.49	2.19
Stichopathes spp.	0	0.55	1.69	1.47	2.17	Cerithium sp.	0.04	0.26	0.62	0.56	2.13
Scolymia cubensis	0.7	0	1.69	1.48	2.17	Copidaster schismochilus	0.13	0	0.57	0.46	1.96
Meandrina meandrites	0.7	0	1.69	1.47	2.16	Peyssonnelia spp.	0.17	0.13	0.57	0.51	1.95
Ellisella grandis	0	0.55	1.66	1.47	2.13	Verdigellas peltata	0.25	0.13	0.53	0.47	1.81
Aplysina cauliformis	0.6	0	1.47	1.18	1.88	Dasya spp.	0.25	0.04	0.52	0.47	1.8
Lobophora canariensis	1	0.45	1.44	1.11	1.85	Plexaura homomalla	0.08	0.26	0.51	0.54	1.74
Verdigellas peltata	0.1	0.55	1.34	1.11	1.72	Udotea cyanthiformis	0.17	0	0.5	0.43	1.71
Tanacetipathes hirta	0	0.45	1.34	1.11	1.71	Distichopathes filix	0.46	0.3	0.48	0.4	1.67
						Creamy-white encrusting sponge	0.38	0.26	0.45	0.38	1.56
Groups 15m & 90m						Caryophyllidae	0.08	0.09	0.44	0.42	1.52
Average dissimilarity = 82.95						Light-green encrusting sponge	0.04	0.22	0.44	0.41	1.51
						Viminella sp.	0.04	0.09	0.44	0.39	1.51
	Group 15	Group 90				Ellisella atlantica/elongata	0.08	0.22	0.43	0.44	1.49
Species	Av.Abund	Av.Abund	Av.Diss	Diss/SD	Contrib%	Tanacetipathes hirta	0.17	0.09	0.43	0.39	1.47
Orbicella franksi	1	0	2.48	7.44	2.99	Antipathes furcata	0.08	0.04	0.42	0.41	1.45
Montastraea cavernosa	1	0	2.48	7.44	2.99	Chrysogorgia sp.	0.08	0.04	0.39	0.35	1.35
Diploria labyrinthiformis	1	0	2.48	7.44	2.99	Caulerpa mexicana	0.13	0	0.39	0.36	1.34
Pseudodiploria strigosa	1	0	2.48	7.44	2.99	Caulerpa mexicana	0.13	0	0.39	0.36	1.34
Porites astreoides	1	0	2.48	7.44	2.99	Sporochnus bolleanus	0.25	0.13	0.39	0.36	1.34
Antipathes atlantica	0	1	2.48	7.44	2.99	Crustose coralline algae	0.83	0.91	0.38	0.33	1.32
Antillogorgia spp.	1	0	2.48	7.44	2.99	Orange-red encrusting sponge	0.92	0.83	0.38	0.36	1.31
Eunicea spp.	1	0	2.48	7.44	2.99	Chladophoropsis macromeres	0.17	0.09	0.38	0.41	1.29
Plexaurella spp.	1	0	2.48	7.44	2.99	Aplysina cauliformis	0.21	0.22	0.37	0.44	1.29
Pseudoplexaura spp.	1	0	2.48	7.44	2.99	Lobophora canariensis	0.46	0.39	0.37	0.44	1.27
Sporochnus bolleanus	0	0.91	2.48	7.44	2.99	Green filamentous algae	0.04	0.13	0.37	0.37	1.26
Brown fleshy crust	1	0	2.48	7.44	2.99
Aplysina fistularis	1	0	2.48	7.44	2.99	Groups PL & TIG
Ellisella atlantica/elongata	0	0.73	2.25	2.71	2.71	Average dissimilarity = 40.93
Palythoa caribaeorum	0.9	0	2.18	2.76	2.62
Hydroid sp. 1	0	0.73	2.15	2.34	2.59		Group PL	Group TIG
Tanacetipathes tanacetum	0	0.73	1.94	1.89	2.34	Species	Av.Abund	Av.Abund	Av.Diss	Diss/SD	Contrib%
Millepora alcicornis	0.8	0	1.89	1.91	2.28	Placogorgia spp.	0.17	0.35	2.12	1.04	5.18
Cladophora sp.	0	0.82	1.88	1.72	2.27	Madracis myriaster	0.33	0.39	1.86	0.92	4.56
Membranous red blades	0	0.64	1.85	1.72	2.23	Tanacetipathes tanacetum	0.22	0.43	1.66	0.97	4.06
Orange-red encrusting sponge	0.3	1	1.73	1.47	2.09	Ellisella atlantica/elongata	0.28	0.22	1.61	0.9	3.92
Stichopathes spp.	0	0.55	1.72	1.46	2.07	Yellow encrusting sponge	0.44	0.39	1.39	0.69	3.41
Agaricia fragilis	0.7	0	1.67	1.48	2.01	Creamy-white encrusting sponge	0.22	0.26	1.39	0.72	3.38
Ellisella grandis	0	0.55	1.67	1.47	2.01	Asteroidea sp. 2	0.22	0.04	1.29	0.65	3.15
Plexaura homomalla	0.6	0	1.52	1.19	1.83	Nicella sp.	0.11	0.17	1.28	0.69	3.13
Meandrina meandrites	0.6	0	1.4	1.18	1.69	Copidaster schismochilus	0.28	0	1.26	0.66	3.08
Stephanocoeania intersepta/Siderastrea radians	0.6	0	1.37	1.2	1.65	Antipathes atlantica	0.28	0.39	1.25	0.72	3.06
Aplysina cauliformis	0.6	0	1.37	1.2	1.65	Ophiuroidea	0.56	0.17	1.19	0.63	2.91
						Parazonanthidae	0.39	0.3	0.93	0.53	2.27
Groups 60m & 150m						Madrepora oculata	0.06	0.09	0.91	0.56	2.22
Average dissimilarity = 80.30						Viminella sp.	0.11	0.09	0.87	0.53	2.14
						Purple encruster	0.11	0.09	0.86	0.57	2.11
	Group 60	Group 150				Asteroidea sp. 4	0.11	0.09	0.86	0.53	2.1
Species	Av.Abund	Av.Abund	Av.Diss	Diss/SD	Contrib%	Distichopathes filix	0.44	0.3	0.86	0.5	2.1
Stichopathes spp.	0.08	1	3.87	3.11	4.82	Light-green encrusting sponge	0.06	0.22	0.83	0.57	2.02
Tanacetipathes tanacetum	0.25	1	3.6	2.27	4.48	Dark green encruster	0.22	0.09	0.81	0.54	1.98
Sporochnus bolleanus	0.75	0	3.6	2.27	4.48	Sporochnus bolleanus	0.22	0.13	0.8	0.57	1.96
Antipathes atlantica	0.17	0.9	3.36	1.84	4.18	Caryophyllidae	0.06	0.09	0.79	0.49	1.93
Dark green encruster	0	0.8	3.3	1.71	4.11	Antipathes furcata	0.22	0.04	0.69	0.5	1.69
Yellow encrusting sponge	0	0.7	2.86	1.36	3.56	Membranous red blades	0.11	0.09	0.67	0.5	1.64
Parazonanthidae	0	0.7	2.79	1.35	3.47	Crustose coralline algae	0.78	0.91	0.64	0.4	1.57
Dasya spp.	0.75	0	2.74	1.75	3.42	Hypnogorgia sp.	0.39	0.35	0.63	0.4	1.55
Caulerpa mexicana	0.5	0	2.59	1.11	3.23	Red filamentous algae	0.17	0	0.63	0.47	1.53
Caulerpa mexicana	0.5	0	2.59	1.11	3.23	White-brown encrusting sponge	0.17	0.13	0.62	0.47	1.52
Creamy-white encrusting sponge	0	0.6	2.57	1.11	3.2
Caulerpa chemnitzia	0.75	0	2.52	1.48	3.14
Green filamentous algae	0.58	0	2.49	1.48	3.11
Antipathes furcata	0	0.6	2.34	1.12	2.92
Membranous red blades	0.5	0	2.15	1.19	2.68
Dictyopteris spp. /Dictyota spp.	0.67	0	2.1	1.19	2.61
Placogorgia spp.	0	0.5	2.02	0.94	2.52
Viminella sp.	0	0.5	1.98	0.93	2.46
Cladophora sp.	0.5	0	1.85	1.04	2.3
Lobophora canariensis	0.75	0	1.79	0.97	2.22
Verdigellas peltata	0.58	0	1.73	0.98	2.16
Nicella sp.	0	0.4	1.59	0.76	1.98
Groups 30m & 150m
Average dissimilarity = 82.16
	Group 30	Group 150
Species	Av.Abund	Av.Abund	Av.Diss	Diss/SD	Contrib%
Madracis spp.	1	0	2.97	13.11	3.62
Orbicella franksi	1	0	2.97	13.11	3.62
Montastraea cavernosa	1	0	2.97	13.11	3.62
Pseudodiploria strigosa	1	0	2.97	13.11	3.62
Porites astreoides	1	0	2.97	13.11	3.62
Stichopathes spp.	0	1	2.97	13.11	3.62
Tanacetipathes tanacetum	0	1	2.97	13.11	3.62
Antillogorgia spp.	1	0	2.97	13.11	3.62
Dictyopteris spp. /Dictyota spp.	1	0	2.97	13.11	3.62
Lobophora canariensis	1	0	2.97	13.11	3.62
Brown fleshy crust	1	0	2.97	13.11	3.62
Aplysina fistularis	1	0	2.97	13.11	3.62
Millepora alcicornis	1	0	2.97	13.11	3.62
Stephanocoeania intersepta/Siderastrea radians	0.9	0	2.83	4.23	3.44
Dark green encruster	0	0.8	2.61	2.43	3.18
Yellow encrusting sponge	0	0.7	2.56	2.41	3.12
Antipathes atlantica	0	0.9	2.55	2.41	3.1
Agaricia fragilis	0.9	0	2.26	1.78	2.75
Diploria labyrinthiformis	0.9	0	2.26	1.78	2.75
Parazonanthidae	0	0.7	2.03	1.41	2.47
Creamy-white encrusting sponge	0	0.6	2.02	1.42	2.46
Groups 15m & 150m
Average dissimilarity = 87.05
	Group 15	Group 150
Species	Av.Abund	Av.Abund	Av.Diss	Diss/SD	Contrib%
Orbicella franksi	1	0	3.08	13.56	3.54
Montastraea cavernosa	1	0	3.08	13.56	3.54
Diploria labyrinthiformis	1	0	3.08	13.56	3.54
Pseudodiploria strigosa	1	0	3.08	13.56	3.54
Porites astreoides	1	0	3.08	13.56	3.54
Stichopathes spp.	0	1	3.08	13.56	3.54
Tanacetipathes tanacetum	0	1	3.08	13.56	3.54
Antillogorgia spp.	1	0	3.08	13.56	3.54
Eunicea spp.	1	0	3.08	13.56	3.54
Plexaurella spp.	1	0	3.08	13.56	3.54
Pseudoplexaura spp.	1	0	3.08	13.56	3.54
Dictyopteris spp. /Dictyota spp.	1	0	3.08	13.56	3.54
Brown fleshy crust	1	0	3.08	13.56	3.54
Aplysina fistularis	1	0	3.08	13.56	3.54
Dark green encruster	0	0.8	2.71	2.42	3.11
Antipathes atlantica	0	0.9	2.67	2.41	3.07
Yellow encrusting sponge	0	0.7	2.64	2.41	3.04
Palythoa caribaeorum	0.9	0	2.35	1.79	2.7
Aspagaropsis taxiformis	0.3	0	2.14	1.42	2.46
Creamy-white encrusting sponge	0	0.6	2.14	1.42	2.46
Parazonanthidae	0	0.7	2.12	1.42	2.43
Orange-red encrusting sponge	0.3	1	2.09	1.42	2.4
Groups 90m & 150m
Average dissimilarity = 60.73
	Group 90	Group 150
Species	Av.Abund	Av.Abund	Av.Diss	Diss/SD	Contrib%
Dictyopteris spp. /Dictyota spp.	1	0	3.38	7.82	5.57
Sporochnus bolleanus	0.91	0	3.01	2.58	4.96
Dark green encruster	0	0.8	2.77	1.99	4.56
Cladophora sp.	0.82	0	2.64	1.76	4.35
Parazonanthidae	0.09	0.7	2.45	1.61	4.03
Yellow encrusting sponge	0	0.7	2.42	1.63	3.99
Galaxaura sp.	0.55	0	2.42	1.63	3.98
Green filamentous algae	0.55	0	2.41	1.63	3.98
Hydroid sp. 1	0.73	0	2.4	1.63	3.96
Ellisella atlantica/elongata	0.73	0.4	2.28	1.36	3.76
Creamy-white encrusting sponge	0	0.6	2.14	1.26	3.52
Leptogorgia sp.	0.55	0	1.79	0.99	2.94
Membranous red blades	0.64	0	1.78	1.09	2.93
Placogorgia spp.	0	0.5	1.72	1.01	2.84
Stichopathes spp.	0.55	1	1.7	0.93	2.79
Viminella sp.	0	0.5	1.68	1	2.76
Tanacetipathes hirta	0.45	0.4	1.64	0.93	2.7
Dasya spp.	0.45	0	1.54	0.94	2.54
Verdigellas peltata	0.55	0	1.43	0.87	2.36
Nicella sp.	0	0.4	1.33	0.81	2.19
Groups 60m & 200m
Average dissimilarity = 79.26
	Group 60	Group 200
Species	Av.Abund	Av.Abund	Av.Diss	Diss/SD	Contrib%
Hypnogorgia sp.	0	0.94	3.52	2.52	4.44
Stichopathes spp.	0.08	1	3.34	2.07	4.21
Madracis myriaster	0	0.89	3.32	2.05	4.19
Parazonanthidae	0	0.89	3.32	2.08	4.19
Lobophora canariensis	0.75	0	2.85	2.09	3.6
Yellow encrusting sponge	0	0.78	2.8	1.65	3.53
Caulerpa chemnitzia	0.75	0	2.64	1.67	3.33
Dasya spp.	0.75	0	2.52	1.53	3.18
Sporochnus bolleanus	0.75	0	2.5	1.21	3.16
Distichopathes filix	0	0.72	2.42	1.54	3.06
Placogorgia spp.	0	0.67	2.39	1.28	3.02
Dictyopteris spp. /Dictyota spp.	0.67	0	2.36	1.42	2.98
Ophiuroidea	0	0.67	2.33	1.33	2.95
Green filamentous algae	0.58	0	2.05	1.08	2.58
Verdigellas peltata	0.58	0	1.96	1.17	2.48
Red sieve encrusting sponge, cf. Phorbas amaranthus	0.5	0	1.92	1.12	2.42
Cladophora sp.	0.5	0	1.8	0.98	2.27
Creamy-white encrusting sponge	0	0.56	1.78	1.09	2.25
Caulerpa mexicana	0.5	0	1.72	0.78	2.17
Caulerpa mexicana	0.5	0	1.72	0.78	2.17
Antipathes atlantica	0.17	0.33	1.57	0.77	1.98
Membranous red blades	0.5	0	1.56	0.87	1.97
Light-green encrusting sponge	0.33	0	1.5	0.83	1.9
Nicella sp.	0	0.44	1.44	0.87	1.82
Dark green encruster	0	0.39	1.38	0.73	1.75
Groups 30m & 200m
Average dissimilarity = 85.15
	Group 30	Group 200
Species	Av.Abund	Av.Abund	Av.Diss	Diss/SD	Contrib%
Madracis myriaster	0	0.89	2.78	7.59	3.26
Madracis spp.	1	0	2.78	7.59	3.26
Orbicella franksi	1	0	2.78	7.59	3.26
Montastraea cavernosa	1	0	2.78	7.59	3.26
Pseudodiploria strigosa	1	0	2.78	7.59	3.26
Porites astreoides	1	0	2.78	7.59	3.26
Stichopathes spp.	0	1	2.78	7.59	3.26
Antillogorgia spp.	1	0	2.78	7.59	3.26
Hypnogorgia sp.	0	0.94	2.78	7.59	3.26
Dictyopteris spp. /Dictyota spp.	1	0	2.78	7.59	3.26
Lobophora canariensis	1	0	2.78	7.59	3.26
Brown fleshy crust	1	0	2.78	7.59	3.26
Aplysina fistularis	1	0	2.78	7.59	3.26
Millepora alcicornis	1	0	2.78	7.59	3.26
Agaricia fragilis	0.9	0	2.56	3.48	3.01
Diploria labyrinthiformis	0.9	0	2.56	3.48	3.01
Stephanocoeania intersepta/Siderastrea radians	0.9	0	2.5	2.67	2.93
Yellow encrusting sponge	0	0.78	2.38	2.49	2.8
Parazonanthidae	0	0.89	2.36	2.26	2.77
Placogorgia spp.	0	0.67	2.32	2.29	2.72
Scolymia cubensis	0.7	0	1.95	1.5	2.29
Meandrina meandrites	0.7	0	1.93	1.5	2.27
Distichopathes filix	0	0.72	1.7	1.32	1.99
Creamy-white encrusting sponge	0	0.56	1.67	1.32	1.96
Groups 15m & 200m
Average dissimilarity = 88.83
	Group 15	Group 200
Species	Av.Abund	Av.Abund	Av.Diss	Diss/SD	Contrib%
Madracis myriaster	0	0.89	2.8	6.44	3.15
Orbicella franksi	1	0	2.8	6.44	3.15
Montastraea cavernosa	1	0	2.8	6.44	3.15
Diploria labyrinthiformis	1	0	2.8	6.44	3.15
Pseudodiploria strigosa	1	0	2.8	6.44	3.15
Porites astreoides	1	0	2.8	6.44	3.15
Stichopathes spp.	0	1	2.8	6.44	3.15
Antillogorgia spp.	1	0	2.8	6.44	3.15
Eunicea spp.	1	0	2.8	6.44	3.15
Hypnogorgia sp.	0	0.94	2.8	6.44	3.15
Plexaurella spp.	1	0	2.8	6.44	3.15
Pseudoplexaura spp.	1	0	2.8	6.44	3.15
Dictyopteris spp. /Dictyota spp.	1	0	2.8	6.44	3.15
Brown fleshy crust	1	0	2.8	6.44	3.15
Aplysina fistularis	1	0	2.8	6.44	3.15
Palythoa caribaeorum	0.9	0	2.57	3.36	2.89
Yellow encrusting sponge	0	0.78	2.39	2.46	2.69
Parazonanthidae	0	0.89	2.38	2.21	2.68
Millepora alcicornis	0.8	0	2.36	2.47	2.65
Placogorgia spp.	0	0.67	2.32	2.27	2.61
Agaricia fragilis	0.7	0	2.09	1.76	2.35
Stephanocoeania intersepta/Siderastrea radians	0.6	0	1.86	1.52	2.09
Aplysina cauliformis	0.6	0	1.86	1.52	2.09
Orange-red encrusting sponge	0.3	0.94	1.85	1.36	2.09
Plexaura homomalla	0.6	0	1.77	1.24	1.99
Groups 90m & 200m
Average dissimilarity = 73.42
	Group 90	Group 200
Species	Av.Abund	Av.Abund	Av.Diss	Diss/SD	Contrib%
Dictyopteris spp. /Dictyota spp.	1	0	3.15	4.38	4.29
Hypnogorgia sp.	0	0.94	2.97	3.34	4.05
Sporochnus bolleanus	0.91	0	2.88	2.59	3.92
Madracis myriaster	0.27	0.89	2.64	1.91	3.59
Parazonanthidae	0.09	0.89	2.58	1.76	3.52
Cladophora sp.	0.82	0	2.58	1.84	3.52
Yellow encrusting sponge	0	0.78	2.4	1.82	3.27
Hydroid sp. 1	0.73	0	2.12	1.49	2.88
Distichopathes filix	0	0.72	2.1	1.37	2.86
Antipathes atlantica	1	0.33	2.09	1.23	2.85
Ellisella atlantica/elongata	0.73	0.17	2.08	1.31	2.83
Placogorgia spp.	0	0.67	2.07	1.5	2.81
Ophiuroidea	0	0.67	2	1.22	2.73
Membranous red blades	0.64	0	1.89	1.31	2.58
Tanacetipathes tanacetum	0.73	0.22	1.82	1.04	2.47
Ellisella grandis	0.55	0	1.81	1.21	2.46
White-brown encrusting sponge	0.45	0	1.63	1.05	2.22
Leptogorgia sp.	0.55	0	1.61	0.95	2.19
Verdigellas peltata	0.55	0	1.61	1.07	2.19
Creamy-white encrusting sponge	0	0.56	1.57	1.13	2.14
Green filamentous algae	0.55	0	1.51	0.91	2.05
Galaxaura sp.	0.55	0	1.43	0.87	1.95
Lobophora canariensis	0.45	0	1.4	0.96	1.91
Stichopathes spp.	0.55	1	1.4	0.8	1.9
Tanacetipathes hirta	0.45	0.06	1.39	0.92	1.89
Antipathes furcata	0.45	0.11	1.38	0.84	1.87
Groups 150m & 200m
Average dissimilarity = 46.08
	Group 150	Group 200
Species	Av.Abund	Av.Abund	Av.Diss	Diss/SD	Contrib%
Hypnogorgia sp.	0.1	0.94	3.47	2.39	7.52
Tanacetipathes tanacetum	1	0.22	3.22	1.84	7
Creamy-white encrusting sponge	0.6	0.56	3.02	1.71	6.55
Madracis myriaster	0.1	0.89	2.69	1.42	5.83
Antipathes atlantica	0.9	0.33	2.5	1.19	5.42
Ophiuroidea	0	0.67	2.44	1.27	5.3
Antipathes furcata	0.6	0.11	2.42	1.2	5.25
Dark green encruster	0.8	0.39	2.17	1.02	4.7
Viminella sp.	0.5	0.17	2.12	1.08	4.61
Nicella sp.	0.4	0.44	2.11	1.08	4.58
Distichopathes filix	0.3	0.72	1.81	0.93	3.92
Placogorgia spp.	0.5	0.67	1.79	0.88	3.87
Ellisella atlantica/elongata	0.4	0.17	1.51	0.79	3.27
Tanacetipathes hirta	0.4	0.06	1.47	0.79	3.19
Groups 60m & 300m
Average dissimilarity = 90.54
	Group 60	Group 300
Species	Av.Abund	Av.Abund	Av.Diss	Diss/SD	Contrib%
Stichopathes spp.	0.08	1	4.44	2.89	4.9
Sporochnus bolleanus	0.75	0	4.44	2.89	4.9
Ophiuroidea	0	1	4.44	2.89	4.9
Dasya spp.	0.75	0	3.54	2.5	3.91
Crustose coralline algae	0.92	0.11	3.19	1.76	3.52
Yellow encrusting sponge	0	0.78	3.17	1.63	3.5
Coleopleurus floridanus	0	0.67	3.16	1.2	3.49
Caulerpa chemnitzia	0.75	0	3.01	1.74	3.32
Madracis myriaster	0	0.67	2.96	1.13	3.27
Hypnogorgia sp.	0	0.67	2.96	1.13	3.27
Caulerpa mexicana	0.5	0	2.96	1.13	3.27
Caulerpa mexicana	0.5	0	2.96	1.13	3.27
Membranous red blades	0.5	0	2.7	1.34	2.98
Dictyopteris spp. /Dictyota spp.	0.67	0	2.66	1.34	2.93
Lobophora canariensis	0.75	0	2.57	1.34	2.83
Verdigellas peltata	0.58	0	2.49	1.35	2.75
Green filamentous algae	0.58	0	2.45	1.09	2.7
Distichopathes filix	0	0.56	2.23	0.98	2.46
Parazonanthidae	0	0.44	2.22	0.77	2.45
Placogorgia spp.	0	0.56	2.1	1.03	2.32
Orange-red encrusting sponge	0.92	0.56	1.93	0.8	2.13
Cladophora sp.	0.5	0	1.93	0.87	2.13
Groups 30m & 300m
Average dissimilarity = 89.09
	Group 30	Group 300
Species	Av.Abund	Av.Abund	Av.Diss	Diss/SD	Contrib%
Madracis myriaster	0	0.67	3.09	7.68	3.47
Madracis spp.	1	0	3.09	7.68	3.47
Orbicella franksi	1	0	3.09	7.68	3.47
Montastraea cavernosa	1	0	3.09	7.68	3.47
Pseudodiploria strigosa	1	0	3.09	7.68	3.47
Porites astreoides	1	0	3.09	7.68	3.47
Stichopathes spp.	0	1	3.09	7.68	3.47
Antillogorgia spp.	1	0	3.09	7.68	3.47
Hypnogorgia sp.	0	0.67	3.09	7.68	3.47
Dictyopteris spp. /Dictyota spp.	1	0	3.09	7.68	3.47
Lobophora canariensis	1	0	3.09	7.68	3.47
Brown fleshy crust	1	0	3.09	7.68	3.47
Aplysina fistularis	1	0	3.09	7.68	3.47
Millepora alcicornis	1	0	3.09	7.68	3.47
Ophiuroidea	0	1	3.09	7.68	3.47
Crustose coralline algae	1	0.11	2.64	2.09	2.97
Stephanocoeania intersepta/Siderastrea radians	0.9	0	2.61	2.07	2.93
Aplysina cauliformis	0.6	0	2.56	2.06	2.88
Agaricia fragilis	0.9	0	2.49	2.1	2.79
Diploria labyrinthiformis	0.9	0	2.49	2.1	2.79
Distichopathes filix	0	0.56	2.47	2.12	2.78
Parazonanthidae	0	0.44	2.15	1.34	2.41
Groups 15m & 300m
Average dissimilarity = 91.48
	Group 15	Group 300
Species	Av.Abund	Av.Abund	Av.Diss	Diss/SD	Contrib%
Madracis myriaster	0	0.67	3.19	6.1	3.48
Orbicella franksi	1	0	3.19	6.1	3.48
Montastraea cavernosa	1	0	3.19	6.1	3.48
Diploria labyrinthiformis	1	0	3.19	6.1	3.48
Pseudodiploria strigosa	1	0	3.19	6.1	3.48
Porites astreoides	1	0	3.19	6.1	3.48
Stichopathes spp.	0	1	3.19	6.1	3.48
Antillogorgia spp.	1	0	3.19	6.1	3.48
Eunicea spp.	1	0	3.19	6.1	3.48
Hypnogorgia sp.	0	0.67	3.19	6.1	3.48
Plexaurella spp.	1	0	3.19	6.1	3.48
Pseudoplexaura spp.	1	0	3.19	6.1	3.48
Dictyopteris spp. /Dictyota spp.	1	0	3.19	6.1	3.48
Brown fleshy crust	1	0	3.19	6.1	3.48
Aplysina fistularis	1	0	3.19	6.1	3.48
Ophiuroidea	0	1	3.19	6.1	3.48
Palythoa caribaeorum	0.9	0	2.56	2.04	2.79
Distichopathes filix	0	0.56	2.52	2.08	2.75
Parazonanthidae	0	0.44	2.26	1.33	2.47
Crustose coralline algae	0.9	0.11	2.16	1.33	2.36
Millepora alcicornis	0.8	0	1.97	1.33	2.16
Yellow encrusting sponge	0	0.78	1.96	1.34	2.15
Groups 90m & 300m
Average dissimilarity = 85.18
	Group 90	Group 300
Species	Av.Abund	Av.Abund	Av.Diss	Diss/SD	Contrib%
Dictyopteris spp. /Dictyota spp.	1	0	3.76	3.1	4.42
Ophiuroidea	0	1	3.76	3.1	4.42
Madracis myriaster	0.27	0.67	3.48	2.03	4.09
Crustose coralline algae	1	0.11	3.45	1.99	4.04
Cladophora sp.	0.82	0	3.27	1.87	3.84
Sporochnus bolleanus	0.91	0	3.22	1.87	3.78
Antipathes atlantica	1	0.22	3.1	1.48	3.63
Leptogorgia sp.	0.55	0	2.8	1.37	3.29
Yellow encrusting sponge	0	0.78	2.78	1.37	3.27
Coleopleurus floridanus	0	0.67	2.65	1.14	3.12
Galaxaura sp.	0.55	0	2.64	1.56	3.1
Stichopathes spp.	0.55	1	2.52	1.12	2.96
Hypnogorgia sp.	0	0.67	2.43	1.56	2.86
Hydroid sp. 1	0.73	0	2.43	1.56	2.86
Tanacetipathes tanacetum	0.73	0.11	2.28	1.01	2.67
Antipathes furcata	0.45	0	2.28	1.19	2.67
Green filamentous algae	0.55	0	2.28	1.19	2.67
Ellisella atlantica/elongata	0.73	0	2.09	1.19	2.46
Verdigellas peltata	0.55	0	2.02	1.17	2.37
Dasya spp.	0.45	0	1.94	1.19	2.28
Membranous red blades	0.64	0	1.94	1.19	2.28
Orange-red encrusting sponge	1	0.56	1.92	0.8	2.25
Distichopathes filix	0	0.56	1.9	1.21	2.23
Groups 150m & 300m
Average dissimilarity = 69.06
	Group 150	Group 300
Species	Av.Abund	Av.Abund	Av.Diss	Diss/SD	Contrib%
Ophiuroidea	0	1	4.56	6.61	6.6
Antipathes atlantica	0.9	0.22	4.42	3.99	6.4
Crustose coralline algae	1	0.11	4.42	3.99	6.4
Tanacetipathes tanacetum	1	0.11	4.41	3.96	6.38
Coleopleurus floridanus	0	0.67	3.54	1.61	5.13
Dark green encruster	0.8	0.11	3.42	1.61	4.95
Hypnogorgia sp.	0.1	0.67	3.35	1.77	4.85
Antipathes furcata	0.6	0	3.17	1.36	4.6
Creamy-white encrusting sponge	0.6	0.11	3.14	1.45	4.55
Orange-red encrusting sponge	1	0.56	2.86	1.16	4.14
Madracis myriaster	0.1	0.67	2.82	1.36	4.09
Yellow encrusting sponge	0.7	0.78	2.64	1.07	3.83
Placogorgia spp.	0.5	0.56	2.46	1.08	3.56
Distichopathes filix	0.3	0.56	2.41	1.08	3.49
Nicella sp.	0.4	0.33	2.33	1.08	3.38
Groups 200m & 300m
Average dissimilarity = 43.46
	Group 200	Group 300
Species	Av.Abund	Av.Abund	Av.Diss	Diss/SD	Contrib%
Crustose coralline algae	0.83	0.11	3.26	1.32	7.51
Coleopleurus floridanus	0	0.67	3.2	1.21	7.36
Parazonanthidae	0.89	0.44	2.69	1.06	6.19
Distichopathes filix	0.72	0.56	2.67	0.96	6.14
Orange-red encrusting sponge	0.94	0.56	2.18	0.77	5.02
Yellow encrusting sponge	0.78	0.78	2.01	0.75	4.62
Dark green encruster	0.39	0.11	1.86	0.9	4.27
Asteroidea sp. 2	0.33	0	1.83	0.75	4.22
Asteroidea sp. 4	0.33	0.11	1.56	0.74	3.59
Caryophyllidae	0.28	0.11	1.49	0.64	3.43
Antipathes atlantica	0.33	0.22	1.48	0.76	3.41
Asteroidea sp. 1	0	0.33	1.48	0.66	3.41
Copidaster schismochilus	0.22	0.11	1.46	0.65	3.36
Ophiuroidea	0.67	1	1.41	0.66	3.25
Hypnogorgia sp.	0.94	0.67	1.33	0.56	3.07
Yellow-green encrusting sponge	1	0.78	1.3	0.52	2.98
Groups 60m & 250m
Average dissimilarity = 82.88
	Group 60	Group 250
Species	Av.Abund	Av.Abund	Av.Diss	Diss/SD	Contrib%
Distichopathes filix	0	1	4.01	2.8	4.84
Hypnogorgia sp.	0	1	4.01	2.8	4.84
Stichopathes spp.	0.08	1	3.78	2.19	4.56
Madracis myriaster	0	0.91	3.68	1.99	4.44
Sporochnus bolleanus	0.75	0	3.3	1.55	3.98
Yellow encrusting sponge	0	0.82	3.11	1.8	3.75
Dasya spp.	0.75	0	2.83	1.8	3.41
Caulerpa chemnitzia	0.75	0	2.73	1.66	3.3
Parazonanthidae	0	0.64	2.54	1.09	3.07
Lobophora canariensis	0.75	0	2.5	1.58	3.02
Caulerpa mexicana	0.5	0	2.39	0.92	2.88
Caulerpa mexicana	0.5	0	2.39	0.92	2.88
Dictyopteris spp. /Dictyota spp.	0.67	0	2.33	1.37	2.81
Placogorgia spp.	0	0.64	2.32	1.23	2.79
Ophiuroidea	0	0.64	2.24	1.23	2.7
Creamy-white encrusting sponge	0	0.64	2.17	1.28	2.62
Green filamentous algae	0.58	0	2.16	1.12	2.6
Verdigellas peltata	0.58	0	2.07	1.2	2.5
Membranous red blades	0.5	0	1.99	1.05	2.41
Crustose coralline algae	0.92	0.45	1.97	0.95	2.38
Cladophora sp.	0.5	0	1.74	0.94	2.1
Red sieve encrusting sponge, cf. Phorbas amaranthus	0.5	0	1.65	0.95	1.99
Nicella sp.	0	0.45	1.51	0.9	1.82
Groups 30m & 250m
Average dissimilarity = 85.79
	Group 30	Group 250
Species	Av.Abund	Av.Abund	Av.Diss	Diss/SD	Contrib%
Madracis myriaster	0	0.91	2.98	8.21	3.48
Madracis spp.	1	0	2.98	8.21	3.48
Orbicella franksi	1	0	2.98	8.21	3.48
Montastraea cavernosa	1	0	2.98	8.21	3.48
Pseudodiploria strigosa	1	0	2.98	8.21	3.48
Porites astreoides	1	0	2.98	8.21	3.48
Stichopathes spp.	0	1	2.98	8.21	3.48
Distichopathes filix	0	1	2.98	8.21	3.48
Antillogorgia spp.	1	0	2.98	8.21	3.48
Hypnogorgia sp.	0	1	2.98	8.21	3.48
Dictyopteris spp. /Dictyota spp.	1	0	2.98	8.21	3.48
Lobophora canariensis	1	0	2.98	8.21	3.48
Brown fleshy crust	1	0	2.98	8.21	3.48
Aplysina fistularis	1	0	2.98	8.21	3.48
Millepora alcicornis	1	0	2.98	8.21	3.48
Stephanocoeania intersepta/Siderastrea radians	0.9	0	2.65	2.55	3.09
Agaricia fragilis	0.9	0	2.57	2.61	2.99
Diploria labyrinthiformis	0.9	0	2.57	2.61	2.99
Yellow encrusting sponge	0	0.82	2.55	2.64	2.98
Placogorgia spp.	0	0.64	2.18	1.77	2.54
Parazonanthidae	0	0.64	2.16	1.56	2.52
Meandrina meandrites	0.7	0	2.04	1.43	2.37
Groups 15m & 250m
Average dissimilarity = 89.98
	Group 15	Group 250
Species	Av.Abund	Av.Abund	Av.Diss	Diss/SD	Contrib%
Madracis myriaster	0	0.91	3.04	6.49	3.38
Orbicella franksi	1	0	3.04	6.49	3.38
Montastraea cavernosa	1	0	3.04	6.49	3.38
Diploria labyrinthiformis	1	0	3.04	6.49	3.38
Pseudodiploria strigosa	1	0	3.04	6.49	3.38
Porites astreoides	1	0	3.04	6.49	3.38
Stichopathes spp.	0	1	3.04	6.49	3.38
Distichopathes filix	0	1	3.04	6.49	3.38
Antillogorgia spp.	1	0	3.04	6.49	3.38
Eunicea spp.	1	0	3.04	6.49	3.38
Hypnogorgia sp.	0	1	3.04	6.49	3.38
Plexaurella spp.	1	0	3.04	6.49	3.38
Pseudoplexaura spp.	1	0	3.04	6.49	3.38
Dictyopteris spp. /Dictyota spp.	1	0	3.04	6.49	3.38
Brown fleshy crust	1	0	3.04	6.49	3.38
Aplysina fistularis	1	0	3.04	6.49	3.38
Palythoa caribaeorum	0.9	0	2.61	2.53	2.9
Yellow encrusting sponge	0	0.82	2.58	2.59	2.86
Millepora alcicornis	0.8	0	2.21	1.74	2.45
Parazonanthidae	0	0.64	2.19	1.54	2.44
Placogorgia spp.	0	0.64	2.18	1.76	2.42
Orange-red encrusting sponge	0.3	1	2.1	1.43	2.33
Agaricia fragilis	0.7	0	1.89	1.32	2.1
Groups 90m & 250m
Average dissimilarity = 76.86
	Group 90	Group 250
Species	Av.Abund	Av.Abund	Av.Diss	Diss/SD	Contrib%
Distichopathes filix	0	1	3.33	5.06	4.33
Hypnogorgia sp.	0	1	3.33	5.06	4.33
Dictyopteris spp. /Dictyota spp.	1	0	3.33	5.06	4.33
Sporochnus bolleanus	0.91	0	3	2.48	3.9
Ellisella atlantica/elongata	0.73	0.18	2.82	1.99	3.67
Cladophora sp.	0.82	0	2.74	1.97	3.56
Yellow encrusting sponge	0	0.82	2.65	2.01	3.45
Madracis myriaster	0.27	0.91	2.62	1.68	3.41
Hydroid sp. 1	0.73	0	2.34	1.52	3.04
Tanacetipathes tanacetum	0.73	0	2.32	1.4	3.02
Antipathes atlantica	1	0.27	2.3	1.39	3
Parazonanthidae	0.09	0.64	2.11	1.31	2.75
Placogorgia spp.	0	0.64	2.01	1.34	2.61
Galaxaura sp.	0.55	0	1.99	1.15	2.58
Membranous red blades	0.64	0	1.95	1.23	2.54
Leptogorgia sp.	0.55	0	1.93	1.13	2.51
Creamy-white encrusting sponge	0	0.64	1.9	1.24	2.47
Green filamentous algae	0.55	0	1.9	1.08	2.47
Ophiuroidea	0	0.64	1.89	1.14	2.46
Crustose coralline algae	1	0.45	1.85	1.07	2.41
Verdigellas peltata	0.55	0	1.71	1.08	2.22
Stichopathes spp.	0.55	1	1.71	0.95	2.22
Antipathes furcata	0.45	0	1.7	0.95	2.21
Dasya spp.	0.45	0	1.54	0.94	2
Groups 150m & 250m
Average dissimilarity = 52.13
	Group 150	Group 250
Species	Av.Abund	Av.Abund	Av.Diss	Diss/SD	Contrib%
Tanacetipathes tanacetum	1	0	4.06	7.87	7.78
Hypnogorgia sp.	0.1	1	3.69	2.71	7.08
Creamy-white encrusting sponge	0.6	0.64	3.52	2.32	6.75
Madracis myriaster	0.1	0.91	3.34	2.05	6.4
Dark green encruster	0.8	0.18	3.04	1.55	5.83
Distichopathes filix	0.3	1	3	1.55	5.75
Antipathes furcata	0.6	0	2.49	1.24	4.79
Nicella sp.	0.4	0.45	2.3	1.15	4.42
Crustose coralline algae	1	0.45	2.28	1.07	4.38
Ophiuroidea	0	0.64	2.24	1.16	4.29
Antipathes atlantica	0.9	0.27	2.16	0.99	4.14
Placogorgia spp.	0.5	0.64	2.07	1	3.97
Viminella sp.	0.5	0	2.05	1	3.94
Parazonanthidae	0.7	0.64	1.65	0.82	3.17
Groups 200m & 250m
Average dissimilarity = 28.28
	Group 200	Group 250
Species	Av.Abund	Av.Abund	Av.Diss	Diss/SD	Contrib%
Crustose coralline algae	0.83	0.45	1.86	0.94	6.58
Asteroidea sp. 4	0.33	0.27	1.72	0.86	6.09
Parazonanthidae	0.89	0.64	1.66	0.82	5.88
Dark green encruster	0.39	0.18	1.62	0.84	5.74
Madrepora oculata	0.06	0.27	1.45	0.75	5.12
Ophiuroidea	0.67	0.64	1.39	0.74	4.92
Antipathes atlantica	0.33	0.27	1.28	0.67	4.54
Distichopathes filix	0.72	1	1.26	0.59	4.46
Purple encruster	0.22	0.27	1.23	0.76	4.35
Yellow encrusting sponge	0.78	0.82	1.16	0.59	4.09
Asteroidea sp. 2	0.33	0.27	1.1	0.65	3.88
Caryophyllidae	0.28	0	1.02	0.58	3.62
Coleopleurus floridanus	0	0.27	1	0.57	3.54
Placogorgia spp.	0.67	0.64	0.99	0.53	3.49
Copidaster schismochilus	0.22	0.18	0.95	0.59	3.36
Creamy-white encrusting sponge	0.56	0.64	0.93	0.54	3.3
Groups 300m & 250m
Average dissimilarity = 37.38
	Group 300	Group 250
Species	Av.Abund	Av.Abund	Av.Diss	Diss/SD	Contrib%
Orange-red encrusting sponge	0.56	1	2.42	0.86	6.47
Distichopathes filix	0.56	1	2.41	0.86	6.44
Crustose coralline algae	0.11	0.45	2.22	0.91	5.95
Creamy-white encrusting sponge	0.11	0.64	1.85	0.85	4.96
Parazonanthidae	0.44	0.64	1.84	0.85	4.92
Antipathes atlantica	0.22	0.27	1.83	0.85	4.89
Hypnogorgia sp.	0.67	1	1.74	0.69	4.66
Coleopleurus floridanus	0.67	0.27	1.59	0.66	4.24
Asteroidea sp. 1	0.33	0	1.53	0.67	4.08
Yellow encrusting sponge	0.78	0.82	1.49	0.63	3.99
Placogorgia spp.	0.56	0.64	1.46	0.63	3.91
Asteroidea sp. 2	0	0.27	1.32	0.68	3.53
Purple encruster	0	0.27	1.28	0.68	3.43
Ophiuroidea	1	0.64	1.22	0.52	3.26
Ellisella atlantica/elongata	0	0.18	1.21	0.52	3.24
Yellow-green encrusting sponge	0.78	1	1.19	0.52	3.19

## Sheet: Sheet4
Two-way crossed SIMPER (Similarity Percentages - species contributions)
Data type: Abundance
Factor: Depth x Site
Resemblance: Bray-Curtis similarity
Cut off for low contributions: 70.00%
Examines Depth groups							Examines Site groups
(across all Site groups)							(across all Depth groups)
Group 60m							Group SP
Average similarity: 69.31							Average similarity: 72.50
Species	Av.Abund	Av.Sim	Sim/SD	Contrib%	Cum.%		Species	Av.Abund	Av.Sim	Sim/SD	Contrib%	Cum.%
Sporochnus bolleanus	0.75	5.72	1.38	8.25	8.25		Yellow-green encrusting sponge	0.96	7.09	2.64	9.78	9.78
Crustose coralline algae	0.92	5.56	2.07	8.02	16.28		Orange-red encrusting sponge	0.81	5.54	1.52	7.64	17.41
Orange-red encrusting sponge	0.92	5.56	2.07	8.02	24.3		Stichopathes spp.	0.62	5.43	1.26	7.49	24.9
Yellow-green encrusting sponge	0.92	5.56	2.07	8.02	32.32		Crustose coralline algae	0.65	3.83	1.13	5.28	30.18
Lobophora canariensis	0.75	4.94	1.62	7.13	39.45		Parazonanthidae	0.46	3.64	0.81	5.02	35.2
Caulerpa mexicana	0.5	4.22	0.87	6.09	45.54		Antipathes atlantica	0.46	3.47	0.94	4.79	39.99
Caulerpa mexicana	0.5	4.22	0.87	6.09	51.62		Madracis myriaster	0.35	2.91	0.62	4.01	44
Dasya spp.	0.75	3.68	1.12	5.31	56.94		Hypnogorgia sp.	0.35	2.91	0.62	4.01	48.01
Caulerpa chemnitzia	0.75	3.3	0.95	4.76	61.7		Tanacetipathes tanacetum	0.31	2.52	0.72	3.48	51.49
Green filamentous algae	0.58	2.71	0.8	3.92	65.61		Creamy-white encrusting sponge	0.19	2.33	0.67	3.21	54.7
Dictyopteris spp. /Dictyota spp.	0.67	2.62	0.81	3.78	69.39		Yellow encrusting sponge	0.35	1.92	0.57	2.65	57.35
Red sieve encrusting sponge, cf. Phorbas amaranthus	0.5	2.2	0.67	3.18	72.57		Dark green encruster	0.23	1.76	0.53	2.43	59.78
							Sporochnus bolleanus	0.23	1.62	0.45	2.23	62.01
Group 30m							Dictyopteris spp. /Dictyota spp.	0.38	1.62	0.63	2.23	64.24
Average similarity: 86.70							Antipathes furcata	0.23	1.3	0.48	1.79	66.03
							Distichopathes filix	0.23	1.27	0.38	1.75	67.79
Species	Av.Abund	Av.Sim	Sim/SD	Contrib%	Cum.%		Caulerpa mexicana	0.12	1.03	0.31	1.42	69.21
Madracis spp.	1	4.58	12.73	5.28	5.28		Caulerpa mexicana	0.12	1.03	0.31	1.42	70.62
Orbicella franksi	1	4.58	12.73	5.28	10.56
Montastraea cavernosa	1	4.58	12.73	5.28	15.84		Group NNE
Pseudodiploria strigosa	1	4.58	12.73	5.28	21.13		Average similarity: 79.65
Porites astreoides	1	4.58	12.73	5.28	26.41
Antillogorgia spp.	1	4.58	12.73	5.28	31.69		Species	Av.Abund	Av.Sim	Sim/SD	Contrib%	Cum.%
Dictyopteris spp. /Dictyota spp.	1	4.58	12.73	5.28	36.97		Yellow-green encrusting sponge	1	5.64	6.1	7.08	7.08
Lobophora canariensis	1	4.58	12.73	5.28	42.25		Orange-red encrusting sponge	0.92	5.15	2.57	6.47	13.55
Brown fleshy crust	1	4.58	12.73	5.28	47.53		Crustose coralline algae	0.83	4.19	1.79	5.26	18.81
Crustose coralline algae	1	4.58	12.73	5.28	52.81		Madracis myriaster	0.5	3.53	1.12	4.43	23.24
Aplysina fistularis	1	4.58	12.73	5.28	58.1		Stichopathes spp.	0.54	3.53	1.12	4.43	27.67
Orange-red encrusting sponge	1	4.58	12.73	5.28	63.38		Distichopathes filix	0.46	3.53	1.12	4.43	32.09
Yellow-green encrusting sponge	1	4.58	12.73	5.28	68.66		Nicella sp.	0.46	3.53	1.12	4.43	36.52
Millepora alcicornis	1	4.58	12.73	5.28	73.94		Hypnogorgia sp.	0.46	3.53	1.12	4.43	40.95
							Placogorgia spp.	0.46	3.53	1.12	4.43	45.38
Group 15m							Creamy-white encrusting sponge	0.38	2.8	0.91	3.51	48.89
Average similarity: 87.09							Yellow encrusting sponge	0.46	2.65	0.84	3.33	52.22
							Ophiuroidea	0.38	2.07	0.67	2.59	54.82
Species	Av.Abund	Av.Sim	Sim/SD	Contrib%	Cum.%		Parazonanthidae	0.38	1.98	0.67	2.48	57.3
Orbicella franksi	1	4.66	8.12	5.35	5.35		Lobophora canariensis	0.46	1.78	0.71	2.23	59.53
Montastraea cavernosa	1	4.66	8.12	5.35	10.69		Dictyopteris spp. /Dictyota spp.	0.46	1.66	0.72	2.09	61.62
Diploria labyrinthiformis	1	4.66	8.12	5.35	16.04		Callogorgia spp.	0.21	1.21	0.51	1.52	63.14
Pseudodiploria strigosa	1	4.66	8.12	5.35	21.39		Codium sp.	0.25	1.12	0.5	1.41	64.55
Porites astreoides	1	4.66	8.12	5.35	26.73		Dasya spp.	0.25	1.12	0.5	1.41	65.95
Antillogorgia spp.	1	4.66	8.12	5.35	32.08		Verdigellas peltata	0.25	1.12	0.5	1.41	67.36
Eunicea spp.	1	4.66	8.12	5.35	37.43		Sporochnus bolleanus	0.25	1.12	0.5	1.41	68.77
Plexaurella spp.	1	4.66	8.12	5.35	42.77		Orbicella franksi	0.25	0.99	0.51	1.24	70.01
Pseudoplexaura spp.	1	4.66	8.12	5.35	48.12
Dictyopteris spp. /Dictyota spp.	1	4.66	8.12	5.35	53.46		Group PL
Brown fleshy crust	1	4.66	8.12	5.35	58.81		Average similarity: 67.76
Aplysina fistularis	1	4.66	8.12	5.35	64.16
Yellow-green encrusting sponge	1	4.66	8.12	5.35	69.5		Species	Av.Abund	Av.Sim	Sim/SD	Contrib%	Cum.%
Crustose coralline algae	0.9	3.74	2.08	4.3	73.8		Stichopathes spp.	0.72	7.69	1.46	11.35	11.35
							Ophiuroidea	0.56	6.5	1.08	9.6	20.95
Group 90m							Orange-red encrusting sponge	0.89	6.39	2.11	9.42	30.37
Average similarity: 75.78							Yellow-green encrusting sponge	0.89	6.39	2.11	9.42	39.8
							Crustose coralline algae	0.78	5.6	1.56	8.27	48.07
Species	Av.Abund	Av.Sim	Sim/SD	Contrib%	Cum.%		Distichopathes filix	0.44	3.86	0.91	5.7	53.76
Antipathes atlantica	1	5.42	4.99	7.15	7.15		Coleopleurus floridanus	0.33	3.83	0.6	5.66	59.42
Dictyopteris spp. /Dictyota spp.	1	5.42	4.99	7.15	14.31		Yellow encrusting sponge	0.44	3.42	0.54	5.05	64.47
Crustose coralline algae	1	5.42	4.99	7.15	21.46		Parazonanthidae	0.39	3.05	0.73	4.5	68.97
Orange-red encrusting sponge	1	5.42	4.99	7.15	28.61		Hypnogorgia sp.	0.39	2.41	0.66	3.56	72.53
Yellow-green encrusting sponge	1	5.42	4.99	7.15	35.77
Sporochnus bolleanus	0.91	4.68	2.54	6.18	41.94		Group TIG
Ellisella atlantica/elongata	0.73	3.82	1.41	5.04	46.98		Average similarity: 75.67
Hydroid sp. 1	0.73	3.6	1.38	4.75	51.73
Cladophora sp.	0.82	3.16	1.09	4.17	55.9		Species	Av.Abund	Av.Sim	Sim/SD	Contrib%	Cum.%
Tanacetipathes tanacetum	0.73	2.57	0.93	3.39	59.3		Yellow-green encrusting sponge	1	6.06	3.5	8.01	8.01
Membranous red blades	0.64	2.37	0.92	3.12	62.42		Crustose coralline algae	0.91	4.59	1.83	6.07	14.08
Galaxaura sp.	0.55	2.24	0.76	2.95	65.37		Orange-red encrusting sponge	0.83	4.08	1.32	5.39	19.47
Stichopathes spp.	0.55	2.19	0.77	2.89	68.26		Stichopathes spp.	0.57	3.89	1.06	5.14	24.61
Leptogorgia sp.	0.55	2	0.73	2.64	70.9		Madracis myriaster	0.39	3.42	0.9	4.52	29.13
							Hypnogorgia sp.	0.35	3.42	0.9	4.52	33.66
Group 150m							Yellow encrusting sponge	0.39	3.42	0.9	4.52	38.18
Average similarity: 71.10							Placogorgia spp.	0.35	2.29	0.66	3.03	41.21
							Dictyopteris spp. /Dictyota spp.	0.57	2.19	0.91	2.89	44.1
Species	Av.Abund	Av.Sim	Sim/SD	Contrib%	Cum.%		Parazonanthidae	0.3	1.95	0.63	2.58	46.68
Antipathes atlantica	0.9	7.28	10.56	10.24	10.24		Tanacetipathes tanacetum	0.43	1.63	0.58	2.16	48.84
Stichopathes spp.	1	7.28	10.56	10.24	20.49		Agaricia fragilis	0.35	1.51	0.73	2	50.84
Tanacetipathes tanacetum	1	7.28	10.56	10.24	30.73		Orbicella franksi	0.35	1.51	0.73	2	52.83
Crustose coralline algae	1	7.28	10.56	10.24	40.98		Montastraea cavernosa	0.39	1.51	0.73	2	54.83
Orange-red encrusting sponge	1	7.28	10.56	10.24	51.22		Diploria labyrinthiformis	0.35	1.51	0.73	2	56.83
Yellow-green encrusting sponge	1	7.28	10.56	10.24	61.47		Pseudodiploria strigosa	0.35	1.51	0.73	2	58.83
Creamy-white encrusting sponge	0.6	5.55	1.72	7.81	69.27		Porites astreoides	0.35	1.51	0.73	2	60.82
Dark green encruster	0.8	4.13	1.03	5.81	75.08		Stephanocoeania intersepta/Siderastrea radians	0.35	1.51	0.73	2	62.82
							Antillogorgia spp.	0.35	1.51	0.73	2	64.82
Group 200m							Brown fleshy crust	0.39	1.51	0.73	2	66.81
Average similarity: 69.93							Aplysina fistularis	0.35	1.51	0.73	2	68.81
							Millepora alcicornis	0.35	1.51	0.73	2	70.81
Species	Av.Abund	Av.Sim	Sim/SD	Contrib%	Cum.%
Stichopathes spp.	1	7.23	4.6	10.34	10.34		Groups SP & NNE
Yellow-green encrusting sponge	1	7.23	4.6	10.34	20.68		Average dissimilarity = 33.32
Hypnogorgia sp.	0.94	6.42	2.59	9.18	29.86
Orange-red encrusting sponge	0.94	6	2.07	8.57	38.43			Group SP	Group NNE
Madracis myriaster	0.89	5.95	2.07	8.51	46.94		Species	Av.Abund	Av.Abund	Av.Diss	Diss/SD	Contrib%	Cum.%
Parazonanthidae	0.89	5.32	1.52	7.61	54.56		Nicella sp.	0.12	0.46	1.89	0.96	5.66	5.66
Crustose coralline algae	0.83	5.16	1.65	7.38	61.94		Creamy-white encrusting sponge	0.19	0.38	1.66	0.86	4.97	10.63
Yellow encrusting sponge	0.78	4.64	1.35	6.63	68.57		Antipathes atlantica	0.46	0.29	1.31	0.7	3.93	14.56
Distichopathes filix	0.72	4.41	1.26	6.3	74.87		Crustose coralline algae	0.65	0.83	1.15	0.65	3.46	18.02
							Placogorgia spp.	0.27	0.46	1.12	0.6	3.36	21.37
Group 300m							Asteroidea sp. 2	0.04	0.25	1	0.58	3	24.37
Average similarity: 69.11							Distichopathes filix	0.23	0.46	0.97	0.58	2.9	27.27
							Lobophora canariensis	0.15	0.46	0.96	0.63	2.89	30.16
Species	Av.Abund	Av.Sim	Sim/SD	Contrib%	Cum.%		Yellow encrusting sponge	0.35	0.46	0.89	0.52	2.67	32.83
Stichopathes spp.	1	11.34	2.55	16.41	16.41		Codium sp.	0	0.25	0.79	0.53	2.38	35.22
Ophiuroidea	1	11.34	2.55	16.41	32.83		Ophiuroidea	0.19	0.38	0.74	0.48	2.21	37.42
Yellow encrusting sponge	0.78	7.86	1.07	11.37	44.2		Callogorgia spp.	0	0.21	0.73	0.5	2.19	39.62
Coleopleurus floridanus	0.67	6.89	0.83	9.97	54.16		Dark green encruster	0.23	0.25	0.72	0.48	2.17	41.79
Madracis myriaster	0.67	5.76	1.24	8.34	62.5		Asteroidea sp. 4	0.04	0.21	0.71	0.48	2.12	43.91
Hypnogorgia sp.	0.67	5.76	1.24	8.34	70.84		Orange-red encrusting sponge	0.81	0.92	0.7	0.44	2.1	46.01
							Parazonanthidae	0.46	0.38	0.7	0.46	2.1	48.11
Group 250m							Chironephthya	0.08	0.08	0.61	0.43	1.82	49.93
Average similarity: 73.90							Udotea cyanthiformis	0	0.17	0.58	0.41	1.75	51.68
							Caryophyllidae	0.12	0.08	0.56	0.41	1.69	53.37
Species	Av.Abund	Av.Sim	Sim/SD	Contrib%	Cum.%		Verdigellas peltata	0.08	0.25	0.56	0.41	1.68	55.05
Stichopathes spp.	1	8.09	5.05	10.95	10.95		Tanacetipathes hirta	0.08	0.17	0.54	0.42	1.62	56.67
Distichopathes filix	1	8.09	5.05	10.95	21.91		Tanacetipathes tanacetum	0.31	0.17	0.54	0.43	1.61	58.28
Hypnogorgia sp.	1	8.09	5.05	10.95	32.86		Antipathes furcata	0.23	0.08	0.52	0.43	1.57	59.85
Orange-red encrusting sponge	1	8.09	5.05	10.95	43.81		Chladophoropsis macromeres	0.04	0.17	0.5	0.44	1.5	61.35
Yellow-green encrusting sponge	1	8.09	5.05	10.95	54.76		Green filamentous algae	0.19	0.04	0.49	0.43	1.48	62.83
Madracis myriaster	0.91	6.52	1.72	8.83	63.59		Red sieve encrusting sponge, cf. Phorbas amaranthus	0	0.13	0.49	0.36	1.47	64.29
Yellow encrusting sponge	0.82	4.44	1.15	6.01	69.6		Purple encruster	0	0.13	0.47	0.37	1.42	65.72
Ophiuroidea	0.64	4.26	1.15	5.77	75.37		Peyssonnelia spp.	0.08	0.17	0.47	0.42	1.41	67.13
							Copidaster schismochilus	0	0.13	0.44	0.37	1.33	68.45
Groups 60m & 30m							Caulerpa chemnitzia	0.08	0.21	0.41	0.34	1.22	69.67
Average dissimilarity = 74.47							Plexaura homomalla	0.08	0.08	0.39	0.44	1.18	70.86
	Group 60	Group 30					Groups SP & PL
Species	Av.Abund	Av.Abund	Av.Diss	Diss/SD	Contrib%	Cum.%	Average dissimilarity = 42.95
Madracis spp.	0	1	2.94	5.55	3.95	3.95
Orbicella franksi	0	1	2.94	5.55	3.95	7.89		Group SP	Group PL
Pseudodiploria strigosa	0	1	2.94	5.55	3.95	11.84	Species	Av.Abund	Av.Abund	Av.Diss	Diss/SD	Contrib%	Cum.%
Porites astreoides	0	1	2.94	5.55	3.95	15.78	Madracis myriaster	0.35	0.33	2.04	0.76	4.75	4.75
Antillogorgia spp.	0	1	2.94	5.55	3.95	19.73	Yellow encrusting sponge	0.35	0.44	1.98	0.79	4.62	9.36
Aplysina fistularis	0	1	2.94	5.55	3.95	23.67	Distichopathes filix	0.23	0.44	1.86	0.78	4.32	13.68
Millepora alcicornis	0	1	2.94	5.55	3.95	27.62	Placogorgia spp.	0.27	0.17	1.73	0.78	4.03	17.72
Stephanocoeania intersepta/Siderastrea radians	0	0.9	2.66	2.55	3.57	31.19	Parazonanthidae	0.46	0.39	1.73	0.66	4.03	21.74
Montastraea cavernosa	0.25	1	2.58	2.24	3.46	34.65	Hypnogorgia sp.	0.35	0.39	1.52	0.59	3.55	25.29
Agaricia fragilis	0	0.9	2.57	2.69	3.45	38.1	Ellisella atlantica/elongata	0.19	0.28	1.48	0.77	3.44	28.73
Diploria labyrinthiformis	0	0.9	2.57	2.69	3.45	41.55	Copidaster schismochilus	0	0.28	1.37	0.6	3.18	31.91
Brown fleshy crust	0.17	1	2.56	2.23	3.44	44.98	Creamy-white encrusting sponge	0.19	0.22	1.2	0.67	2.79	34.71
Caulerpa chemnitzia	0.75	0	2.14	1.76	2.88	47.86	Crustose coralline algae	0.65	0.78	1.19	0.59	2.76	37.47
Meandrina meandrites	0	0.7	2.02	1.42	2.72	50.58	Dark green encruster	0.23	0.22	1.09	0.59	2.53	40
Scolymia cubensis	0	0.7	2.02	1.44	2.71	53.29	Ophiuroidea	0.19	0.56	1.09	0.54	2.53	42.53
Caulerpa mexicana	0.5	0	1.84	1.15	2.47	55.77	Asteroidea sp. 2	0.04	0.22	1.07	0.56	2.5	45.02
Caulerpa mexicana	0.5	0	1.84	1.15	2.47	58.24	Viminella sp.	0.15	0.11	0.99	0.53	2.3	47.32
Sporochnus bolleanus	0.75	0	1.84	1.15	2.47	60.72	Antipathes atlantica	0.46	0.28	0.97	0.54	2.25	49.57
Aplysina cauliformis	0	0.6	1.79	1.15	2.4	63.12	Coleopleurus floridanus	0.08	0.33	0.93	0.49	2.17	51.74
Dasya spp.	0.75	0	1.78	1.28	2.4	65.51	Yellow-green encrusting sponge	0.96	0.89	0.93	0.41	2.16	53.9
Eunicea spp.	0.17	0.5	1.6	1.1	2.15	67.67	Lobophora canariensis	0.15	0.22	0.74	0.48	1.72	55.62
Verdigellas peltata	0.58	0.1	1.54	1.12	2.07	69.74	Caryophyllidae	0.12	0.06	0.73	0.46	1.71	57.33
Red sieve encrusting sponge, cf. Phorbas amaranthus	0.5	0	1.54	1.12	2.07	71.81	Nicella sp.	0.12	0.11	0.7	0.47	1.62	58.95
							White fluffy sponge	0.12	0	0.69	0.41	1.61	60.56
Groups 60m & 15m							Hydroid sp. 1	0.19	0	0.67	0.49	1.57	62.13
Average dissimilarity = 81.04							Tanacetipathes hirta	0.08	0.11	0.67	0.47	1.55	63.68
							Madrepora oculata	0.08	0.06	0.67	0.41	1.55	65.22
	Group 60	Group 15					Orange-red encrusting sponge	0.81	0.89	0.66	0.36	1.54	66.77
Species	Av.Abund	Av.Abund	Av.Diss	Diss/SD	Contrib%	Cum.%	Isostichopus badionotus	0.08	0.11	0.65	0.44	1.51	68.28
Orbicella franksi	0	1	2.99	4.6	3.69	3.69	Asteroidea sp. 1	0.08	0.06	0.61	0.34	1.43	69.71
Diploria labyrinthiformis	0	1	2.99	4.6	3.69	7.38	Asteroidea sp. 4	0.04	0.11	0.59	0.38	1.37	71.08
Pseudodiploria strigosa	0	1	2.99	4.6	3.69	11.08
Porites astreoides	0	1	2.99	4.6	3.69	14.77	Groups NNE & PL
Antillogorgia spp.	0	1	2.99	4.6	3.69	18.46	Average dissimilarity = 40.93
Plexaurella spp.	0	1	2.99	4.6	3.69	22.15
Pseudoplexaura spp.	0	1	2.99	4.6	3.69	25.85		Group NNE	Group PL
Aplysina fistularis	0	1	2.99	4.6	3.69	29.54	Species	Av.Abund	Av.Abund	Av.Diss	Diss/SD	Contrib%	Cum.%
Montastraea cavernosa	0.25	1	2.64	2.14	3.25	32.79	Nicella sp.	0.46	0.11	2.47	1.28	6.03	6.03
Brown fleshy crust	0.17	1	2.62	2.13	3.23	36.02	Placogorgia spp.	0.46	0.17	2.23	1.15	5.46	11.49
Palythoa caribaeorum	0	0.9	2.61	2.55	3.22	39.24	Madracis myriaster	0.5	0.33	1.84	0.89	4.51	15.99
Eunicea spp.	0.17	1	2.4	1.75	2.96	42.2	Creamy-white encrusting sponge	0.38	0.22	1.49	0.79	3.65	19.64
Millepora alcicornis	0	0.8	2.25	1.85	2.78	44.98	Dark green encruster	0.25	0.22	1.28	0.7	3.13	22.78
Caulerpa chemnitzia	0.75	0	2.16	1.75	2.66	47.64	Antipathes atlantica	0.29	0.28	1.25	0.64	3.04	25.82
Agaricia fragilis	0	0.7	1.98	1.45	2.44	50.08	Copidaster schismochilus	0.13	0.28	1.23	0.67	3	28.82
Orange-red encrusting sponge	0.92	0.3	1.95	1.33	2.4	52.48	Hypnogorgia sp.	0.46	0.39	1.19	0.59	2.91	31.72
Caulerpa mexicana	0.5	0	1.9	1.12	2.35	54.83	Asteroidea sp. 4	0.21	0.11	1.18	0.67	2.88	34.6
Caulerpa mexicana	0.5	0	1.9	1.12	2.35	57.18	Callogorgia spp.	0.21	0	1.15	0.71	2.81	37.41
Sporochnus bolleanus	0.75	0	1.9	1.12	2.35	59.53	Coleopleurus floridanus	0.04	0.33	1.11	0.59	2.7	40.12
Plexaura homomalla	0	0.6	1.82	1.15	2.24	61.77	Asteroidea sp. 2	0.25	0.22	1.07	0.65	2.62	42.74
Dasya spp.	0.75	0	1.8	1.28	2.23	64	Ellisella atlantica/elongata	0.08	0.28	0.99	0.64	2.43	45.17
Meandrina meandrites	0	0.6	1.68	1.17	2.07	66.07	Yellow encrusting sponge	0.46	0.44	0.98	0.6	2.39	47.55
Stephanocoeania intersepta/Siderastrea radians	0	0.6	1.6	1.2	1.98	68.04	Parazonanthidae	0.38	0.39	0.95	0.57	2.33	49.88
Aplysina cauliformis	0	0.6	1.6	1.2	1.98	70.02	Distichopathes filix	0.46	0.44	0.85	0.46	2.09	51.97
							Purple encruster	0.13	0.11	0.73	0.51	1.78	53.75
Groups 30m & 15m							Caryophyllidae	0.08	0.06	0.71	0.45	1.75	55.5
Average dissimilarity = 23.98							Codium sp.	0.25	0.06	0.65	0.52	1.6	57.09
							Green filamentous algae	0.04	0.22	0.63	0.52	1.54	58.64
	Group 30	Group 15					Isostichopus badionotus	0.04	0.11	0.63	0.43	1.53	60.17
Species	Av.Abund	Av.Abund	Av.Diss	Diss/SD	Contrib%	Cum.%	Antipathes furcata	0.08	0.22	0.6	0.45	1.46	61.63
Pseudoplexaura spp.	0	1	2.32	9.92	9.67	9.67	Crustose coralline algae	0.83	0.78	0.56	0.4	1.37	63.01
Orange-red encrusting sponge	1	0.3	1.64	1.51	6.83	16.5	Orange-red encrusting sponge	0.92	0.89	0.53	0.34	1.3	64.31
Scolymia cubensis	0.7	0	1.62	1.51	6.74	23.23	Yellow-green encrusting sponge	1	0.89	0.53	0.34	1.3	65.61
Plexaurella spp.	0.3	1	1.58	1.32	6.57	29.8	Chrysogorgia sp.	0.08	0	0.52	0.37	1.26	66.87
Aplysina cauliformis	0.6	0.6	1.45	1.23	6.05	35.86	Tanacetipathes hirta	0.17	0.11	0.51	0.42	1.25	68.12
Lobophora canariensis	1	0.4	1.44	1.23	6.02	41.88	Peyssonnelia spp.	0.17	0.06	0.51	0.46	1.24	69.36
Plexaura homomalla	0.4	0.6	1.37	1.17	5.73	47.61	Membranous red blades	0.21	0.11	0.51	0.46	1.24	70.6
Cerithium sp.	0.5	0.2	1.21	1.04	5.03	52.64
Eunicea spp.	0.5	1	1.14	0.92	4.77	57.41	Groups SP & TIG
Madracis spp.	1	0.5	1.12	0.92	4.66	62.07	Average dissimilarity = 33.60
Meandrina meandrites	0.7	0.6	1.11	0.92	4.63	66.69
Palythoa caribaeorum	0.5	0.9	1.06	0.87	4.41	71.11		Group SP	Group TIG
							Species	Av.Abund	Av.Abund	Av.Diss	Diss/SD	Contrib%	Cum.%
Groups 60m & 90m							Creamy-white encrusting sponge	0.19	0.26	1.32	0.67	3.92	3.92
Average dissimilarity = 52.42							Crustose coralline algae	0.65	0.91	1.2	0.6	3.56	7.48
							Tanacetipathes tanacetum	0.31	0.43	1.19	0.62	3.54	11.02
	Group 60	Group 90					Antipathes atlantica	0.46	0.39	1.16	0.58	3.45	14.47
Species	Av.Abund	Av.Abund	Av.Diss	Diss/SD	Contrib%	Cum.%	Distichopathes filix	0.23	0.3	0.92	0.52	2.73	17.2
Antipathes atlantica	0.17	1	2.66	1.8	5.07	5.07	Lobophora canariensis	0.15	0.39	0.87	0.52	2.59	19.79
Ellisella atlantica/elongata	0	0.73	2.38	1.45	4.54	9.61	Nicella sp.	0.12	0.17	0.86	0.51	2.55	22.34
Galaxaura sp.	0	0.55	1.8	0.99	3.44	13.05	Placogorgia spp.	0.27	0.35	0.82	0.46	2.45	24.79
Caulerpa mexicana	0.5	0	1.77	0.99	3.38	16.43	Light-green encrusting sponge	0	0.22	0.81	0.48	2.41	27.2
Caulerpa mexicana	0.5	0	1.77	0.99	3.38	19.81	Parazonanthidae	0.46	0.3	0.75	0.45	2.24	29.44
Caulerpa chemnitzia	0.75	0.27	1.75	1.07	3.34	23.15	Ophiuroidea	0.19	0.17	0.7	0.44	2.08	31.52
Membranous red blades	0.5	0.64	1.7	0.96	3.24	26.39	Dark green encruster	0.23	0.09	0.67	0.44	1.99	33.51
Cladophora sp.	0.5	0.82	1.69	1	3.22	29.6	Antipathes furcata	0.23	0.04	0.67	0.51	1.99	35.5
Leptogorgia sp.	0	0.55	1.67	1.01	3.18	32.78	Peyssonnelia spp.	0.08	0.13	0.66	0.46	1.96	37.46
Ellisella grandis	0	0.55	1.66	1.03	3.17	35.95	Orange-red encrusting sponge	0.81	0.83	0.65	0.39	1.93	39.39
Hydroid sp. 1	0.25	0.73	1.63	0.93	3.1	39.06	Aplysina cauliformis	0.08	0.22	0.64	0.6	1.9	41.29
Peyssonnelia spp.	0.33	0.36	1.57	0.97	3	42.06	Asteroidea sp. 4	0.04	0.09	0.62	0.4	1.83	43.13
Antipathes furcata	0	0.45	1.55	0.84	2.96	45.01	Yellow encrusting sponge	0.35	0.39	0.6	0.37	1.77	44.9
Tanacetipathes tanacetum	0.25	0.73	1.49	0.84	2.85	47.86	Caulerpa mexicana	0.12	0	0.58	0.36	1.71	46.61
Stichopathes spp.	0.08	0.55	1.48	0.85	2.83	50.7	Caulerpa mexicana	0.12	0	0.58	0.36	1.71	48.33
Green filamentous algae	0.58	0.55	1.48	0.79	2.83	53.52	Sporochnus bolleanus	0.23	0.13	0.58	0.36	1.71	50.04
Red sieve encrusting sponge, cf. Phorbas amaranthus	0.5	0	1.45	0.99	2.78	56.3	Cerithium sp.	0.04	0.26	0.57	0.45	1.69	51.73
Dasya spp.	0.75	0.45	1.42	0.77	2.71	59.01	Caryophyllidae	0.12	0.09	0.54	0.4	1.62	53.35
White-brown encrusting sponge	0.17	0.45	1.4	0.89	2.67	61.68	Dasya spp.	0.15	0.04	0.54	0.4	1.6	54.95
Tanacetipathes hirta	0	0.45	1.37	0.85	2.61	64.29	Green filamentous algae	0.19	0.13	0.52	0.38	1.56	56.51
Dictyopteris spp. /Dictyota spp.	0.67	1	1.32	0.7	2.51	66.8	Verdigellas peltata	0.08	0.13	0.49	0.4	1.47	57.98
Verdigellas peltata	0.58	0.55	1.15	0.68	2.19	68.99	Cladophora sp.	0.12	0.17	0.48	0.36	1.44	59.42
Sporochnus bolleanus	0.75	0.91	1.12	0.74	2.13	71.12	Viminella sp.	0.15	0.09	0.48	0.37	1.43	60.86
							Membranous red blades	0.15	0.09	0.48	0.4	1.43	62.28
Groups 30m & 90m							Chironephthya	0.08	0	0.44	0.35	1.3	63.58
Average dissimilarity = 78.09							Hydroid sp. 1	0.19	0.13	0.42	0.34	1.26	64.84
							Agaricia fragilis	0.12	0.35	0.41	0.45	1.23	66.07
	Group 30	Group 90					Stephanocoeania intersepta/Siderastrea radians	0.12	0.35	0.41	0.45	1.21	67.28
Species	Av.Abund	Av.Abund	Av.Diss	Diss/SD	Contrib%	Cum.%	Aspagaropsis taxiformis	0.12	0	0.41	0.45	1.21	68.49
Madracis spp.	1	0	2.45	9.02	3.13	3.13	Eunicea spp.	0.19	0.3	0.4	0.39	1.18	69.67
Orbicella franksi	1	0	2.45	9.02	3.13	6.26	Red sieve encrusting sponge, cf. Phorbas amaranthus	0	0.09	0.39	0.29	1.16	70.83
Montastraea cavernosa	1	0	2.45	9.02	3.13	9.39
Pseudodiploria strigosa	1	0	2.45	9.02	3.13	12.53	Groups NNE & TIG
Porites astreoides	1	0	2.45	9.02	3.13	15.66	Average dissimilarity = 29.00
Antipathes atlantica	0	1	2.45	9.02	3.13	18.79
Antillogorgia spp.	1	0	2.45	9.02	3.13	21.92		Group NNE	Group TIG
Sporochnus bolleanus	0	0.91	2.45	9.02	3.13	25.05	Species	Av.Abund	Av.Abund	Av.Diss	Diss/SD	Contrib%	Cum.%
Brown fleshy crust	1	0	2.45	9.02	3.13	28.18	Tanacetipathes tanacetum	0.17	0.43	1.04	0.71	3.58	3.58
Aplysina fistularis	1	0	2.45	9.02	3.13	31.32	Antipathes atlantica	0.29	0.39	1.02	0.65	3.5	7.08
Millepora alcicornis	1	0	2.45	9.02	3.13	34.45	Callogorgia spp.	0.21	0.04	0.95	0.63	3.29	10.37
Stephanocoeania intersepta/Siderastrea radians	0.9	0	2.22	2.79	2.84	37.28	Asteroidea sp. 2	0.25	0.04	0.95	0.61	3.26	13.63
Ellisella atlantica/elongata	0	0.73	2.21	2.78	2.84	40.12	Ophiuroidea	0.38	0.17	0.86	0.57	2.95	16.58
Agaricia fragilis	0.9	0	2.15	2.82	2.76	42.88	Asteroidea sp. 4	0.21	0.09	0.83	0.57	2.85	19.43
Diploria labyrinthiformis	0.9	0	2.15	2.82	2.76	45.64	Dark green encruster	0.25	0.09	0.8	0.55	2.74	22.17
Hydroid sp. 1	0	0.73	2.11	2.39	2.71	48.34	Nicella sp.	0.46	0.17	0.77	0.53	2.65	24.82
Tanacetipathes tanacetum	0	0.73	1.92	1.91	2.46	50.81	Parazonanthidae	0.38	0.3	0.68	0.49	2.33	27.16
Cladophora sp.	0	0.82	1.87	1.74	2.39	53.2	Codium sp.	0.25	0	0.66	0.53	2.27	29.42
Membranous red blades	0	0.64	1.84	1.74	2.35	55.55	Purple encruster	0.13	0.09	0.64	0.49	2.19	31.61
Stichopathes spp.	0	0.55	1.69	1.47	2.17	57.72	Cerithium sp.	0.04	0.26	0.62	0.56	2.13	33.75
Scolymia cubensis	0.7	0	1.69	1.48	2.17	59.88	Copidaster schismochilus	0.13	0	0.57	0.46	1.96	35.7
Meandrina meandrites	0.7	0	1.69	1.47	2.16	62.05	Peyssonnelia spp.	0.17	0.13	0.57	0.51	1.95	37.65
Ellisella grandis	0	0.55	1.66	1.47	2.13	64.18	Verdigellas peltata	0.25	0.13	0.53	0.47	1.81	39.46
Aplysina cauliformis	0.6	0	1.47	1.18	1.88	66.06	Dasya spp.	0.25	0.04	0.52	0.47	1.8	41.26
Lobophora canariensis	1	0.45	1.44	1.11	1.85	67.91	Plexaura homomalla	0.08	0.26	0.51	0.54	1.74	43
Verdigellas peltata	0.1	0.55	1.34	1.11	1.72	69.63	Udotea cyanthiformis	0.17	0	0.5	0.43	1.71	44.72
Tanacetipathes hirta	0	0.45	1.34	1.11	1.71	71.34	Distichopathes filix	0.46	0.3	0.48	0.4	1.67	46.39
							Creamy-white encrusting sponge	0.38	0.26	0.45	0.38	1.56	47.95
Groups 15m & 90m							Caryophyllidae	0.08	0.09	0.44	0.42	1.52	49.47
Average dissimilarity = 82.95							Light-green encrusting sponge	0.04	0.22	0.44	0.41	1.51	50.98
							Viminella sp.	0.04	0.09	0.44	0.39	1.51	52.49
	Group 15	Group 90					Ellisella atlantica/elongata	0.08	0.22	0.43	0.44	1.49	53.99
Species	Av.Abund	Av.Abund	Av.Diss	Diss/SD	Contrib%	Cum.%	Tanacetipathes hirta	0.17	0.09	0.43	0.39	1.47	55.45
Orbicella franksi	1	0	2.48	7.44	2.99	2.99	Antipathes furcata	0.08	0.04	0.42	0.41	1.45	56.9
Montastraea cavernosa	1	0	2.48	7.44	2.99	5.97	Chrysogorgia sp.	0.08	0.04	0.39	0.35	1.35	58.25
Diploria labyrinthiformis	1	0	2.48	7.44	2.99	8.96	Caulerpa mexicana	0.13	0	0.39	0.36	1.34	59.59
Pseudodiploria strigosa	1	0	2.48	7.44	2.99	11.94	Caulerpa mexicana	0.13	0	0.39	0.36	1.34	60.94
Porites astreoides	1	0	2.48	7.44	2.99	14.93	Sporochnus bolleanus	0.25	0.13	0.39	0.36	1.34	62.28
Antipathes atlantica	0	1	2.48	7.44	2.99	17.91	Crustose coralline algae	0.83	0.91	0.38	0.33	1.32	63.6
Antillogorgia spp.	1	0	2.48	7.44	2.99	20.9	Orange-red encrusting sponge	0.92	0.83	0.38	0.36	1.31	64.91
Eunicea spp.	1	0	2.48	7.44	2.99	23.88	Chladophoropsis macromeres	0.17	0.09	0.38	0.41	1.29	66.2
Plexaurella spp.	1	0	2.48	7.44	2.99	26.87	Aplysina cauliformis	0.21	0.22	0.37	0.44	1.29	67.49
Pseudoplexaura spp.	1	0	2.48	7.44	2.99	29.85	Lobophora canariensis	0.46	0.39	0.37	0.44	1.27	68.76
Sporochnus bolleanus	0	0.91	2.48	7.44	2.99	32.84	Green filamentous algae	0.04	0.13	0.37	0.37	1.26	70.02
Brown fleshy crust	1	0	2.48	7.44	2.99	35.82
Aplysina fistularis	1	0	2.48	7.44	2.99	38.81	Groups PL & TIG
Ellisella atlantica/elongata	0	0.73	2.25	2.71	2.71	41.52	Average dissimilarity = 40.93
Palythoa caribaeorum	0.9	0	2.18	2.76	2.62	44.14
Hydroid sp. 1	0	0.73	2.15	2.34	2.59	46.73		Group PL	Group TIG
Tanacetipathes tanacetum	0	0.73	1.94	1.89	2.34	49.07	Species	Av.Abund	Av.Abund	Av.Diss	Diss/SD	Contrib%	Cum.%
Millepora alcicornis	0.8	0	1.89	1.91	2.28	51.35	Placogorgia spp.	0.17	0.35	2.12	1.04	5.18	5.18
Cladophora sp.	0	0.82	1.88	1.72	2.27	53.62	Madracis myriaster	0.33	0.39	1.86	0.92	4.56	9.74
Membranous red blades	0	0.64	1.85	1.72	2.23	55.85	Tanacetipathes tanacetum	0.22	0.43	1.66	0.97	4.06	13.79
Orange-red encrusting sponge	0.3	1	1.73	1.47	2.09	57.95	Ellisella atlantica/elongata	0.28	0.22	1.61	0.9	3.92	17.72
Stichopathes spp.	0	0.55	1.72	1.46	2.07	60.01	Yellow encrusting sponge	0.44	0.39	1.39	0.69	3.41	21.12
Agaricia fragilis	0.7	0	1.67	1.48	2.01	62.03	Creamy-white encrusting sponge	0.22	0.26	1.39	0.72	3.38	24.51
Ellisella grandis	0	0.55	1.67	1.47	2.01	64.04	Asteroidea sp. 2	0.22	0.04	1.29	0.65	3.15	27.66
Plexaura homomalla	0.6	0	1.52	1.19	1.83	65.87	Nicella sp.	0.11	0.17	1.28	0.69	3.13	30.79
Meandrina meandrites	0.6	0	1.4	1.18	1.69	67.56	Copidaster schismochilus	0.28	0	1.26	0.66	3.08	33.88
Stephanocoeania intersepta/Siderastrea radians	0.6	0	1.37	1.2	1.65	69.21	Antipathes atlantica	0.28	0.39	1.25	0.72	3.06	36.93
Aplysina cauliformis	0.6	0	1.37	1.2	1.65	70.87	Ophiuroidea	0.56	0.17	1.19	0.63	2.91	39.84
							Parazonanthidae	0.39	0.3	0.93	0.53	2.27	42.11
Groups 60m & 150m							Madrepora oculata	0.06	0.09	0.91	0.56	2.22	44.33
Average dissimilarity = 80.30							Viminella sp.	0.11	0.09	0.87	0.53	2.14	46.46
							Purple encruster	0.11	0.09	0.86	0.57	2.11	48.58
	Group 60	Group 150					Asteroidea sp. 4	0.11	0.09	0.86	0.53	2.1	50.68
Species	Av.Abund	Av.Abund	Av.Diss	Diss/SD	Contrib%	Cum.%	Distichopathes filix	0.44	0.3	0.86	0.5	2.1	52.77
Stichopathes spp.	0.08	1	3.87	3.11	4.82	4.82	Light-green encrusting sponge	0.06	0.22	0.83	0.57	2.02	54.79
Tanacetipathes tanacetum	0.25	1	3.6	2.27	4.48	9.3	Dark green encruster	0.22	0.09	0.81	0.54	1.98	56.77
Sporochnus bolleanus	0.75	0	3.6	2.27	4.48	13.78	Sporochnus bolleanus	0.22	0.13	0.8	0.57	1.96	58.73
Antipathes atlantica	0.17	0.9	3.36	1.84	4.18	17.96	Caryophyllidae	0.06	0.09	0.79	0.49	1.93	60.66
Dark green encruster	0	0.8	3.3	1.71	4.11	22.07	Antipathes furcata	0.22	0.04	0.69	0.5	1.69	62.35
Yellow encrusting sponge	0	0.7	2.86	1.36	3.56	25.63	Membranous red blades	0.11	0.09	0.67	0.5	1.64	63.99
Parazonanthidae	0	0.7	2.79	1.35	3.47	29.1	Crustose coralline algae	0.78	0.91	0.64	0.4	1.57	65.56
Dasya spp.	0.75	0	2.74	1.75	3.42	32.52	Hypnogorgia sp.	0.39	0.35	0.63	0.4	1.55	67.11
Caulerpa mexicana	0.5	0	2.59	1.11	3.23	35.74	Red filamentous algae	0.17	0	0.63	0.47	1.53	68.64
Caulerpa mexicana	0.5	0	2.59	1.11	3.23	38.97	White-brown encrusting sponge	0.17	0.13	0.62	0.47	1.52	70.16
Creamy-white encrusting sponge	0	0.6	2.57	1.11	3.2	42.17
Caulerpa chemnitzia	0.75	0	2.52	1.48	3.14	45.32
Green filamentous algae	0.58	0	2.49	1.48	3.11	48.42
Antipathes furcata	0	0.6	2.34	1.12	2.92	51.34
Membranous red blades	0.5	0	2.15	1.19	2.68	54.02
Dictyopteris spp. /Dictyota spp.	0.67	0	2.1	1.19	2.61	56.62
Placogorgia spp.	0	0.5	2.02	0.94	2.52	59.14
Viminella sp.	0	0.5	1.98	0.93	2.46	61.61
Cladophora sp.	0.5	0	1.85	1.04	2.3	63.91
Lobophora canariensis	0.75	0	1.79	0.97	2.22	66.13
Verdigellas peltata	0.58	0	1.73	0.98	2.16	68.29
Nicella sp.	0	0.4	1.59	0.76	1.98	70.27
Groups 30m & 150m
Average dissimilarity = 82.16
	Group 30	Group 150
Species	Av.Abund	Av.Abund	Av.Diss	Diss/SD	Contrib%	Cum.%
Madracis spp.	1	0	2.97	13.11	3.62	3.62
Orbicella franksi	1	0	2.97	13.11	3.62	7.24
Montastraea cavernosa	1	0	2.97	13.11	3.62	10.86
Pseudodiploria strigosa	1	0	2.97	13.11	3.62	14.48
Porites astreoides	1	0	2.97	13.11	3.62	18.1
Stichopathes spp.	0	1	2.97	13.11	3.62	21.72
Tanacetipathes tanacetum	0	1	2.97	13.11	3.62	25.34
Antillogorgia spp.	1	0	2.97	13.11	3.62	28.96
Dictyopteris spp. /Dictyota spp.	1	0	2.97	13.11	3.62	32.57
Lobophora canariensis	1	0	2.97	13.11	3.62	36.19
Brown fleshy crust	1	0	2.97	13.11	3.62	39.81
Aplysina fistularis	1	0	2.97	13.11	3.62	43.43
Millepora alcicornis	1	0	2.97	13.11	3.62	47.05
Stephanocoeania intersepta/Siderastrea radians	0.9	0	2.83	4.23	3.44	50.49
Dark green encruster	0	0.8	2.61	2.43	3.18	53.68
Yellow encrusting sponge	0	0.7	2.56	2.41	3.12	56.79
Antipathes atlantica	0	0.9	2.55	2.41	3.1	59.89
Agaricia fragilis	0.9	0	2.26	1.78	2.75	62.65
Diploria labyrinthiformis	0.9	0	2.26	1.78	2.75	65.4
Parazonanthidae	0	0.7	2.03	1.41	2.47	67.86
Creamy-white encrusting sponge	0	0.6	2.02	1.42	2.46	70.32
Groups 15m & 150m
Average dissimilarity = 87.05
	Group 15	Group 150
Species	Av.Abund	Av.Abund	Av.Diss	Diss/SD	Contrib%	Cum.%
Orbicella franksi	1	0	3.08	13.56	3.54	3.54
Montastraea cavernosa	1	0	3.08	13.56	3.54	7.09
Diploria labyrinthiformis	1	0	3.08	13.56	3.54	10.63
Pseudodiploria strigosa	1	0	3.08	13.56	3.54	14.17
Porites astreoides	1	0	3.08	13.56	3.54	17.71
Stichopathes spp.	0	1	3.08	13.56	3.54	21.26
Tanacetipathes tanacetum	0	1	3.08	13.56	3.54	24.8
Antillogorgia spp.	1	0	3.08	13.56	3.54	28.34
Eunicea spp.	1	0	3.08	13.56	3.54	31.89
Plexaurella spp.	1	0	3.08	13.56	3.54	35.43
Pseudoplexaura spp.	1	0	3.08	13.56	3.54	38.97
Dictyopteris spp. /Dictyota spp.	1	0	3.08	13.56	3.54	42.51
Brown fleshy crust	1	0	3.08	13.56	3.54	46.06
Aplysina fistularis	1	0	3.08	13.56	3.54	49.6
Dark green encruster	0	0.8	2.71	2.42	3.11	52.71
Antipathes atlantica	0	0.9	2.67	2.41	3.07	55.77
Yellow encrusting sponge	0	0.7	2.64	2.41	3.04	58.81
Palythoa caribaeorum	0.9	0	2.35	1.79	2.7	61.51
Aspagaropsis taxiformis	0.3	0	2.14	1.42	2.46	63.97
Creamy-white encrusting sponge	0	0.6	2.14	1.42	2.46	66.43
Parazonanthidae	0	0.7	2.12	1.42	2.43	68.86
Orange-red encrusting sponge	0.3	1	2.09	1.42	2.4	71.26
Groups 90m & 150m
Average dissimilarity = 60.73
	Group 90	Group 150
Species	Av.Abund	Av.Abund	Av.Diss	Diss/SD	Contrib%	Cum.%
Dictyopteris spp. /Dictyota spp.	1	0	3.38	7.82	5.57	5.57
Sporochnus bolleanus	0.91	0	3.01	2.58	4.96	10.53
Dark green encruster	0	0.8	2.77	1.99	4.56	15.09
Cladophora sp.	0.82	0	2.64	1.76	4.35	19.44
Parazonanthidae	0.09	0.7	2.45	1.61	4.03	23.48
Yellow encrusting sponge	0	0.7	2.42	1.63	3.99	27.46
Galaxaura sp.	0.55	0	2.42	1.63	3.98	31.44
Green filamentous algae	0.55	0	2.41	1.63	3.98	35.42
Hydroid sp. 1	0.73	0	2.4	1.63	3.96	39.38
Ellisella atlantica/elongata	0.73	0.4	2.28	1.36	3.76	43.13
Creamy-white encrusting sponge	0	0.6	2.14	1.26	3.52	46.65
Leptogorgia sp.	0.55	0	1.79	0.99	2.94	49.6
Membranous red blades	0.64	0	1.78	1.09	2.93	52.53
Placogorgia spp.	0	0.5	1.72	1.01	2.84	55.37
Stichopathes spp.	0.55	1	1.7	0.93	2.79	58.17
Viminella sp.	0	0.5	1.68	1	2.76	60.92
Tanacetipathes hirta	0.45	0.4	1.64	0.93	2.7	63.63
Dasya spp.	0.45	0	1.54	0.94	2.54	66.17
Verdigellas peltata	0.55	0	1.43	0.87	2.36	68.53
Nicella sp.	0	0.4	1.33	0.81	2.19	70.72
Groups 60m & 200m
Average dissimilarity = 79.26
	Group 60	Group 200
Species	Av.Abund	Av.Abund	Av.Diss	Diss/SD	Contrib%	Cum.%
Hypnogorgia sp.	0	0.94	3.52	2.52	4.44	4.44
Stichopathes spp.	0.08	1	3.34	2.07	4.21	8.65
Madracis myriaster	0	0.89	3.32	2.05	4.19	12.84
Parazonanthidae	0	0.89	3.32	2.08	4.19	17.04
Lobophora canariensis	0.75	0	2.85	2.09	3.6	20.64
Yellow encrusting sponge	0	0.78	2.8	1.65	3.53	24.17
Caulerpa chemnitzia	0.75	0	2.64	1.67	3.33	27.5
Dasya spp.	0.75	0	2.52	1.53	3.18	30.68
Sporochnus bolleanus	0.75	0	2.5	1.21	3.16	33.83
Distichopathes filix	0	0.72	2.42	1.54	3.06	36.89
Placogorgia spp.	0	0.67	2.39	1.28	3.02	39.91
Dictyopteris spp. /Dictyota spp.	0.67	0	2.36	1.42	2.98	42.89
Ophiuroidea	0	0.67	2.33	1.33	2.95	45.83
Green filamentous algae	0.58	0	2.05	1.08	2.58	48.42
Verdigellas peltata	0.58	0	1.96	1.17	2.48	50.89
Red sieve encrusting sponge, cf. Phorbas amaranthus	0.5	0	1.92	1.12	2.42	53.32
Cladophora sp.	0.5	0	1.8	0.98	2.27	55.59
Creamy-white encrusting sponge	0	0.56	1.78	1.09	2.25	57.84
Caulerpa mexicana	0.5	0	1.72	0.78	2.17	60.01
Caulerpa mexicana	0.5	0	1.72	0.78	2.17	62.18
Antipathes atlantica	0.17	0.33	1.57	0.77	1.98	64.16
Membranous red blades	0.5	0	1.56	0.87	1.97	66.13
Light-green encrusting sponge	0.33	0	1.5	0.83	1.9	68.03
Nicella sp.	0	0.44	1.44	0.87	1.82	69.85
Dark green encruster	0	0.39	1.38	0.73	1.75	71.59
Groups 30m & 200m
Average dissimilarity = 85.15
	Group 30	Group 200
Species	Av.Abund	Av.Abund	Av.Diss	Diss/SD	Contrib%	Cum.%
Madracis myriaster	0	0.89	2.78	7.59	3.26	3.26
Madracis spp.	1	0	2.78	7.59	3.26	6.53
Orbicella franksi	1	0	2.78	7.59	3.26	9.79
Montastraea cavernosa	1	0	2.78	7.59	3.26	13.05
Pseudodiploria strigosa	1	0	2.78	7.59	3.26	16.31
Porites astreoides	1	0	2.78	7.59	3.26	19.58
Stichopathes spp.	0	1	2.78	7.59	3.26	22.84
Antillogorgia spp.	1	0	2.78	7.59	3.26	26.1
Hypnogorgia sp.	0	0.94	2.78	7.59	3.26	29.36
Dictyopteris spp. /Dictyota spp.	1	0	2.78	7.59	3.26	32.63
Lobophora canariensis	1	0	2.78	7.59	3.26	35.89
Brown fleshy crust	1	0	2.78	7.59	3.26	39.15
Aplysina fistularis	1	0	2.78	7.59	3.26	42.41
Millepora alcicornis	1	0	2.78	7.59	3.26	45.68
Agaricia fragilis	0.9	0	2.56	3.48	3.01	48.68
Diploria labyrinthiformis	0.9	0	2.56	3.48	3.01	51.69
Stephanocoeania intersepta/Siderastrea radians	0.9	0	2.5	2.67	2.93	54.62
Yellow encrusting sponge	0	0.78	2.38	2.49	2.8	57.42
Parazonanthidae	0	0.89	2.36	2.26	2.77	60.19
Placogorgia spp.	0	0.67	2.32	2.29	2.72	62.91
Scolymia cubensis	0.7	0	1.95	1.5	2.29	65.2
Meandrina meandrites	0.7	0	1.93	1.5	2.27	67.47
Distichopathes filix	0	0.72	1.7	1.32	1.99	69.46
Creamy-white encrusting sponge	0	0.56	1.67	1.32	1.96	71.43
Groups 15m & 200m
Average dissimilarity = 88.83
	Group 15	Group 200
Species	Av.Abund	Av.Abund	Av.Diss	Diss/SD	Contrib%	Cum.%
Madracis myriaster	0	0.89	2.8	6.44	3.15	3.15
Orbicella franksi	1	0	2.8	6.44	3.15	6.3
Montastraea cavernosa	1	0	2.8	6.44	3.15	9.44
Diploria labyrinthiformis	1	0	2.8	6.44	3.15	12.59
Pseudodiploria strigosa	1	0	2.8	6.44	3.15	15.74
Porites astreoides	1	0	2.8	6.44	3.15	18.89
Stichopathes spp.	0	1	2.8	6.44	3.15	22.03
Antillogorgia spp.	1	0	2.8	6.44	3.15	25.18
Eunicea spp.	1	0	2.8	6.44	3.15	28.33
Hypnogorgia sp.	0	0.94	2.8	6.44	3.15	31.48
Plexaurella spp.	1	0	2.8	6.44	3.15	34.62
Pseudoplexaura spp.	1	0	2.8	6.44	3.15	37.77
Dictyopteris spp. /Dictyota spp.	1	0	2.8	6.44	3.15	40.92
Brown fleshy crust	1	0	2.8	6.44	3.15	44.07
Aplysina fistularis	1	0	2.8	6.44	3.15	47.21
Palythoa caribaeorum	0.9	0	2.57	3.36	2.89	50.11
Yellow encrusting sponge	0	0.78	2.39	2.46	2.69	52.79
Parazonanthidae	0	0.89	2.38	2.21	2.68	55.47
Millepora alcicornis	0.8	0	2.36	2.47	2.65	58.13
Placogorgia spp.	0	0.67	2.32	2.27	2.61	60.74
Agaricia fragilis	0.7	0	2.09	1.76	2.35	63.09
Stephanocoeania intersepta/Siderastrea radians	0.6	0	1.86	1.52	2.09	65.18
Aplysina cauliformis	0.6	0	1.86	1.52	2.09	67.27
Orange-red encrusting sponge	0.3	0.94	1.85	1.36	2.09	69.36
Plexaura homomalla	0.6	0	1.77	1.24	1.99	71.35
Groups 90m & 200m
Average dissimilarity = 73.42
	Group 90	Group 200
Species	Av.Abund	Av.Abund	Av.Diss	Diss/SD	Contrib%	Cum.%
Dictyopteris spp. /Dictyota spp.	1	0	3.15	4.38	4.29	4.29
Hypnogorgia sp.	0	0.94	2.97	3.34	4.05	8.34
Sporochnus bolleanus	0.91	0	2.88	2.59	3.92	12.26
Madracis myriaster	0.27	0.89	2.64	1.91	3.59	15.85
Parazonanthidae	0.09	0.89	2.58	1.76	3.52	19.37
Cladophora sp.	0.82	0	2.58	1.84	3.52	22.88
Yellow encrusting sponge	0	0.78	2.4	1.82	3.27	26.15
Hydroid sp. 1	0.73	0	2.12	1.49	2.88	29.04
Distichopathes filix	0	0.72	2.1	1.37	2.86	31.9
Antipathes atlantica	1	0.33	2.09	1.23	2.85	34.75
Ellisella atlantica/elongata	0.73	0.17	2.08	1.31	2.83	37.59
Placogorgia spp.	0	0.67	2.07	1.5	2.81	40.4
Ophiuroidea	0	0.67	2	1.22	2.73	43.13
Membranous red blades	0.64	0	1.89	1.31	2.58	45.7
Tanacetipathes tanacetum	0.73	0.22	1.82	1.04	2.47	48.18
Ellisella grandis	0.55	0	1.81	1.21	2.46	50.64
White-brown encrusting sponge	0.45	0	1.63	1.05	2.22	52.86
Leptogorgia sp.	0.55	0	1.61	0.95	2.19	55.05
Verdigellas peltata	0.55	0	1.61	1.07	2.19	57.24
Creamy-white encrusting sponge	0	0.56	1.57	1.13	2.14	59.38
Green filamentous algae	0.55	0	1.51	0.91	2.05	61.43
Galaxaura sp.	0.55	0	1.43	0.87	1.95	63.38
Lobophora canariensis	0.45	0	1.4	0.96	1.91	65.29
Stichopathes spp.	0.55	1	1.4	0.8	1.9	67.19
Tanacetipathes hirta	0.45	0.06	1.39	0.92	1.89	69.08
Antipathes furcata	0.45	0.11	1.38	0.84	1.87	70.96
Groups 150m & 200m
Average dissimilarity = 46.08
	Group 150	Group 200
Species	Av.Abund	Av.Abund	Av.Diss	Diss/SD	Contrib%	Cum.%
Hypnogorgia sp.	0.1	0.94	3.47	2.39	7.52	7.52
Tanacetipathes tanacetum	1	0.22	3.22	1.84	7	14.52
Creamy-white encrusting sponge	0.6	0.56	3.02	1.71	6.55	21.07
Madracis myriaster	0.1	0.89	2.69	1.42	5.83	26.9
Antipathes atlantica	0.9	0.33	2.5	1.19	5.42	32.32
Ophiuroidea	0	0.67	2.44	1.27	5.3	37.62
Antipathes furcata	0.6	0.11	2.42	1.2	5.25	42.86
Dark green encruster	0.8	0.39	2.17	1.02	4.7	47.57
Viminella sp.	0.5	0.17	2.12	1.08	4.61	52.18
Nicella sp.	0.4	0.44	2.11	1.08	4.58	56.76
Distichopathes filix	0.3	0.72	1.81	0.93	3.92	60.67
Placogorgia spp.	0.5	0.67	1.79	0.88	3.87	64.55
Ellisella atlantica/elongata	0.4	0.17	1.51	0.79	3.27	67.82
Tanacetipathes hirta	0.4	0.06	1.47	0.79	3.19	71
Groups 60m & 300m
Average dissimilarity = 90.54
	Group 60	Group 300
Species	Av.Abund	Av.Abund	Av.Diss	Diss/SD	Contrib%	Cum.%
Stichopathes spp.	0.08	1	4.44	2.89	4.9	4.9
Sporochnus bolleanus	0.75	0	4.44	2.89	4.9	9.81
Ophiuroidea	0	1	4.44	2.89	4.9	14.71
Dasya spp.	0.75	0	3.54	2.5	3.91	18.62
Crustose coralline algae	0.92	0.11	3.19	1.76	3.52	22.14
Yellow encrusting sponge	0	0.78	3.17	1.63	3.5	25.64
Coleopleurus floridanus	0	0.67	3.16	1.2	3.49	29.13
Caulerpa chemnitzia	0.75	0	3.01	1.74	3.32	32.45
Madracis myriaster	0	0.67	2.96	1.13	3.27	35.72
Hypnogorgia sp.	0	0.67	2.96	1.13	3.27	38.99
Caulerpa mexicana	0.5	0	2.96	1.13	3.27	42.26
Caulerpa mexicana	0.5	0	2.96	1.13	3.27	45.53
Membranous red blades	0.5	0	2.7	1.34	2.98	48.52
Dictyopteris spp. /Dictyota spp.	0.67	0	2.66	1.34	2.93	51.45
Lobophora canariensis	0.75	0	2.57	1.34	2.83	54.29
Verdigellas peltata	0.58	0	2.49	1.35	2.75	57.04
Green filamentous algae	0.58	0	2.45	1.09	2.7	59.74
Distichopathes filix	0	0.56	2.23	0.98	2.46	62.2
Parazonanthidae	0	0.44	2.22	0.77	2.45	64.66
Placogorgia spp.	0	0.56	2.1	1.03	2.32	66.97
Orange-red encrusting sponge	0.92	0.56	1.93	0.8	2.13	69.11
Cladophora sp.	0.5	0	1.93	0.87	2.13	71.24
Groups 30m & 300m
Average dissimilarity = 89.09
	Group 30	Group 300
Species	Av.Abund	Av.Abund	Av.Diss	Diss/SD	Contrib%	Cum.%
Madracis myriaster	0	0.67	3.09	7.68	3.47	3.47
Madracis spp.	1	0	3.09	7.68	3.47	6.94
Orbicella franksi	1	0	3.09	7.68	3.47	10.41
Montastraea cavernosa	1	0	3.09	7.68	3.47	13.88
Pseudodiploria strigosa	1	0	3.09	7.68	3.47	17.36
Porites astreoides	1	0	3.09	7.68	3.47	20.83
Stichopathes spp.	0	1	3.09	7.68	3.47	24.3
Antillogorgia spp.	1	0	3.09	7.68	3.47	27.77
Hypnogorgia sp.	0	0.67	3.09	7.68	3.47	31.24
Dictyopteris spp. /Dictyota spp.	1	0	3.09	7.68	3.47	34.71
Lobophora canariensis	1	0	3.09	7.68	3.47	38.18
Brown fleshy crust	1	0	3.09	7.68	3.47	41.65
Aplysina fistularis	1	0	3.09	7.68	3.47	45.13
Millepora alcicornis	1	0	3.09	7.68	3.47	48.6
Ophiuroidea	0	1	3.09	7.68	3.47	52.07
Crustose coralline algae	1	0.11	2.64	2.09	2.97	55.04
Stephanocoeania intersepta/Siderastrea radians	0.9	0	2.61	2.07	2.93	57.97
Aplysina cauliformis	0.6	0	2.56	2.06	2.88	60.85
Agaricia fragilis	0.9	0	2.49	2.1	2.79	63.64
Diploria labyrinthiformis	0.9	0	2.49	2.1	2.79	66.43
Distichopathes filix	0	0.56	2.47	2.12	2.78	69.2
Parazonanthidae	0	0.44	2.15	1.34	2.41	71.61
Groups 15m & 300m
Average dissimilarity = 91.48
	Group 15	Group 300
Species	Av.Abund	Av.Abund	Av.Diss	Diss/SD	Contrib%	Cum.%
Madracis myriaster	0	0.67	3.19	6.1	3.48	3.48
Orbicella franksi	1	0	3.19	6.1	3.48	6.96
Montastraea cavernosa	1	0	3.19	6.1	3.48	10.45
Diploria labyrinthiformis	1	0	3.19	6.1	3.48	13.93
Pseudodiploria strigosa	1	0	3.19	6.1	3.48	17.41
Porites astreoides	1	0	3.19	6.1	3.48	20.89
Stichopathes spp.	0	1	3.19	6.1	3.48	24.38
Antillogorgia spp.	1	0	3.19	6.1	3.48	27.86
Eunicea spp.	1	0	3.19	6.1	3.48	31.34
Hypnogorgia sp.	0	0.67	3.19	6.1	3.48	34.82
Plexaurella spp.	1	0	3.19	6.1	3.48	38.31
Pseudoplexaura spp.	1	0	3.19	6.1	3.48	41.79
Dictyopteris spp. /Dictyota spp.	1	0	3.19	6.1	3.48	45.27
Brown fleshy crust	1	0	3.19	6.1	3.48	48.75
Aplysina fistularis	1	0	3.19	6.1	3.48	52.24
Ophiuroidea	0	1	3.19	6.1	3.48	55.72
Palythoa caribaeorum	0.9	0	2.56	2.04	2.79	58.51
Distichopathes filix	0	0.56	2.52	2.08	2.75	61.27
Parazonanthidae	0	0.44	2.26	1.33	2.47	63.73
Crustose coralline algae	0.9	0.11	2.16	1.33	2.36	66.1
Millepora alcicornis	0.8	0	1.97	1.33	2.16	68.25
Yellow encrusting sponge	0	0.78	1.96	1.34	2.15	70.4
Groups 90m & 300m
Average dissimilarity = 85.18
	Group 90	Group 300
Species	Av.Abund	Av.Abund	Av.Diss	Diss/SD	Contrib%	Cum.%
Dictyopteris spp. /Dictyota spp.	1	0	3.76	3.1	4.42	4.42
Ophiuroidea	0	1	3.76	3.1	4.42	8.83
Madracis myriaster	0.27	0.67	3.48	2.03	4.09	12.92
Crustose coralline algae	1	0.11	3.45	1.99	4.04	16.96
Cladophora sp.	0.82	0	3.27	1.87	3.84	20.8
Sporochnus bolleanus	0.91	0	3.22	1.87	3.78	24.58
Antipathes atlantica	1	0.22	3.1	1.48	3.63	28.21
Leptogorgia sp.	0.55	0	2.8	1.37	3.29	31.5
Yellow encrusting sponge	0	0.78	2.78	1.37	3.27	34.77
Coleopleurus floridanus	0	0.67	2.65	1.14	3.12	37.89
Galaxaura sp.	0.55	0	2.64	1.56	3.1	40.98
Stichopathes spp.	0.55	1	2.52	1.12	2.96	43.94
Hypnogorgia sp.	0	0.67	2.43	1.56	2.86	46.8
Hydroid sp. 1	0.73	0	2.43	1.56	2.86	49.65
Tanacetipathes tanacetum	0.73	0.11	2.28	1.01	2.67	52.33
Antipathes furcata	0.45	0	2.28	1.19	2.67	55
Green filamentous algae	0.55	0	2.28	1.19	2.67	57.67
Ellisella atlantica/elongata	0.73	0	2.09	1.19	2.46	60.13
Verdigellas peltata	0.55	0	2.02	1.17	2.37	62.5
Dasya spp.	0.45	0	1.94	1.19	2.28	64.78
Membranous red blades	0.64	0	1.94	1.19	2.28	67.06
Orange-red encrusting sponge	1	0.56	1.92	0.8	2.25	69.31
Distichopathes filix	0	0.56	1.9	1.21	2.23	71.54
Groups 150m & 300m
Average dissimilarity = 69.06
	Group 150	Group 300
Species	Av.Abund	Av.Abund	Av.Diss	Diss/SD	Contrib%	Cum.%
Ophiuroidea	0	1	4.56	6.61	6.6	6.6
Antipathes atlantica	0.9	0.22	4.42	3.99	6.4	12.99
Crustose coralline algae	1	0.11	4.42	3.99	6.4	19.39
Tanacetipathes tanacetum	1	0.11	4.41	3.96	6.38	25.77
Coleopleurus floridanus	0	0.67	3.54	1.61	5.13	30.9
Dark green encruster	0.8	0.11	3.42	1.61	4.95	35.85
Hypnogorgia sp.	0.1	0.67	3.35	1.77	4.85	40.71
Antipathes furcata	0.6	0	3.17	1.36	4.6	45.3
Creamy-white encrusting sponge	0.6	0.11	3.14	1.45	4.55	49.85
Orange-red encrusting sponge	1	0.56	2.86	1.16	4.14	53.99
Madracis myriaster	0.1	0.67	2.82	1.36	4.09	58.08
Yellow encrusting sponge	0.7	0.78	2.64	1.07	3.83	61.9
Placogorgia spp.	0.5	0.56	2.46	1.08	3.56	65.46
Distichopathes filix	0.3	0.56	2.41	1.08	3.49	68.95
Nicella sp.	0.4	0.33	2.33	1.08	3.38	72.33
Groups 200m & 300m
Average dissimilarity = 43.46
	Group 200	Group 300
Species	Av.Abund	Av.Abund	Av.Diss	Diss/SD	Contrib%	Cum.%
Crustose coralline algae	0.83	0.11	3.26	1.32	7.51	7.51
Coleopleurus floridanus	0	0.67	3.2	1.21	7.36	14.86
Parazonanthidae	0.89	0.44	2.69	1.06	6.19	21.06
Distichopathes filix	0.72	0.56	2.67	0.96	6.14	27.2
Orange-red encrusting sponge	0.94	0.56	2.18	0.77	5.02	32.22
Yellow encrusting sponge	0.78	0.78	2.01	0.75	4.62	36.84
Dark green encruster	0.39	0.11	1.86	0.9	4.27	41.12
Asteroidea sp. 2	0.33	0	1.83	0.75	4.22	45.33
Asteroidea sp. 4	0.33	0.11	1.56	0.74	3.59	48.92
Caryophyllidae	0.28	0.11	1.49	0.64	3.43	52.35
Antipathes atlantica	0.33	0.22	1.48	0.76	3.41	55.76
Asteroidea sp. 1	0	0.33	1.48	0.66	3.41	59.17
Copidaster schismochilus	0.22	0.11	1.46	0.65	3.36	62.53
Ophiuroidea	0.67	1	1.41	0.66	3.25	65.78
Hypnogorgia sp.	0.94	0.67	1.33	0.56	3.07	68.85
Yellow-green encrusting sponge	1	0.78	1.3	0.52	2.98	71.84
Groups 60m & 250m
Average dissimilarity = 82.88
	Group 60	Group 250
Species	Av.Abund	Av.Abund	Av.Diss	Diss/SD	Contrib%	Cum.%
Distichopathes filix	0	1	4.01	2.8	4.84	4.84
Hypnogorgia sp.	0	1	4.01	2.8	4.84	9.67
Stichopathes spp.	0.08	1	3.78	2.19	4.56	14.23
Madracis myriaster	0	0.91	3.68	1.99	4.44	18.67
Sporochnus bolleanus	0.75	0	3.3	1.55	3.98	22.65
Yellow encrusting sponge	0	0.82	3.11	1.8	3.75	26.4
Dasya spp.	0.75	0	2.83	1.8	3.41	29.81
Caulerpa chemnitzia	0.75	0	2.73	1.66	3.3	33.11
Parazonanthidae	0	0.64	2.54	1.09	3.07	36.18
Lobophora canariensis	0.75	0	2.5	1.58	3.02	39.2
Caulerpa mexicana	0.5	0	2.39	0.92	2.88	42.08
Caulerpa mexicana	0.5	0	2.39	0.92	2.88	44.96
Dictyopteris spp. /Dictyota spp.	0.67	0	2.33	1.37	2.81	47.76
Placogorgia spp.	0	0.64	2.32	1.23	2.79	50.56
Ophiuroidea	0	0.64	2.24	1.23	2.7	53.25
Creamy-white encrusting sponge	0	0.64	2.17	1.28	2.62	55.88
Green filamentous algae	0.58	0	2.16	1.12	2.6	58.48
Verdigellas peltata	0.58	0	2.07	1.2	2.5	60.97
Membranous red blades	0.5	0	1.99	1.05	2.41	63.38
Crustose coralline algae	0.92	0.45	1.97	0.95	2.38	65.76
Cladophora sp.	0.5	0	1.74	0.94	2.1	67.85
Red sieve encrusting sponge, cf. Phorbas amaranthus	0.5	0	1.65	0.95	1.99	69.84
Nicella sp.	0	0.45	1.51	0.9	1.82	71.67
Groups 30m & 250m
Average dissimilarity = 85.79
	Group 30	Group 250
Species	Av.Abund	Av.Abund	Av.Diss	Diss/SD	Contrib%	Cum.%
Madracis myriaster	0	0.91	2.98	8.21	3.48	3.48
Madracis spp.	1	0	2.98	8.21	3.48	6.95
Orbicella franksi	1	0	2.98	8.21	3.48	10.43
Montastraea cavernosa	1	0	2.98	8.21	3.48	13.91
Pseudodiploria strigosa	1	0	2.98	8.21	3.48	17.38
Porites astreoides	1	0	2.98	8.21	3.48	20.86
Stichopathes spp.	0	1	2.98	8.21	3.48	24.34
Distichopathes filix	0	1	2.98	8.21	3.48	27.82
Antillogorgia spp.	1	0	2.98	8.21	3.48	31.29
Hypnogorgia sp.	0	1	2.98	8.21	3.48	34.77
Dictyopteris spp. /Dictyota spp.	1	0	2.98	8.21	3.48	38.25
Lobophora canariensis	1	0	2.98	8.21	3.48	41.72
Brown fleshy crust	1	0	2.98	8.21	3.48	45.2
Aplysina fistularis	1	0	2.98	8.21	3.48	48.68
Millepora alcicornis	1	0	2.98	8.21	3.48	52.15
Stephanocoeania intersepta/Siderastrea radians	0.9	0	2.65	2.55	3.09	55.25
Agaricia fragilis	0.9	0	2.57	2.61	2.99	58.24
Diploria labyrinthiformis	0.9	0	2.57	2.61	2.99	61.23
Yellow encrusting sponge	0	0.82	2.55	2.64	2.98	64.21
Placogorgia spp.	0	0.64	2.18	1.77	2.54	66.75
Parazonanthidae	0	0.64	2.16	1.56	2.52	69.27
Meandrina meandrites	0.7	0	2.04	1.43	2.37	71.64
Groups 15m & 250m
Average dissimilarity = 89.98
	Group 15	Group 250
Species	Av.Abund	Av.Abund	Av.Diss	Diss/SD	Contrib%	Cum.%
Madracis myriaster	0	0.91	3.04	6.49	3.38	3.38
Orbicella franksi	1	0	3.04	6.49	3.38	6.76
Montastraea cavernosa	1	0	3.04	6.49	3.38	10.13
Diploria labyrinthiformis	1	0	3.04	6.49	3.38	13.51
Pseudodiploria strigosa	1	0	3.04	6.49	3.38	16.89
Porites astreoides	1	0	3.04	6.49	3.38	20.27
Stichopathes spp.	0	1	3.04	6.49	3.38	23.65
Distichopathes filix	0	1	3.04	6.49	3.38	27.02
Antillogorgia spp.	1	0	3.04	6.49	3.38	30.4
Eunicea spp.	1	0	3.04	6.49	3.38	33.78
Hypnogorgia sp.	0	1	3.04	6.49	3.38	37.16
Plexaurella spp.	1	0	3.04	6.49	3.38	40.53
Pseudoplexaura spp.	1	0	3.04	6.49	3.38	43.91
Dictyopteris spp. /Dictyota spp.	1	0	3.04	6.49	3.38	47.29
Brown fleshy crust	1	0	3.04	6.49	3.38	50.67
Aplysina fistularis	1	0	3.04	6.49	3.38	54.05
Palythoa caribaeorum	0.9	0	2.61	2.53	2.9	56.95
Yellow encrusting sponge	0	0.82	2.58	2.59	2.86	59.81
Millepora alcicornis	0.8	0	2.21	1.74	2.45	62.27
Parazonanthidae	0	0.64	2.19	1.54	2.44	64.7
Placogorgia spp.	0	0.64	2.18	1.76	2.42	67.13
Orange-red encrusting sponge	0.3	1	2.1	1.43	2.33	69.46
Agaricia fragilis	0.7	0	1.89	1.32	2.1	71.56
Groups 90m & 250m
Average dissimilarity = 76.86
	Group 90	Group 250
Species	Av.Abund	Av.Abund	Av.Diss	Diss/SD	Contrib%	Cum.%
Distichopathes filix	0	1	3.33	5.06	4.33	4.33
Hypnogorgia sp.	0	1	3.33	5.06	4.33	8.66
Dictyopteris spp. /Dictyota spp.	1	0	3.33	5.06	4.33	12.98
Sporochnus bolleanus	0.91	0	3	2.48	3.9	16.88
Ellisella atlantica/elongata	0.73	0.18	2.82	1.99	3.67	20.55
Cladophora sp.	0.82	0	2.74	1.97	3.56	24.11
Yellow encrusting sponge	0	0.82	2.65	2.01	3.45	27.56
Madracis myriaster	0.27	0.91	2.62	1.68	3.41	30.97
Hydroid sp. 1	0.73	0	2.34	1.52	3.04	34.01
Tanacetipathes tanacetum	0.73	0	2.32	1.4	3.02	37.03
Antipathes atlantica	1	0.27	2.3	1.39	3	40.03
Parazonanthidae	0.09	0.64	2.11	1.31	2.75	42.78
Placogorgia spp.	0	0.64	2.01	1.34	2.61	45.39
Galaxaura sp.	0.55	0	1.99	1.15	2.58	47.97
Membranous red blades	0.64	0	1.95	1.23	2.54	50.51
Leptogorgia sp.	0.55	0	1.93	1.13	2.51	53.02
Creamy-white encrusting sponge	0	0.64	1.9	1.24	2.47	55.49
Green filamentous algae	0.55	0	1.9	1.08	2.47	57.96
Ophiuroidea	0	0.64	1.89	1.14	2.46	60.43
Crustose coralline algae	1	0.45	1.85	1.07	2.41	62.84
Verdigellas peltata	0.55	0	1.71	1.08	2.22	65.06
Stichopathes spp.	0.55	1	1.71	0.95	2.22	67.28
Antipathes furcata	0.45	0	1.7	0.95	2.21	69.49
Dasya spp.	0.45	0	1.54	0.94	2	71.49
Groups 150m & 250m
Average dissimilarity = 52.13
	Group 150	Group 250
Species	Av.Abund	Av.Abund	Av.Diss	Diss/SD	Contrib%	Cum.%
Tanacetipathes tanacetum	1	0	4.06	7.87	7.78	7.78
Hypnogorgia sp.	0.1	1	3.69	2.71	7.08	14.86
Creamy-white encrusting sponge	0.6	0.64	3.52	2.32	6.75	21.62
Madracis myriaster	0.1	0.91	3.34	2.05	6.4	28.02
Dark green encruster	0.8	0.18	3.04	1.55	5.83	33.85
Distichopathes filix	0.3	1	3	1.55	5.75	39.6
Antipathes furcata	0.6	0	2.49	1.24	4.79	44.38
Nicella sp.	0.4	0.45	2.3	1.15	4.42	48.8
Crustose coralline algae	1	0.45	2.28	1.07	4.38	53.18
Ophiuroidea	0	0.64	2.24	1.16	4.29	57.47
Antipathes atlantica	0.9	0.27	2.16	0.99	4.14	61.61
Placogorgia spp.	0.5	0.64	2.07	1	3.97	65.58
Viminella sp.	0.5	0	2.05	1	3.94	69.52
Parazonanthidae	0.7	0.64	1.65	0.82	3.17	72.69
Groups 200m & 250m
Average dissimilarity = 28.28
	Group 200	Group 250
Species	Av.Abund	Av.Abund	Av.Diss	Diss/SD	Contrib%	Cum.%
Crustose coralline algae	0.83	0.45	1.86	0.94	6.58	6.58
Asteroidea sp. 4	0.33	0.27	1.72	0.86	6.09	12.67
Parazonanthidae	0.89	0.64	1.66	0.82	5.88	18.55
Dark green encruster	0.39	0.18	1.62	0.84	5.74	24.3
Madrepora oculata	0.06	0.27	1.45	0.75	5.12	29.42
Ophiuroidea	0.67	0.64	1.39	0.74	4.92	34.34
Antipathes atlantica	0.33	0.27	1.28	0.67	4.54	38.89
Distichopathes filix	0.72	1	1.26	0.59	4.46	43.35
Purple encruster	0.22	0.27	1.23	0.76	4.35	47.7
Yellow encrusting sponge	0.78	0.82	1.16	0.59	4.09	51.8
Asteroidea sp. 2	0.33	0.27	1.1	0.65	3.88	55.67
Caryophyllidae	0.28	0	1.02	0.58	3.62	59.29
Coleopleurus floridanus	0	0.27	1	0.57	3.54	62.83
Placogorgia spp.	0.67	0.64	0.99	0.53	3.49	66.33
Copidaster schismochilus	0.22	0.18	0.95	0.59	3.36	69.69
Creamy-white encrusting sponge	0.56	0.64	0.93	0.54	3.3	72.99
Groups 300m & 250m
Average dissimilarity = 37.38
	Group 300	Group 250
Species	Av.Abund	Av.Abund	Av.Diss	Diss/SD	Contrib%	Cum.%
Orange-red encrusting sponge	0.56	1	2.42	0.86	6.47	6.47
Distichopathes filix	0.56	1	2.41	0.86	6.44	12.91
Crustose coralline algae	0.11	0.45	2.22	0.91	5.95	18.85
Creamy-white encrusting sponge	0.11	0.64	1.85	0.85	4.96	23.81
Parazonanthidae	0.44	0.64	1.84	0.85	4.92	28.73
Antipathes atlantica	0.22	0.27	1.83	0.85	4.89	33.62
Hypnogorgia sp.	0.67	1	1.74	0.69	4.66	38.28
Coleopleurus floridanus	0.67	0.27	1.59	0.66	4.24	42.52
Asteroidea sp. 1	0.33	0	1.53	0.67	4.08	46.61
Yellow encrusting sponge	0.78	0.82	1.49	0.63	3.99	50.59
Placogorgia spp.	0.56	0.64	1.46	0.63	3.91	54.51
Asteroidea sp. 2	0	0.27	1.32	0.68	3.53	58.03
Purple encruster	0	0.27	1.28	0.68	3.43	61.46
Ophiuroidea	1	0.64	1.22	0.52	3.26	64.72
Ellisella atlantica/elongata	0	0.18	1.21	0.52	3.24	67.97
Yellow-green encrusting sponge	0.78	1	1.19	0.52	3.19	71.15
